# Supplementary material for: MWCNT-Au/Pt-modified screen-printed electrode for electrochemical detection of secondary metabolites in Ganoderma-infected oil palms
Source: Royal Society of Chemistry journal article supplement (doi:10.1039/d5ra09886f), 2026-03-19
Supplement: d5ra09886f1.xlsx [file d5ra09886f1.xlsx]

## Sheet: Healthy-Phytol-H
V	µA	µA	µA	µA	µA	µA
	SPE mod 1	SPE mod 2	SPE mod 3	SPE mod 4	SPE mod 5	SPE mod 6			Unspiked 1	Unspiked 2	Unspiked 3	Unspiked 4	Unspiked 5	Unspiked 6
-0.79995	-11.3709	-9.68898	1.9193	2.12179	-7.62018	-4.92667			-115.101	-299.649	-432.75	-269.524	-288.853	-160.133
-0.78986	-0.567194	-0.483302	1.60306	1.7707	-3.64952	3.31412			-17.7079	-88.4557	-15.0391	-21.6118	-46.1365	-13.9327
-0.77977	0.0579024	0.0509124	0.84538	0.939937	-1.18264	5.37403			-0.882008	-42.3635	-4.40331	-6.31787	-18.8316	-2.6508
-0.76968	0.441684	0.378436	0.495778	0.550959	-0.321126	8.21329			-0.327216	-16.7307	-7.91974	-2.76272	-10.7471	-6.2144
-0.75959	0.590814	0.504787	0.544391	0.594663	1.00514	17.6166			2.14482	-6.22703	-7.85219	-0.91371	-11.6076	-12.2899
-0.7495	0.272073	0.232314	0.581461	0.647816	1.76792	14.1283			0.587547	0.424101	-7.4244	-0.336415	-1.99497	-11.0182
-0.73941	1.65234	1.41096	0.098805	0.112337	2.85783	18.7679			4.3667	2.34119	-8.45644	0.334365	-1.73183	-17.3782
-0.72932	7.21712	6.14824	-0.00287496	-0.00316798	4.70422	14.5857			4.19733	-16.8041	-7.4915	0.647979	-3.1344	-9.75063
-0.71923	7.34708	6.26095	0.0567369	0.0690296	3.98359	16.4235			2.13919	-6.26074	-5.84768	1.04667	-11.9481	-5.0274
-0.70913	7.00404	5.9717	-0.00638154	-0.00701996	1.85181	17.5474			6.67418	0.856482	-3.15204	2.27778	-2.67162	1.45408
-0.69904	6.57634	5.606	-0.00394218	-0.00433798	7.20836	17.9672			0.43179	2.85573	0.211046	0.168112	-2.45824	-4.2528
-0.68895	6.60458	5.62813	-0.00554301	-0.00610197	6.98634	21.7393			0.568205	3.24236	0.819275	-0.531382	-3.54657	-8.20734
-0.67886	6.85325	5.83824	0.129243	0.137537	9.72627	21.3496			7.45148	-0.954602	2.32571	0.994298	-2.93812	-8.84285
-0.66877	6.77697	5.77348	-0.000225249	-0.00700196	7.09788	21.4379			11.4522	0.501711	1.80269	-0.0818025	-1.42712	-8.02928
-0.65868	6.99627	5.96414	0.945938	-0.00372598	4.69131	21.6218			11.9976	0.670061	3.34754	-1.46737	0.198616	-4.86682
-0.64859	6.73542	5.74056	1.02294	1.55751	4.1514	14.3921			14.9266	0.0266262	3.23651	-1.80935	1.0557	-3.09268
-0.6385	6.538	5.57035	2.10395	1.68355	2.01115	12.6836			17.969	0.202006	4.51655	-3.11953	2.31389	-2.589
-0.6284	6.16255	5.25161	1.72964	3.3732	2.07985	10.1237			18.475	0.353162	4.40729	-3.18437	2.02811	3.05291
-0.61831	6.00383	5.11808	2.60829	3.22729	0.821608	10.3997			20.7758	2.47412	6.09084	-5.14973	3.00326	2.4382
-0.60822	5.43552	4.63235	2.07066	11.035	-0.0313827	9.84897			21.2832	1.70738	3.20101	-0.155962	3.14563	7.10728
-0.59813	5.15439	4.39604	2.20786	15.2945	1.24747	12.7286			21.6824	2.49304	4.60575	-1.58005	4.10469	9.59431
-0.58804	4.7735	4.07022	1.60184	10.3163	0.254088	16.531			21.4034	3.1366	3.99461	-2.11159	2.8555	2.91768
-0.57795	4.52103	3.85483	0.460963	16.3677	0.657368	16.0649			19.1137	5.16138	6.454	-3.69186	4.09772	2.03557
-0.56786	4.39926	3.75031	0.266315	22.0858	0.882698	12.3007			19.7184	9.06552	7.25777	-3.75182	3.7756	6.80367
-0.55777	3.16689	2.69905	0	15.4731	1.7302	7.17646			19.2447	10.1822	8.46397	-5.08108	3.14766	8.70467
-0.54768	3.22991	2.75342	-0.0316137	12.1814	2.35297	6.65256			19.6032	10.9725	8.12018	-5.6419	2.71113	6.25093
-0.53758	2.72901	2.32553	-0.0480031	15.2969	3.0835	6.26897			15.3428	11.598	10.7967	-4.31543	2.90606	2.3479
-0.52749	1.74289	1.48854	-0.0710573	14.2926	5.18052	7.94011			12.9029	12.0233	10.2673	-0.516608	3.30067	-2.10161
-0.5174	1.4386	1.22814	-0.101157	15.7546	6.87559	5.27166			10.6115	11.6122	10.3493	0.687795	2.06249	-7.93136
-0.50731	1.19964	1.02316	-0.0567042	15.4966	5.74985	4.79552			10.1833	12.8262	10.6554	0.49557	1.08067	-7.44627
-0.49722	0.633673	0.541812	-0.103695	9.92221	6.20012	6.69312			8.63105	13.6117	10.8001	0.217335	1.03674	-9.2144
-0.48713	0.369473	0.316374	-0.0982387	14.6411	6.64931	7.64621			9.36906	13.9275	10.5167	-1.30036	0.393015	-13.2647
-0.47704	0.405718	0.34415	-0.103205	11.1562	5.32573	8.41883			11.1015	14.5704	9.73358	-0.76593	-1.23641	-15.4314
-0.46695	0.433827	0.372929	-0.0575428	6.57259	-0.0556953	9.17596			9.93796	13.836	9.94879	-0.605033	-1.74299	-15.3759
-0.45686	0.0719979	0.062491	-0.085737	3.46185	-0.0389722	11.6246			11.0405	12.6982	9.51323	1.11685	-1.72301	-15.3276
-0.44676	-0.0215601	-0.0183711	-0.126455	0.256949	-0.109784	11.1284			12.6909	12.193	9.29485	1.6491	-1.05949	-12.4417
-0.43667	0.0409863	0.037829	-0.0982823	-0.309292	0.286835	9.03035			12.0326	10.2513	8.05216	2.99023	-0.121861	-10.9685
-0.42658	-0.0478868	-0.0408073	-0.125867	3.25823	1.71305	4.77724			13.6182	12.3993	6.56037	6.17996	1.78781	-11.2874
-0.41649	-0.0295562	-0.0251845	-0.0444965	9.72979	2.77693	5.71344			15.3878	14.3171	5.83011	7.88176	4.21346	-10.3315
-0.4064	-0.0416322	-0.0354778	0	15.6915	3.72627	8.3778			16.9618	13.4616	3.87229	9.77328	5.57273	-8.25739
-0.39631	0.0935253	0.0787721	0.695403	18.0465	5.14148	9.12035			19.4612	12.9213	3.71429	12.0977	8.30705	-4.25015
-0.38622	1.38709	1.18034	2.43035	11.0232	6.0146	11.4254			21.5513	13.2849	3.61108	15.9855	12.9406	-3.92219
-0.37612	2.91437	2.48292	2.50577	10.693	8.99557	12.2367			23.4099	17.8445	3.07297	19.2706	16.3192	-1.87568
-0.36603	5.37006	4.57759	5.22682	7.02487	10.6088	8.85526			26.1601	14.3182	2.11738	22.6516	21.5787	0.00951666
-0.35594	8.73924	7.44805	7.88831	10.1486	13.2446	7.47239			30.7316	11.0233	1.51076	26.5919	25.9007	2.50835
-0.34585	12.6259	10.7618	10.672	12.076	15.5158	0			33.3381	8.21005	2.52638	30.8662	30.0792	3.40802
-0.33576	16.2434	13.8444	13.5465	9.46977	17.5479	4.78928			37.7474	4.86642	2.15776	35.4631	34.7189	4.39727
-0.32567	19.3498	16.4905	17.3203	7.0502	18.825	1.60824			43.188	3.8889	4.44413	39.2152	41.0353	8.30649
-0.31558	22.1661	18.8912	20.5202	4.69817	21.1361	3.21047			46.2558	16.3018	6.37876	45.2006	46.5197	11.3417
-0.30549	24.8371	21.164	20.8494	2.82625	23.9556	4.75207			47.6914	29.772	14.7461	48.7883	51.5701	18.0448
-0.2954	27.2789	23.2458	19.3137	-1.41854	24.7418	7.79724			47.6746	37.1743	25.2209	53.5596	55.7748	22.3601
-0.2853	29.627	25.2445	20.6424	3.84242	28.1052	15.6404			52.2299	40.9829	40.7688	58.4774	59.7753	24.794
-0.27521	32.188	27.4304	25.424	1.19912	29.4752	31.9009			54.934	49.928	55.0585	62.3705	61.0189	31.6359
-0.26512	35.4925	30.2455	29.5106	5.02195	32.5201	35.9667			63.3199	56.0501	65.0258	65.4272	62.9655	36.8927
-0.25503	40.0723	34.1454	34.3112	10.2777	33.3966	42.4981			62.2803	69.3328	73.3818	70.7494	68.3793	42.9336
-0.24494	44.211	37.6723	36.9221	12.5476	35.4872	37.8119			68.9791	71.5978	76.0543	72.6547	74.8107	53.5555
-0.23485	45.6069	39.5572	36.4858	21.1449	25.5205	31.5389			77.1746	76.5802	76.9991	75.6032	79.036	70.1066
-0.22476	45.2326	38.5444	34.2181	36.9189	23.9343	29.9459			83.6475	79.6614	75.4087	77.3628	81.7902	76.5547
-0.21467	40.392	34.4192	30.2991	30.5203	21.1932	27.1714			77.2584	79.3503	74.0362	77.1665	79.9798	63.7137
-0.20458	34.2918	29.222	27.5953	20.1886	19.3019	23.0998			68.1809	77.2861	71.1599	76.8434	74.8914	56.2527
-0.19448	28.6318	24.3974	24.2233	8.38423	16.9433	27.4751			57.164	72.6043	70.7477	76.6493	67.8977	51.7505
-0.18439	23.4749	20.0053	22.021	4.64349	15.4029	33.7495			45.1227	70.6689	69.4853	74.4557	62.9443	49.1542
-0.1743	19.0442	16.229	20.5401	3.58977	14.3671	32.0823			38.0532	70.2456	71.8493	71.9358	55.8613	45.0746
-0.16421	15.5626	13.2617	19.7624	3.17716	5.5055	27.3006			30.6125	69.4239	72.5105	68.9959	48.124	40.3215
-0.15412	12.7867	10.8971	18.0093	2.83205	7.9967	24.2223			27.154	62.5615	74.1903	66.6298	41.2432	34.8101
-0.14403	10.6252	9.05443	16.7049	6.27601	9.32481	24.9498			23.3113	54.2176	71.31	61.5366	35.6747	29.617
-0.13394	9.3054	7.932	15.1987	5.30147	8.67429	23.936			19.0178	46.8299	64.0766	57.2995	30.3395	28.0339
-0.12385	7.65238	6.52319	13.8864	4.52233	9.11827	23.2809			15.7802	38.3204	54.4522	52.6006	25.999	23.3856
-0.11376	6.89526	5.87761	12.3223	4.37412	10.8745	27.4128			15.9389	32.5523	43.7288	47.6351	21.5998	21.2776
-0.10366	5.48151	4.67178	10.538	0.705488	7.69209	28.6351			11.1723	27.8601	34.6057	43.9594	17.0254	18.1974
-0.09357	4.43399	3.77966	9.78935	1.65621	8.82566	31.3782			8.44667	22.2016	27.8546	39.5045	13.3433	15.3021
-0.08348	2.99782	2.55565	7.84174	2.91962	11.9971	31.3924			6.80216	18.4428	20.2677	35.1497	9.28112	10.5937
-0.07339	2.35512	2.00951	6.57463	2.91422	13.2925	31.3911			4.33567	17.5969	16.4695	31.0961	6.35659	8.14375
-0.0633	1.36856	1.16702	4.98655	5.79728	16.301	31.1744			5.00075	15.2271	12.4001	27.4755	3.17661	6.77596
-0.05321	0.515897	0.441398	3.31764	8.22352	15.2883	32.0952			1.79976	11.9492	9.02473	22.2474	2.03287	5.16218
-0.04312	-0.00993384	-0.0084645	2.20648	18.9129	13.8718	17.3773			0.963001	9.37037	6.79312	18.4116	-0.22845	4.11616
-0.03303	-0.0146596	-0.0124878	1.47946	20.7197	12.4664	15.3708			-0.152892	6.86741	6.41965	14.551	-1.17748	1.40867
-0.02293	-0.0381083	-0.0324682	-0.0074052	19.3262	14.5854	18.7449			0.343872	4.81221	2.32511	11.5274	-1.67602	-0.292948
-0.01284	-0.0628571	-0.0535562	-0.0565844	12.5179	12.9127	15.1678			-0.382288	2.54426	2.00536	8.35536	-1.26188	-1.60809
-0.00275	-0.0712538	-0.0607145	-0.182821	15.3241	11.587	18.5159			0.006209	1.31077	-0.105231	5.25174	-1.09263	0.386824
0.00734	-0.0303575	-0.0258638	-0.259138	18.5226	9.49104	18.767			-1.00248	0	-0.247059	2.19855	0.11644	-1.19536
0.01743	0	0	-0.344984	17.5701	8.11722	18.6168			-0.748718	-1.79339	-1.67398	0.857414	-0.430683	-0.573003
0.02752	0.133032	0.116852	-0.478692	16.3051	6.46271	18.4596			-2.04053	-2.74699	-2.62347	0.08424	1.01014	1.17377
0.03761	0.618711	0.529533	-0.450748	14.7418	6.47931	14.437			-1.54432	-4.72485	-2.08555	-1.43287	0.251877	0.230143
0.0477	0.650998	0.554843	-0.58892	16.4642	4.80424	10.7943			1.6525	-3.98746	-1.05899	-1.43528	0.878238	0.274154
0.05779	0.985625	0.839919	-0.601139	14.9705	4.61769	11.9596			1.48603	-4.92371	-1.54953	-2.70785	1.07279	1.51086
0.06789	1.0451	0.889546	-0.75312	15.0171	3.31589	8.49616			3.81831	-6.50181	-1.54023	-3.7118	1.42994	2.73947
0.07798	0.881381	0.75495	-0.753022	11.9497	3.80335	7.73018			3.7654	-6.2247	-1.02544	-2.82254	1.48396	4.63871
0.08807	0.62974	0.535218	-0.887012	12.5967	2.80828	2.71325			5.68091	-5.14611	-1.00925	-2.34359	2.05349	4.76139
0.09816	0.356163	0.304429	-0.883713	13.3765	7.65265	4.44165			9.01711	-2.43883	0.785009	-1.79696	2.30824	4.95234
0.10825	0.15774	0.13376	-0.926075	9.00859	6.85536	3.85417			8.51197	-2.49179	2.59536	-1.01475	2.52836	5.46431
0.11834	-0.0188212	-0.0160408	-0.949619	13.3105	6.14762	5.14742			7.5738	-0.726748	2.67319	0.0306	3.27359	6.85684
0.12843	-0.0118388	-0.0100843	-0.909925	12.2858	5.33476	5.13465			8.86481	0.761926	3.53619	0.558	3.62315	6.51725
0.13852	-0.0319028	-0.0271805	-0.866408	10.221	4.91446	5.09694			11.0813	4.47141	4.43226	1.99525	4.16633	7.98947
0.14862	0.234659	0.203127	-0.815857	9.31835	4.53411	5.02632			12.5365	11.429	4.61683	2.70324	4.93215	8.37775
0.15871	0	0	-0.776305	8.4016	3.8367	4.60644			13.418	13.9171	4.34735	3.83432	4.74356	8.54201
0.1688	0.549566	0.468285	-0.724664	11.5575	3.12608	4.33803			13.5267	15.4734	5.13726	4.81232	4.78859	8.75956
0.17889	0.561413	0.478767	-0.683456	11.2732	2.46933	4.40324			12.8556	28.4158	10.254	5.4648	5.14011	8.19112
0.18898	0.891233	0.762568	-0.532793	10.4678	1.9438	3.90465			17.8102	29.1927	11.4173	6.96329	5.86597	9.43445
0.19907	0.927142	0.791786	-0.380279	12.8847	0.891741	3.54622			18.9507	29.0878	12.3971	6.58554	5.62752	9.32696
0.20916	1.2058	1.02806	-0.250862	14.7645	1.01672	3.13277			19.1014	27.907	13.4649	5.9142	5.27881	9.27371
0.21925	1.8158	1.54663	-0.045346	15.4406	1.13098	2.79935			19.0042	24.8297	14.1341	7.24711	5.81315	10.1692
0.22934	1.89704	1.6169	0.874304	12.683	0.504997	3.85488			19.9746	22.1785	14.417	7.87745	5.49641	9.53138
0.23944	2.23232	1.90266	2.66761	7.69651	0.184765	5.14401			21.8126	19.7528	16.3439	7.57543	5.39422	8.58826
0.24953	2.51371	2.1459	4.47232	-0.00401398	1.59632	5.13312			19.2343	16.9458	15.1536	6.96473	5.09744	7.21372
0.25962	1.89259	1.61204	6.03672	-0.0962455	4.68901	5.09291			21.4701	13.9836	16.3871	6.68798	5.11058	8.33226
0.26971	2.37932	2.02692	7.11762	1.00726	5.56719	5.03059			18.8911	13.3891	15.7993	7.05821	5.24334	7.26174
0.2798	2.43283	2.07126	9.11654	5.69191	5.18829	4.60298			15.642	10.1679	14.9036	6.31614	4.68591	7.00868
0.28989	2.59178	2.21244	11.3693	6.43741	4.54566	4.33781			17.3724	9.76972	13.9759	5.2468	4.99162	6.29543
0.29998	3.251	2.77084	11.3532	-0.0852655	4.19986	4.40404			13.3377	7.19748	12.2714	6.15719	3.56887	6.07275
0.31007	3.63606	3.09859	12.1263	-0.473433	3.82715	3.90524			13.1578	6.43577	10.8166	5.65799	3.20347	5.56991
0.32016	4.36697	3.72164	12.6158	-0.180215	3.42831	3.54614			9.29551	5.62388	7.86194	4.93781	3.10303	5.19311
0.33026	5.06413	4.31451	12.3716	-0.77513	3.86586	3.13596			8.54198	5.20252	7.95056	5.68542	1.27078	4.69962
0.34035	6.18568	5.27161	12.4375	-0.415276	3.42601	2.79665			5.62366	5.61253	5.82735	4.92033	0.472097	4.3609
0.35044	6.88919	5.86889	10.3708	-0.431674	2.79094	2.34762			6.2014	5.41603	4.26409	2.89884	-0.351234	4.0344
0.36053	7.94523	6.77012	10.1215	-0.448774	2.65545	2.18299			4.6201	4.43421	2.02516	2.38839	-2.38026	3.4487
0.37062	8.12179	6.92009	8.83494	-0.193427	2.00556	1.52298			8.62175	4.14253	1.39154	1.15065	-3.73586	2.59686
0.38071	8.34706	7.11409	8.39403	-0.501693	1.40283	1.15375			6.69939	5.82309	-1.38399	0.46794	-5.02188	2.37645
0.3908	8.08226	6.88773	7.17383	-0.537567	3.12768	1.15724			8.10447	6.36354	-3.76321	-1.22704	-6.01492	2.5198
0.40089	7.87389	6.70906	6.86719	-0.659174	2.47088	0.696116			6.61283	6.83971	-5.47593	-1.88429	-6.89468	2.03528
0.41099	7.02291	5.98629	5.21935	-0.610341	1.94535	0.521436			7.70783	6.23207	-7.75939	-2.97254	-8.00403	0.917632
0.42108	5.76459	4.91321	3.92552	-0.630158	0.893514	0.314477			10.4711	6.4434	-8.57434	-4.681	-9.58866	1.12148
0.43117	4.95394	4.22506	3.00721	-0.701294	1.01698	-0.00108921			5.49222	6.04041	-8.16004	-6.12952	-10.5471	2.37658
0.44126	3.74307	3.18934	2.29156	-0.567933	1.13262	-0.00155798			5.80803	6.51834	-10.8058	-6.42091	-11.9086	0.45128
0.45135	2.52163	2.14765	0.159386	-0.605265	0.506036	-0.00280692			11.2485	8.31068	-10.8201	-6.50632	-11.6345	0.617638
0.46144	1.74975	1.4936	-0.00669735	-0.574197	0.185478	11.966			10.8982	8.09554	-11.3422	-6.86197	-12.6065	0.742474
0.47153	1.35969	1.15712	-0.0824373	-0.799034	0.227843	8.50253			10.6237	5.65924	-9.78642	-6.99106	-13.2177	1.28028
0.48162	0.807715	0.690567	-0.0428848	-1.07501	0.75475	7.73727			9.12785	4.84655	-9.40342	-6.63717	-13.456	0.458808
0.49172	0.639003	0.543808	-0.00959409	-1.31657	0.418452	4.44573			9.07295	3.51468	-7.40643	-4.87409	-13.5842	0.4592
0.50181	0	0	0	-0.941098	0	0			8.02581	4.22019	-5.53378	-3.89768	-12.7715	0.363084
Max Current	45.6069	39.5572	36.9221	36.9189	35.4872	42.4981		Max Current	83.6475	79.6614	76.9991	77.3628	81.7902	76.5547	Average
Found	29.3148	32.6864	34.155	34.1568	34.9547	31.0474		Unspiked	8.114	10.3355	11.8193	11.6166	9.14907	12.0669	10.5169
Average	32.7192
RSD	0.0662757							Spiked Concentration		20
								Recovery	1.06004	1.11755	1.11679	1.12701	1.29028	0.949023	1.11011

## Sheet: Healthy-Phytol-L
V	µA	µA	µA	µA
	SPE mod 1	SPE mod 2	SPE mod 3	SPE mod 4	SPE mod 5	SPE mod 6			Unspiked 1	Unspiked 2	Unspiked 3	Unspiked 4	Unspiked 5	Unspiked 6
-0.79995	5.09816	10.4606	7.37705	7.45631	-231.493	-144.3			-13.5056	-69.132	-12.6377	-57.1225	-149.714	-151.911
-0.78986	5.03448	5.37995	5.69262	4.62019	-10.5977	-7.24867			-5.22647	-23.4859	-0.844017	-31.9934	-91.6286	-100.266
-0.77977	3.05974	8.05293	2.68715	4.46891	-0.758999	-1.41166			-1.31506	-7.59511	0.0153591	-11.8412	-43.6721	-56.7486
-0.76968	1.97563	8.03373	3.4407	1.80479	-0.00405965	-1.52058			-0.855792	-1.79985	-0.0426505	3.45583	-7.22401	-21.4787
-0.75959	0.347131	3.67174	3.0292	3.07067	-0.101093	-1.63593			0.572328	0.140297	0.279451	12.8363	16.8834	4.68814
-0.7495	1.63926	5.75221	1.72545	3.12351	-0.203645	-2.06062			1.90423	0.740488	0.248243	1.74374	5.32689	22.5835
-0.73941	1.7373	1.86446	0.372223	3.9977	-0.189351	-1.41166			1.94457	0.448541	0.368029	0.248658	4.26307	-7.16102
-0.72932	0	1.97077	2.46945	2.86191	0.207847	-1.52058			2.43234	0.0113279	-0.341682	-0.354846	2.35459	-7.16899
-0.71923	0.174707	0.318927	1.83973	4.35374	-0.481468	-1.63593			1.97182	0.436556	-0.313467	-0.526338	1.48249	-5.64759
-0.70913	2.05232	2.54247	1.866	3.6619	-0.252952	-2.06062			2.84715	0.171721	0.00524443	-0.950913	0.050881	-2.77089
-0.69904	1.13043	0.837348	2.7441	1.22498	0	-1.91085			1.02956	-0.0681576	0.762192	-1.0824	-0.251081	-0.182136
-0.68895	2.6743	3.60415	2.4748	0.74275	0.55269	-1.63847			1.96165	-0.613024	-0.74231	-1.03253	-0.188175	2.57339
-0.67886	1.05738	2.58625	4.52214	0.36592	-0.603984	-1.25011			3.78298	-1.33837	-1.39418	-0.928574	-0.00789973	4.99709
-0.66877	2.09054	1.79221	4.46644	1.96662	-1.13022	-1.0518			4.98984	-2.07637	-0.881331	-1.32916	-0.011237	6.80122
-0.65868	3.1358	2.81807	2.79325	3.16236	-0.713153	-1.19443			4.77346	-2.53514	-2.21951	-1.38416	0.332299	7.39196
-0.64859	1.76415	3.28252	2.04643	0.61654	-1.78791	-0.79731			5.79244	-1.52871	-1.96274	-1.09343	0.913512	5.7695
-0.6385	4.09286	3.51028	3.56884	3.17287	-1.58237	-0.755924			5.83139	-0.484595	-0.0682709	-0.853722	1.43291	3.98206
-0.6284	1.62217	4.41555	4.39597	4.23061	-0.252952	-0.0375765			6.53118	-1.13894	0.201722	-0.762719	1.97863	3.46714
-0.61831	1.21713	1.9191	1.69884	3.68231	0	-0.136558			6.48768	-1.00941	1.35613	-0.740323	2.7602	3.39762
-0.60822	2.0521	4.58418	3.33177	1.79	0.55269	0.280832			7.03792	-0.373296	0.054615	-0.841889	3.40464	3.32384
-0.59813	1.94576	1.46607	1.85798	4.83394	-0.603984	0.315959			7.14681	-0.61466	-0.632212	-0.285969	4.25051	3.89734
-0.58804	0.551499	0.907579	4.03511	2.73091	-1.13022	0.107997			7.92371	-1.20304	-0.146159	0.122488	4.37237	3.97454
-0.57795	2.13161	3.69679	1.40769	1.08343	-0.713153	-0.048724			7.14171	0.0114912	-1.18084	0.429889	4.92773	4.51565
-0.56786	0.485339	2.78488	0.452246	2.4522	-1.78791	-0.303673			7.43911	0.237972	-0.622072	1.14271	5.16842	5.42796
-0.55777	0.504747	2.37249	0.0802534	2.07108	-1.58237	-0.925418			7.14026	2.54496	-1.03986	2.38778	4.72339	5.1958
-0.54768	1.20869	5.23744	0.858532	3.88557	-2.09631	-0.695617			7.0867	2.62823	-1.2268	3.12302	3.97466	5.38566
-0.53758	2.42304	5.88335	3.20794	3.25561	-2.1493	-1.07197			6.45921	2.86931	-1.15121	4.47838	3.00342	5.4711
-0.52749	2.11672	3.34895	0.923263	3.814	-2.72988	-0.833021			6.68573	3.14497	-1.37003	5.83968	1.60017	4.88614
-0.5174	1.45078	2.35875	1.06584	5.58456	-2.80118	-1.73436			6.72409	2.08245	-1.40646	7.27272	0.58452	4.50145
-0.50731	3.76523	3.57956	1.90192	6.05066	-3.06156	-1.36768			6.20841	1.85072	-1.28921	9.12977	-0.454027	4.16707
-0.49722	3.86608	6.42476	1.58153	6.20371	-3.05459	-1.18761			6.02174	2.08848	-0.810049	11.0639	-1.72531	3.36714
-0.48713	6.37288	7.03938	4.09127	6.69856	-2.7546	-0.867809			6.19567	0.958709	0.0501072	12.8263	-2.32725	2.31875
-0.47704	6.02229	6.37059	1.73614	7.23563	-2.13736	-0.378261			6.63895	0.853675	1.14698	15.1055	-2.63598	1.41622
-0.46695	7.36934	9.22049	0.751145	9.2533	-1.32397	0.162142			6.78735	0.941228	3.03361	17.5894	-2.89138	1.54427
-0.45686	9.0543	12.0196	0.88373	10.0763	0	1.52809			7.02795	0.558743	6.0241	20.0284	-3.74851	0.865464
-0.44676	10.241	9.80881	3.15491	12.1026	2.28493	2.11251			6.93504	-0.17194	7.5742	22.321	-3.77392	-0.36016
-0.43667	14.3537	13.3165	2.37517	16.0244	3.3556	3.7092			6.59326	-0.0360276	10.3882	24.9538	-3.29805	-1.65158
-0.42658	18.2928	16.6279	1.80818	17.6978	5.65924	5.56573			6.63414	0.864578	13.1884	27.8192	-1.95219	-2.30039
-0.41649	19.1965	21.2254	1.73619	20.6567	8.02696	7.66636			6.70248	2.63584	15.76	30.5794	-0.0483735	-3.12163
-0.4064	19.6577	23.6067	0.872267	23.5741	10.155	9.69924			6.49552	3.73148	18.9241	33.7009	1.66133	-3.88497
-0.39631	21.3131	24.6734	1.39799	26.3397	13.0453	12.0967			6.89698	5.53545	23.953	37.0124	3.4869	-4.33308
-0.38622	24.7143	21.8836	3.28395	27.3056	16.9759	14.9937			7.33096	7.88466	26.9308	40.0964	5.59168	-4.64092
-0.37612	26.413	26.1157	6.11746	27.4848	19.4722	18.3745			7.89157	9.66476	30.5295	43.4107	7.55811	-4.70778
-0.36603	24.6323	31.0914	9.64317	33.4281	22.5509	21.7796			7.98495	12.5944	35.0649	46.8961	8.35682	-4.80242
-0.35594	27.7594	31.0794	14.5854	38.1679	26.1977	25.0477			8.33829	14.7617	39.8487	49.9432	9.18315	-4.74491
-0.34585	28.6015	31.1624	20.1004	39.0358	30.4004	28.61			8.79141	17.1086	45.0012	53.3422	11.6335	-4.23736
-0.33576	28.15	32.36	27.0501	42.3557	34.7133	32.3014			10.5996	19.6229	49.2851	56.1928	14.6458	-2.05422
-0.32567	32.2388	32.213	28.3788	45.6073	38.5465	36.4074			14.6209	22.3629	54.0675	58.8996	19.4763	2.41966
-0.31558	34.2156	35.3369	34.2092	49.949	42.4638	39.2787			21.0447	25.2504	58.844	61.648	24.6145	9.30642
-0.30549	39.2609	39.3484	38.3362	50.0844	46.5999	41.4954			30.2759	28.7468	64.895	63.7805	31.8202	18.9105
-0.2954	43.0002	39.1422	41.9333	54.0053	51.3757	45.5707			42.0487	31.8782	70.8225	65.5699	39.4899	29.6931
-0.2853	41.7726	43.4957	46.2255	59.0667	56.3456	50.7452			59.069	35.2749	73.6012	68.1298	47.9215	41.0803
-0.27521	43.7292	46.6958	53.266	61.3051	58.6011	55.8183			73.0977	38.9148	74.6984	71.6466	56.4411	52.9046
-0.26512	50.8585	48.3425	58.7887	61.8877	59.8669	59.8807			78.204	42.9478	77.9213	74.9879	63.5675	62.6175
-0.25503	53.4312	52.7631	66.4076	65.9506	62.5932	62.0309			78.447	52.9341	80.2839	77.6664	70.2698	71.3654
-0.24494	55.13	55.5099	68.1233	65.6867	64.4517	64.0342			79.688	67.2082	81.6987	78.5148	75.3195	77.0363
-0.23485	59.6858	59.7627	63.5557	67.9465	65.5723	65.4346			78.507	78.6947	81.4224	78.1811	77.8208	79.6966
-0.22476	61.9425	61.5129	63.6575	65.8276	66.3216	66.9711			76.0387	72.0761	80.2572	76.1271	78.2984	78.9802
-0.21467	63.7672	62.6443	60.8771	62.7487	64.5433	65.6176			72.2199	69.1606	78.9965	73.0722	77.2324	77.1872
-0.20458	61.2921	58.4375	57.5705	61.6272	63.5284	64.968			68.6797	70.2525	78.1959	69.096	76.2847	74.259
-0.19448	59.5528	51.8955	53.4507	56.8872	62.8852	63.9548			63.9128	64.5745	76.7687	64.9474	73.9299	69.6163
-0.18439	57.802	49.7631	50.1436	55.6117	61.7359	60.6294			59.1536	58.1655	74.691	60.8448	70.9573	64.1533
-0.1743	51.8378	48.1105	47.167	52.6445	60.0658	55.8731			54.1005	49.6027	72.6724	57.6213	66.8321	57.7999
-0.16421	47.5088	45.2018	41.5484	47.6886	58.4414	50.5584			48.4286	43.9084	69.438	53.5622	61.8244	50.4139
-0.15412	41.3908	46.2372	36.4727	43.0958	55.8394	45.1215			43.2522	38.0876	67.1271	48.5089	55.3767	42.5896
-0.14403	32.7901	40.8718	31.8903	40.9372	53.9843	40.5875			37.0014	33.2244	63.935	43.3483	48.6301	34.93
-0.13394	27.966	38.1047	29.1999	31.8883	51.4146	36.3465			31.0628	28.6686	60.1982	38.1883	40.8262	27.2537
-0.12385	21.9639	35.1787	24.4288	32.0562	48.4092	32.2357			25.1072	24.5854	55.9027	32.4941	33.5466	20.5046
-0.11376	18.8212	32.1687	20.4436	24.6504	44.9562	28.2421			21.5698	21.1624	51.9656	27.1577	28.0276	15.1155
-0.10366	14.7344	28.0017	17.265	23.0153	41.7644	24.5006			16.7833	16.7542	46.8398	22.297	23.6474	11.0599
-0.09357	9.42987	27.0798	14.154	18.236	37.6667	21.2918			13.0078	13.5736	41.2365	18.1632	20.1011	7.83052
-0.08348	7.60517	22.0667	12.8098	14.356	33.0833	18.7538			10.1988	9.79112	35.567	13.9662	17.1058	5.16281
-0.07339	7.07442	22.5086	9.00578	14.6233	28.5822	15.8281			7.77038	6.57872	30.9309	10.6579	14.377	3.35687
-0.0633	5.99321	18.6212	6.21184	9.73474	24.8738	13.247			4.89069	3.43719	26.8602	7.3527	11.8177	1.56319
-0.05321	4.18923	16.7359	5.03523	13.2163	21.5135	10.8456			2.63871	1.61844	22.3709	4.34529	9.60284	-0.39288
-0.04312	3.68729	10.0665	1.76142	5.26946	17.9072	8.75884			0.54672	0.00324198	19.9278	1.83255	7.27728	-1.83981
-0.03303	1.60415	10.8817	1.55284	5.6576	15.6374	7.41933			-0.48056	-1.25372	16.0424	0.0475352	4.89552	-2.88347
-0.02293	1.36685	7.1436	1.55505	4.1781	12.2311	5.32516			-1.78791	-2.33812	12.2655	-1.42703	3.0099	-4.06299
-0.01284	2.48392	5.38535	2.12847	2.43911	9.41118	3.94991			-2.64496	-3.89304	9.21063	-2.6076	1.25257	-4.78069
-0.00275	1.21657	4.87741	1.43382	3.70144	6.58811	2.6853			-3.21104	-4.36197	6.58754	-3.32391	-0.3465	-5.16912
0.00734	0.0201601	1.23753	1.90365	1.75975	4.47213	1.96081			-3.86831	-4.7205	3.33286	-3.81809	-1.85392	-5.27113
0.01743	2.39177	5.22829	2.59393	2.50717	1.60452	0.722943			-3.87413	-4.49647	1.53928	-4.03329	-3.48281	-5.22127
0.02752	2.31783	5.16948	2.30541	1.07335	0	0			-3.79799	-4.38798	-0.0801114	-3.87555	-5.14042	-4.99542
0.03761	2.00632	7.66987	2.64279	2.47356	-1.5136	-1.11292			-3.0549	-3.85368	-0.903879	-3.37121	-6.56636	-4.3305
0.0477	3.61714	6.31915	3.30389	3.37493	-2.22591	-0.971665			-3.22067	-2.43807	-1.79946	-2.58786	-7.56398	-3.92822
0.05779	2.31028	7.01439	1.23794	2.7828	-3.31209	-1.34831			-2.52426	-1.81075	-2.54306	-1.71087	-8.25203	-3.29336
0.06789	1.20413	4.63894	1.89104	2.27205	-3.92029	-1.33897			-1.23982	-1.44293	-2.75692	-1.00039	-8.5866	-2.61782
0.07798	3.77474	4.10242	1.71478	5.22082	-4.35502	-1.22803			-0.121288	-0.796471	-2.43	0.0672466	-8.86403	-1.69858
0.08807	4.03457	4.2733	2.68621	1.70931	-4.19518	-1.45195			0.877208	0.111485	-1.94813	1.26182	-8.92239	-1.26308
0.09816	2.16354	5.74464	2.58468	4.33187	-3.89495	-1.55049			2.70522	1.02536	-1.16542	2.6449	-8.23817	-0.017296
0.10825	3.89267	4.80218	1.6898	1.7485	-3.46858	-1.21548			3.08781	2.55604	0.284136	3.86441	-6.96889	1.2094
0.11834	4.56096	8.42538	2.5984	5.8729	-2.35142	-1.62486			3.66067	4.15241	0.908475	4.82904	-4.80518	2.76641
0.12843	4.5973	6.13792	1.93536	7.85068	-2.15242	-1.87316			3.7172	5.11913	1.72875	6.02569	-2.86142	4.42078
0.13852	4.49868	3.56299	0.530023	8.85916	-1.44082	-1.80114			4.70505	5.00209	2.22349	6.7832	-0.606178	5.68627
0.14862	4.46524	4.44322	0.315282	6.96803	-1.24515	-1.54428			5.09443	5.64324	2.4314	7.48256	1.7596	7.28855
0.15871	5.44335	5.63734	2.05587	4.94094	-0.85715	-0.795944			5.805	6.19728	3.09235	7.79925	3.8679	9.02296
0.1688	5.15303	5.11326	1.99772	8.25951	-0.292623	-0.284187			6.32702	6.23008	4.0343	7.93931	4.81868	9.47778
0.17889	4.90775	4.69161	1.47751	3.06126	0.577788	0			6.8793	6.86057	3.82744	8.01066	5.08548	9.78813
0.18898	7.26604	4.92548	0.838811	2.78657	0	-0.0789165			7.38631	6.92802	3.63913	8.27013	4.99611	9.44821
0.19907	8.1689	4.96216	1.77208	5.21486	-0.14322	0.077129			7.72309	6.77612	3.70104	8.10682	4.95852	8.96372
0.20916	8.19268	5.6888	2.58949	3.56169	0.0615144	0.472271			8.17137	6.90733	2.91594	7.93557	5.08416	8.50957
0.21925	9.12061	7.86404	0.306303	6.70903	-0.46659	-0.0698035			8.11497	6.39387	2.01988	7.62738	5.00505	8.12653
0.22934	7.0299	7.11964	1.30739	5.35464	-1.07542	0.201136			8.32033	5.97325	1.46112	7.38453	5.13272	7.86903
0.23944	8.37082	5.9356	1.36456	5.42591	-1.39792	0.23088			8.80956	5.59871	1.49383	7.42813	5.5429	8.15957
0.24953	8.03101	7.26272	1.25772	4.63835	-1.50554	0.393172			7.54576	5.36415	0.634993	6.81673	6.11533	8.17922
0.25962	6.54044	6.73796	1.75068	3.00982	-2.04822	0.339391			7.63955	4.60075	1.26388	6.49206	5.85444	8.16905
0.26971	9.70738	6.67661	3.58594	2.71115	-1.79195	0.370279			5.81052	4.65456	1.58565	6.24431	5.23871	8.09958
0.2798	7.98049	5.8172	3.29901	3.72395	-1.16165	0.29874			5.36284	4.4263	1.73058	6.21565	4.78536	8.0635
0.28989	8.1837	9.60724	5.00111	3.51214	-0.935437	0.3947			5.4149	4.36892	2.63892	5.92868	4.2852	7.61246
0.29998	7.1708	9.20206	2.53188	5.19753	-0.154381	0.394771			4.18502	5.10474	3.11558	6.06181	3.73032	6.9318
0.31007	7.76512	8.93492	4.78043	4.45136	0.692385	0.416448			3.60352	0.719628	2.47555	6.06032	3.3071	5.51291
0.32016	5.02346	13.716	4.53318	7.32324	0.243907	0.463938			3.04534	0.431038	2.251	5.90355	2.77331	4.26192
0.33026	6.93478	14.482	4.68423	4.47571	0.474225	0.805928			2.47921	0.36703	2.04197	6.1502	2.77841	2.15702
0.34035	6.29067	14.7513	3.08338	4.70853	0.315627	0.465361			1.65851	0.0750708	1.45587	6.12552	3.12833	0.269824
0.35044	6.22483	16.43	0.759369	3.074	0	-0.261703			1.10397	0.183372	0.786714	5.5751	3.19562	-1.76802
0.36053	8.72487	15.0977	1.8787	2.47175	-0.514686	-0.698783			0.231304	0.116701	0.500647	5.45555	3.25392	-3.6213
0.37062	7.75024	16.2457	0.0663626	3.0654	-0.647629	-0.698237			-0.436728	-0.862974	-1.37116	5.13602	2.60159	-5.80175
0.38071	5.64206	16.8222	1.15996	1.88675	-2.1203	-1.00277			-0.466096	-1.1085	-1.82099	4.68893	1.9722	-6.90941
0.3908	5.65795	13.2051	1.93358	3.88092	-2.31028	-1.17105			-1.08934	-1.74588	-4.25416	3.95614	1.30344	-7.73318
0.40089	4.35657	15.9372	1.92083	1.76739	-3.95332	-1.34964			-1.65559	-1.58931	-5.69011	3.31962	0.343833	-8.71846
0.41099	4.19446	14.5304	3.66677	3.96112	-4.86363	-1.09556			-1.71502	0.692404	-7.7648	2.48385	-0.383495	-10.1136
0.42108	7.20167	12.3078	1.95032	3.08406	-6.61768	-1.59994			-1.35041	1.03048	-9.41918	1.77795	-0.963297	-9.87951
0.43117	5.78389	10.0194	1.2985	0	-7.90054	-1.22578			-0.535408	0.648866	-10.766	1.05945	-0.709099	-8.40246
0.44126	4.2468	9.32799	2.41071	3.38235	-9.27113	-1.31381			-0.078936	0.731178	-13.6736	0.513374	-0.505877	-8.27114
0.45135	5.28025	7.83748	3.42709	0.99789	-11.0046	-1.26535			1.23076	0.120977	-14.0903	-0.08132	-0.406845	-6.96534
0.46144	4.59443	4.03444	1.68043	6.55463	-11.6407	-0.919731			0.364184	0.450072	-15.9784	-0.688572	-0.332354	-5.70746
0.47153	2.54928	3.1432	0.918982	5.2113	-12.9011	-0.122791			0.970456	0.330523	-17.8238	-1.2169	-0.390759	-4.01978
0.48162	1.22137	3.55956	0.137932	5.80917	-14.3352	-0.0698035			1.09602	0.514439	-18.718	-1.73255	-0.523036	-3.26821
0.49172	0.270364	0	0	3.27527	-15.2056	0.201136			0.889744	0.439774	-19.4215	-1.75259	-0.734213	-1.61589
0.50181	2.07241	1.39774	1.25248	3.13853	-15.9274	0.23088			-0.45924	0.74739	-20.0958	-2.13039	-1.01857	0.2424
Max Current	63.7672	62.6443	68.1233	67.9465	66.3216	66.9711		Max Current	79.688	78.6947	81.6987	78.5148	78.2984	79.6966	Average
Found	19.1937	19.8195	16.7659	16.8645	17.7701	17.4081		Unspiked	10.3207	10.8743	9.20009	10.9745	11.0952	10.3159	10.4634
Average	17.9703
RSD	0.0701492							Spiked Concentration		6
								Recovery	1.47883	1.49087	1.26098	0.981656	1.11249	1.18203	1.25114

## Sheet: Healthy-Quino-H
V	µA	µA	µA	µA	µA	µA
	SPE mod 1	SPE mod 2	SPE mod 3	SPE mod 4	SPE mod 5	SPE mod 6			Unspiked 1	Unspiked 2	Unspiked 3	Unspiked 4	Unspiked 5	Unspiked 6
-0.79995	-2.34125	-1.61758	0.771092	0.589868	0.638202	0.635116			-1.6816	-0.120508	1.22729	0.455514	1.01883	0.0639083
-0.78986	-1.65775	-0.879215	2.94533	1.67851	2.7418	2.72127			-2.16033	-2.18047	2.69573	0.000754398	0.066725	-0.423928
-0.77977	0.0198811	1.35721	1.20606	0.945668	2.89307	2.87121			-0.555802	-3.19741	2.74943	-0.0266783	0.877143	-0.602338
-0.76968	0.979279	2.36039	0.717977	0.557128	2.10266	2.08736			-0.537494	-3.57069	2.07846	0.579358	1.64337	-0.195472
-0.75959	1.36351	1.8817	0.83396	0.599807	1.53273	1.52188			-1.07883	-10.3095	2.05921	0.340585	1.236	-0.492805
-0.7495	0.622649	1.3101	0.503873	0.651863	1.10786	1.09841			-0.554246	0.269323	1.59712	-0.0155838	0.857588	-0.660505
-0.73941	3.93509	3.06168	0.187232	0.100129	0.0289696	0.0288421			-0.204086	-0.584292	0.154337	0.183169	0.926932	-0.556609
-0.72932	17.2307	10.1261	-0.0142624	-0.0169187	-0.0698521	-0.0659626			0.312739	-2.31206	0.025641	-0.0122247	0.517759	-0.597104
-0.71923	17.4356	10.3476	0.0977756	0.0595243	-0.176271	-0.17167			-0.491309	-3.30427	-0.685793	0.133685	0.814991	-0.641197
-0.70913	16.7219	9.87423	-0.0122533	-0.013664	-0.260064	-0.258867			1.03827	-3.3883	-1.01425	-0.00712512	-0.0125658	1.17365
-0.69904	16.2102	9.27001	-0.517529	-0.00444404	-0.406413	-0.401613			-1.49076	0.31693	-1.49202	0.229322	-0.0114594	2.39356
-0.68895	16.8803	9.30114	-0.175178	0.0412964	-0.412096	-0.405437			0.0521952	1.89501	-1.58675	0.828709	-0.0233957	3.47202
-0.67886	18.5361	9.64862	0.395843	0.145049	0.17181	0.172453			3.72117	-2.25756	0.171333	1.46977	-0.0245826	5.13728
-0.66877	18.4621	9.54068	1.28011	1.01662	2.75866	2.74129			5.94854	-0.64881	2.61046	1.52058	0.054971	6.65959
-0.65868	19.5585	9.8493	4.17062	1.87297	1.44027	1.43184			6.117	0.762913	1.36366	1.7978	0.240737	7.27392
-0.64859	19.6633	9.48524	5.40723	4.43664	1.00028	0.990355			8.63406	1.14197	0.949108	2.12656	0.496749	6.43447
-0.6385	19.4516	9.20379	8.63843	6.16279	0.640903	0.636306			10.1968	0.434521	0.884828	2.25246	0.582993	5.94716
-0.6284	20.2742	8.66953	9.49301	9.30893	0.589246	0.587592			11.936	0.075668	0.794173	2.1936	0.829363	6.87562
-0.61831	19.6128	8.44916	12.488	10.9956	0.293723	0.29136			13.3786	0.87046	1.05506	1.84983	1.03271	8.07378
-0.60822	19.7762	7.64751	13.122	21.455	0.0403132	0.0390833			15.7177	-0.56649	0.967311	2.72736	2.26869	9.73995
-0.59813	19.2783	7.2677	14.5358	27.2741	-0.0919287	-0.0913978			17.2652	-0.193168	0.528353	4.21886	3.92978	11.182
-0.58804	18.7052	6.72804	15.3792	24.4957	-0.124956	-0.119497			19.8642	-0.222861	0.371589	6.02945	5.50508	12.9709
-0.57795	17.0406	6.36576	15.607	33.187	-0.233361	-0.230391			22.3149	0.07833	0.297615	8.53709	8.65592	15.6226
-0.56786	17.2714	6.19808	17.5934	18.8721	-0.29808	-0.290191			25.3024	2.15116	0.403026	11.3117	11.7855	17.9115
-0.55777	14.7141	4.4631	19.6985	21.3455	-0.365345	-0.359469			27.3872	2.5044	0.399002	14.1089	14.0925	19.7892
-0.54768	13.3203	9.20808	22.3251	24.1241	-0.385734	-0.378924			30.0984	3.60834	0.181361	17.7374	18.4426	22.719
-0.53758	12.4985	11.1009	25.7817	26.8047	-0.383022	-0.376005			32.7794	5.05252	1.11527	20.4467	21.3522	26.0797
-0.52749	10.7914	12.6943	28.4175	29.3126	-0.404871	-0.397169			35.4542	6.31391	0.872417	24.8363	25.5371	28.0236
-0.5174	7.61967	17.2753	31.6448	32.3856	-0.368419	-0.362021			39.08	7.37321	1.35123	29.4105	30.7872	31.6068
-0.50731	6.1539	19.341	35.7658	34.7683	-0.340349	-0.335447			43.0195	8.93653	1.57879	33.5534	34.7719	35.8476
-0.49722	4.0798	22.3427	39.8216	36.8422	-0.106947	-0.103459			46.6517	10.836	2.6092	37.4533	38.4171	39.5283
-0.48713	3.26511	26.7733	44.3277	39.304	-0.0197271	-0.0189874			51.3154	13.1112	3.03911	42.1285	43.8258	43.4151
-0.47704	2.6841	32.2808	47.9845	41.686	0.0542547	0.0545315			55.2404	16.0271	3.28217	47.0683	48.6681	46.7493
-0.46695	2.1186	36.0851	52.2928	44.239	0.36875	0.366781			59.9392	18.868	3.85478	52.0274	53.6478	52.4324
-0.45686	0.860637	42.0204	56.5638	46.2114	0.616984	0.61322			63.5575	20.28	4.26051	57.4743	58.8155	56.25
-0.44676	-0.0514742	46.3258	59.5942	48.5959	1.01808	1.00695			68.1343	23.04	4.88959	61.2811	62.9963	60.0886
-0.43667	0.091744	51.3485	64.2928	51.0428	1.35329	1.34383			72.1558	26.801	5.15047	66.8929	68.5729	64.277
-0.42658	-0.130208	56.9834	-0.242671	53.3114	1.82665	1.81326			76.6171	30.9113	5.42678	71.7258	73.2845	69.1474
-0.41649	-0.0999814	62.876	-0.0872802	55.8421	2.51444	2.49353			81.1708	35.2205	5.98912	76.5937	78.6912	73.5347
-0.4064	-0.123962	68.0654	0	58.8907	3.30665	3.28415			85.306	39.2539	6.2421	81.2238	82.8032	77.7814
-0.39631	0.208884	74.0183	1.33293	62.6124	5.09806	5.06261			89.8086	43.1501	8.09285	86.0829	87.4701	82.5031
-0.38622	6.5802	80.0833	85.9854	68.2109	29.6408	29.417			93.144	48.2385	31.0682	90.4456	92.4122	86.0966
-0.37612	13.6685	86.5066	90.2432	75.988	44.5898	44.2546			96.4331	52.1128	44.8836	94.3544	96.38	89.3819
-0.36603	25.0605	92.8405	94.2895	83.8698	57.0361	56.6054			99.4998	57.1958	56.6088	98.5297	100.305	92.3688
-0.35594	20.7086	95.7237	99.0244	91.7282	65.9202	65.4253			102.148	61.4969	64.4667	102.113	104.301	94.8592
-0.34585	31.938	95.7613	103.067	99.5053	73.2607	72.7136			104.596	65.9598	71.1439	105.67	107.414	97.4301
-0.33576	47.2447	96.451	105.136	106.266	79.2218	78.6268			106.69	71.3514	76.1962	108.337	109.963	99.9231
-0.32567	65.3171	101.037	107.426	111.821	85.0264	84.389			108.783	77.1425	81.5602	109.663	111.58	102.516
-0.31558	85.2807	107.181	110.321	114.42	93.262	92.5652			109.76	83.4757	88.8989	111.745	113.295	104.987
-0.30549	105.551	115.355	113.862	116.982	97.667	96.9345			111.394	89.7496	93.1832	112.651	114.12	107.803
-0.2954	121.791	121.676	114.905	121.981	102.118	101.354			109.889	95.8246	97.0846	113.487	114.316	107.803
-0.2853	120.656	118.538	118.655	118.691	109.304	108.482			111.361	105.069	103.822	114.381	114.213	110.624
-0.27521	115.348	101.028	122.323	107.963	114.316	113.459			112.838	113.987	107.989	113.561	112.569	113.766
-0.26512	109.667	88.413	114.824	93.4522	118.806	117.914			102.736	109.538	112.029	112.071	109.69	104.468
-0.25503	104.943	88.3927	109.309	84.1865	122.01	121.093			94.788	102.078	115.11	109.809	105.915	99.2845
-0.24494	98.868	84.4378	101.738	76.578	118.344	117.458			89.4232	100.308	111.679	105.06	100.456	93.9442
-0.23485	89.131	78.6523	92.8068	70.5941	108.162	107.353			81.6397	96.8406	102.06	102.119	97.0992	87.2001
-0.22476	77.6887	73.0431	82.9413	65.9235	90.6976	90.0193			73.5169	92.3293	85.4489	97.5158	92.3602	78.764
-0.21467	65.1751	66.9551	73.3624	61.403	69.9773	69.4539			65.9808	86.8901	65.9233	93.3617	87.9399	71.3505
-0.20458	52.2103	61.1904	65.7278	56.5407	49.6694	49.2959			60.9684	80.0088	46.7948	88.5804	83.4986	65.2896
-0.19448	40.6847	53.5418	59.3051	52.0031	33.5881	33.3395			55.5981	75.1131	31.6472	83.7153	78.8118	58.8366
-0.18439	30.9868	48.8227	53.3222	47.9709	23.8797	23.6988			50.3941	70.916	22.4977	78.2918	74.2884	52.6068
-0.1743	22.2357	43.6436	48.1239	42.5114	4.05952	4.02671			46.0427	66.565	3.82926	73.7151	70.1149	47.6266
-0.16421	52.9782	38.0166	42.3351	38.7508	3.08714	3.06185			40.8793	61.8853	2.91077	68.0313	64.9846	41.5794
-0.15412	42.5285	33.6225	37.5697	35.0091	2.11146	2.096			36.9193	57.4388	1.99189	62.2712	59.3652	36.6939
-0.14403	34.1773	29.2889	32.635	31.4338	1.26376	1.25313			32.1377	53.3338	1.19473	56.8155	54.8175	31.9569
-0.13394	28.7878	13.1163	29.0793	5.43109	0.724531	0.721755			28.5868	49.7488	0.688494	53.2143	51.1725	27.9031
-0.12385	22.9003	10.7851	25.1527	4.63202	0.293785	0.29075			24.5031	45.2052	0.281538	47.9072	46.0123	24.1372
-0.11376	19.1043	9.71154	44.1957	22.0795	0.00220455	0.00283743			21.1799	41.7391	0.042752	42.4881	41.0524	19.6455
-0.10366	13.9086	7.71674	20.2515	18.7094	-0.0803471	-0.0786039			18.5186	37.4719	-0.311372	36.8325	35.8189	16.6647
-0.09357	10.7612	6.24095	18.7936	17.8989	-0.147705	-0.145817			15.7382	33.5528	-0.460227	32.7713	31.6026	14.5111
-0.08348	7.15721	4.21332	15.0579	17.1755	-0.165331	-0.161957			12.43	29.1789	-0.606177	27.765	26.8391	11.4282
-0.07339	5.60895	3.31495	12.6168	14.9911	-0.129478	-0.126728			9.94285	25.5667	-0.511099	24.0744	22.9374	9.29404
-0.0633	3.24772	1.91844	9.56393	15.553	-0.0918562	-0.0877874			7.70948	23.1567	-0.228557	20.0683	19.1098	7.61018
-0.05321	1.20664	0.726719	6.35288	16.3437	-0.0336064	-0.0329711			5.26236	19.9557	-0.0221286	16.2087	15.7713	5.75514
-0.04312	-0.0426414	-0.0237427	4.22699	25.7205	0.157672	0.15735			4.06518	17.1751	0.711444	11.7823	11.8105	4.5915
-0.03303	-0.0548414	-0.0238982	2.82696	26.0318	0.616984	0.613831			2.52291	14.965	1.54518	10.0903	10.1084	3.73158
-0.02293	-0.117052	-0.063625	-0.0295713	23.6186	1.15071	1.13949			1.22838	12.8054	1.73078	8.44803	8.46043	2.59564
-0.01284	-0.210006	-0.0971654	-0.123245	15.3981	1.36669	1.35505			0.106671	9.97458	2.468	6.12745	6.13303	2.15515
-0.00275	-0.21757	-0.10622	-0.366857	17.6149	1.54045	1.52959			-0.559171	7.86835	2.63464	5.15548	5.17038	2.37943
0.00734	-0.109302	-0.042768	-0.508257	18.9755	1.52475	1.51325			-0.356234	6.78044	2.98554	3.46035	3.47185	3.14733
0.01743	-0.0300315	-0.0771034	-0.665479	17.9985	1.17251	1.16191			-0.474307	4.97213	2.88147	2.12421	2.13228	3.47827
0.02752	0.301574	0.189372	-0.925865	16.7022	0.632985	0.626147			-0.269541	4.05182	2.67562	1.16702	1.04647	3.97961
0.03761	1.46932	0.784909	-0.868753	15.0982	0.0613237	0.0624641			0.289834	3.09126	2.21303	0.634272	0.485967	4.62092
0.0477	1.54869	0.91603	-1.13175	16.8616	-0.131414	-0.129474			0.0716352	2.56362	2.17375	1.19508	0.766715	4.81148
0.05779	2.35316	1.31407	-1.16137	15.3299	-0.270042	-0.26563			1.8212	1.99943	1.64622	1.74287	0.974135	6.17819
0.06789	2.77658	1.35355	-1.45411	15.3749	-0.313191	-0.306717			1.85345	1.55769	1.85252	2.00703	1.14967	5.87702
0.07798	3.03154	1.24786	-1.45489	12.232	-0.313087	-0.305375			2.43816	0.91574	2.01388	2.62745	1.30932	7.01152
0.08807	4.38378	0.780883	-1.70554	12.8943	-0.185814	-0.18606			3.68916	0.45917	2.61466	3.42877	2.00466	7.58251
0.09816	4.56559	0.447751	-1.70618	13.6947	-0.0244881	-0.0266149			3.99745	0.31326	3.52486	4.36506	2.44963	7.93693
0.10825	0.687104	0.181051	-1.78832	9.22049	0.595912	0.59165			2.70121	1.01897	4.27052	5.36784	2.57135	7.50672
0.11834	0.282367	0.0653789	-1.83186	13.6296	1.45377	1.44404			1.23541	1.4584	5.5137	6.1442	3.57673	7.35332
0.12843	-0.0558858	-0.0727574	-1.76311	12.5823	2.0451	2.02644			5.9994	2.58679	5.99935	7.22116	3.94474	9.92294
0.13852	-0.101504	-0.0878083	-1.67422	10.4677	2.14428	2.12738			5.3887	3.14625	6.38063	7.98237	4.56844	8.58339
0.14862	0.566509	0.335889	-1.58067	9.54619	1.75291	1.74101			1.94224	3.34139	5.69415	8.80616	4.9659	8.2988
0.15871	-0.0532701	-0.0464054	-1.50703	8.60615	0.924565	0.918331			2.90867	4.26227	4.86823	9.26757	5.45716	9.26711
0.1688	1.20132	0.774075	-1.40269	11.916	0.0358214	0.0333779			4.66762	4.78251	3.86877	9.6447	5.99204	9.22781
0.17889	1.33955	0.790681	-1.31878	12.3306	-0.204195	-0.200329			7.04888	5.89358	3.63581	9.88244	6.62372	10.0075
0.18898	2.12752	1.25887	-1.59506	11.833	-0.388922	-0.383897			5.81164	6.83142	2.90083	10.469	7.20182	9.58829
0.19907	2.21354	1.30729	-0.730806	15.0055	-0.557399	-0.548509			10.0742	6.8713	2.03131	10.5053	7.34705	11.5926
0.20916	2.78892	1.69602	0.0595192	17.419	-0.677739	-0.666766			9.3036	7.63056	1.42176	10.5217	7.49104	10.1955
0.21925	4.27506	2.55277	-0.792753	18.3219	-0.776581	-0.764387			5.31454	8.03889	0.874732	10.3034	7.52126	9.14329
0.22934	7.78857	2.67265	1.08783	16.046	-0.852664	-0.837886			5.79023	7.3816	0.412314	10.0637	7.32701	9.12256
0.23944	6.67644	3.13855	4.99564	11.6681	-0.815156	-0.802423			6.94474	7.73069	0.741571	10.1661	6.94701	9.26032
0.24953	7.08457	3.53858	10.1344	4.01323	-0.791671	-0.779297			8.44451	7.05778	0.617677	9.27613	6.87608	9.36287
0.25962	5.64285	2.64984	14.5004	4.62658	-0.689879	-0.675552			10.1761	6.826	1.3752	8.72066	6.062	9.33792
0.26971	7.21561	3.33431	11.8752	5.88325	-0.60268	-0.589321			-2.59249	7.0786	1.18127	8.15528	5.66977	5.8449
0.2798	7.28523	3.40391	20.6125	11.3507	-0.473606	-0.465542			7.07028	7.09402	1.51341	7.80857	5.39493	7.87434
0.28989	8.20276	3.63145	25.9733	12.176	-0.26644	-0.262498			7.49153	6.88353	2.24201	7.0388	4.79595	7.71812
0.29998	9.84016	4.55487	27.3545	5.66622	0.0581256	0.0582232			7.5433	6.66073	2.66231	6.82158	4.41982	8.5159
0.31007	10.7188	5.08979	27.4348	4.92999	0.57251	0.570374			4.89988	6.66699	3.05424	6.48542	4.4612	6.20667
0.32016	12.66	6.11411	28.3629	5.49262	0.93802	0.934287			4.19748	6.59311	2.80906	6.29128	4.52685	5.87771
0.33026	14.0387	7.08318	28.2475	4.58438	1.2275	1.22084			3.82656	7.16679	3.06146	6.48098	3.99676	4.92017
0.34035	17.2061	8.6673	28.1921	4.54256	1.31251	1.30259			2.97887	6.64413	2.92268	6.28414	3.71606	4.48218
0.35044	18.1297	9.64805	23.2149	3.95614	0.783774	0.777039			1.75079	7.10172	2.38813	5.60801	3.57844	3.77461
0.36053	20.057	11.1297	22.6987	3.10782	-0.20285	-0.199454			0.846346	6.59725	0.720794	5.70108	3.76331	3.19744
0.37062	19.5446	11.3756	20.4368	3.03279	-0.824967	-0.811525			0.398851	5.8251	-1.7282	5.21736	3.03829	2.23588
0.38071	19.9243	11.6929	18.6681	1.7193	-1.50727	-1.47847			-0.673133	6.0201	-4.59658	4.83598	2.91319	1.98244
0.3908	19.2896	11.3153	16.21	0.831911	-0.224554	-0.220313			-0.909408	5.5808	-0.105769	4.0524	2.68814	2.03142
0.40089	18.7757	11.0169	14.9936	-0.338752	-0.23746	-0.23572			-1.17148	4.74029	-0.513915	3.6757	2.73367	1.45656
0.41099	16.7363	9.82094	11.3606	-0.684557	-0.261513	-0.254881			-0.502608	4.70795	-0.479191	2.9318	2.59568	0.226228
0.42108	13.722	8.04467	9.03962	-0.773263	-0.308254	-0.303697			0.156998	3.91219	-0.727675	2.04343	1.73576	0.545523
0.43117	11.7838	6.91054	7.90322	-0.72082	-0.349168	-0.34041			1.27221	3.10599	-0.468019	1.45979	1.46374	1.84205
0.44126	8.88835	5.20088	5.13734	-0.588697	-0.354995	-0.348689			0.961459	-10.0362	-1.35765	1.45475	1.5011	0.516102
0.45135	5.96804	3.47411	2.06494	-0.629403	-0.414259	-0.410837			3.8011	-5.38011	-1.17015	1.25963	1.2631	1.38822
0.46144	4.12901	2.40576	1.61471	-0.599521	-0.426399	-0.418129			3.11172	0.50309	-1.57391	0.000174318	0.00168808	1.97092
0.47153	3.19499	1.86697	1.09603	-0.829404	-0.451602	-0.443392			2.97925	2.94068	-1.74582	0.733681	0.740978	1.83403
0.48162	1.88849	1.10626	0.814769	-1.10902	-0.442649	-0.435673			2.85176	0.775007	-1.50009	1.51916	1.52837	0.799627
0.49172	1.50764	0.877366	-0.020478	-1.35096	-0.423491	-0.41637			1.42251	-0.12994	-1.2023	0.881241	0.210626	-0.0149993
0.50181	6.33624	-0.00685152	0.126311	-0.00836254	-0.396105	-0.387172			0.0677184	0.37539	-1.06188	1.03043	0.195121	0.0631948
Max Current	121.791	121.676	122.323	121.981	122.01	121.093		Max Current	112.838	113.987	115.11	114.381	114.316	113.766	Average
Found	67.6462	66.5024	72.9466	69.5396	69.8327	60.6992		Unspiked	-21.4924	-10.0505	1.12502	-6.13275	-6.77948	-12.2552	-9.2642
Average	67.8611
RSD	0.0610265							Spiked Concentration		80
								Recovery	1.11423	0.956911	0.89777	0.945905	0.957652	0.911929	0.964067

## Sheet: Healthy-Quino-L
V	µA	µA	µA	µA	µA	µA
	SPE mod 1	SPE mod 2	SPE mod 3	SPE mod 4	SPE mod 5	SPE mod 6			Unspiked 1	Unspiked 2	Unspiked 3	Unspiked 4	Unspiked 5	Unspiked 6
-0.79995	10.7304	7.59143	6.22918	0.434877	-0.339646	4.11216			-1.44078	-8.64905	-1.1863	0.885928	-2.34726	0.64634
-0.78986	1.65896	0.994925	1.48382	0.926787	-0.216872	3.465			-1.71154	-6.89243	0.111047	0.0286536	-2.42764	0.102346
-0.77977	0.183654	0.880407	1.6427	0.518396	-0.479271	2.39463			2.29609	-4.7485	-5.10108	0.453208	-2.47211	0.0591478
-0.76968	0.564601	1.36259	1.83513	0.304675	-0.528189	-0.168609			2.56726	-4.09911	-5.76477	0.56125	-1.02314	0.372928
-0.75959	0.7545	1.1137	1.15882	0.354172	-0.451342	-0.175946			1.68022	-4.00158	-5.78039	-0.813973	-0.945675	0.0284991
-0.7495	0.396041	0.843916	1.00355	0.37047	-0.512658	-0.171288			2.44911	-3.49685	-4.85837	-1.58563	-1.12517	4.35305
-0.73941	2.04672	1.72427	0.604278	0.0610316	-0.476692	-0.168041			2.38061	-2.70697	-5.93683	-1.5223	-0.936238	2.11473
-0.72932	8.72652	5.52334	-0.138229	0.239996	-0.29855	-0.17076			2.65711	-2.02611	-4.33773	-2.76445	-1.023	-0.611922
-0.71923	8.81753	5.63312	0.0578553	0.433019	-0.212623	-0.167878			1.93749	-1.51211	-4.81245	-3.63118	-0.572709	-2.43617
-0.70913	8.44247	5.33719	0.00680132	0.427412	-0.068011	-0.166721			3.0739	-0.752059	-3.51807	-3.50465	-0.897113	0.59784
-0.69904	8.1637	5.06464	0.217951	0.760362	0.202927	-0.159983			0.41412	-0.218776	-3.16401	-2.6129	0.0160297	2.8186
-0.68895	8.13572	5.02411	0.0905051	0.776047	0.859961	-0.152575			1.39574	0.407454	-2.2942	-4.37586	-0.625364	3.41318
-0.67886	9.35042	5.71681	0.185865	0.969682	1.27296	-0.151956			3.74867	0.216468	-1.11102	-2.38132	-0.263294	4.90948
-0.66877	10.14	5.92973	0.581152	1.3247	2.73116	-0.150119			5.31489	0.0319743	-1.14353	-3.01135	-0.986196	6.8372
-0.65868	11.6355	6.51978	1.83758	1.73084	2.29624	-0.147461			4.90338	0.0221488	-1.33954	-1.20825	-0.827175	7.38753
-0.64859	12.3816	6.4349	2.36054	3.56489	2.80169	-0.151976			6.3445	0.0766814	-0.873505	-0.987145	0.0441496	4.81336
-0.6385	12.7479	6.93809	3.7415	4.33248	3.02447	-0.144386			7.23282	-0.0132746	-0.0853735	-0.0904805	-0.080601	4.30777
-0.6284	14.3623	7.27523	4.15148	6.2779	3.65221	-0.144913			8.21199	-0.0872243	0.225144	-0.349392	0.680174	5.60463
-0.61831	14.5604	7.6515	5.43448	7.59257	4.19471	-0.132624			9.11559	-0.00363888	0.933319	1.70724	1.71687	7.35438
-0.60822	15.778	7.13424	5.72668	13.5993	4.65072	-0.143838			10.9505	0.195955	1.33131	2.31202	2.51456	8.58389
-0.59813	15.3473	6.64196	6.30921	16.7616	4.13955	0.818741			11.882	0.0212907	0.968377	4.57313	3.26285	10.7626
-0.58804	16.492	5.62407	6.70311	15.5995	3.95596	0.309727			13.6422	-0.0499675	1.2926	5.99606	4.72703	12.3589
-0.57795	16.2423	5.57681	6.86114	20.6382	4.48278	0.0655764			14.5708	10.5716	0.992377	7.74938	5.43504	13.6712
-0.56786	17.2947	6.09602	7.72419	13.4056	4.27327	0.178513			16.7376	8.30536	0.740744	10.0376	8.09346	16.8847
-0.55777	16.8188	5.10083	8.64721	12.0287	4.80258	-0.00874758			17.9552	3.24703	0.873769	13.1002	8.99896	18.6755
-0.54768	15.8426	7.11708	9.80867	13.5949	4.55908	0.179173			19.5867	3.52469	1.11248	16.2195	12.1738	21.5101
-0.53758	16.1379	8.22755	10.9095	15.1061	5.34712	-0.0130402			20.6387	4.18003	2.2009	19.1273	14.5484	24.6038
-0.52749	15.5789	9.37963	12.6242	16.5193	5.49449	1.44903			22.4585	4.47195	1.07998	21.8991	17.0395	27.2073
-0.5174	14.9496	11.9383	14.9293	18.2514	6.35634	2.40128			24.5891	4.61128	0.889614	25.4539	20.535	30.2519
-0.50731	14.3467	12.8063	17.3148	19.5934	7.27171	3.65282			25.817	5.225	1.19316	28.8583	23.1299	33.0971
-0.49722	13.5181	13.9991	19.7463	20.763	8.2219	5.47704			26.7375	5.48265	1.12808	32.2228	26.155	37.2938
-0.48713	13.52	16.3744	23.4832	22.1505	9.89109	7.68699			28.8255	6.64394	1.53636	35.5507	30.0898	40.4975
-0.47704	13.3153	20.043	27.7878	23.4931	10.9158	10.4506			30.9871	8.79357	3.04773	39.3108	33.3097	43.2644
-0.46695	13.9213	21.8916	30.5344	24.9316	12.2299	13.6057			32.9851	12.4059	5.41253	42.9866	36.7172	47.8379
-0.45686	13.3989	26.1592	35.3164	26.0433	14.2593	17.2819			34.506	18.307	11.0719	46.7457	39.7071	51.1969
-0.44676	13.3241	28.1554	37.7626	27.3872	17.3287	21.3998			37.022	26.2084	16.4264	50.0994	42.9276	54.5957
-0.43667	13.2308	31.0103	42.3951	28.7659	24.7152	25.8821			38.5769	33.7534	25.4992	53.1203	47.115	57.5509
-0.42658	14.2683	33.7462	17.7071	30.0446	32.9196	30.7469			40.0791	41.7543	34.8872	57.1647	50.956	61.0289
-0.41649	15.7522	37.4719	40.5556	31.4704	38.2626	36.1724			42.2448	49.2925	41.8437	60.0833	54.8461	64.5803
-0.4064	39.6211	42.2532	46.9234	33.188	39.6479	42.4164			44.608	55.4852	44.6316	63.6847	58.222	68.6914
-0.39631	50.3262	48.8032	57.2394	35.2852	42.438	56.9366			47.4527	61.5565	49.4773	65.8348	61.403	71.3754
-0.38622	60.5426	58.0579	71.6495	38.4399	49.3976	71.2655			52.0181	66.7579	56.719	68.6801	65.7897	76.0274
-0.37612	75.4461	38.6665	55.2185	42.8209	56.9566	86.4741			59.0962	70.538	63.3667	71.3494	70.2699	80.4521
-0.36603	89.6538	53.0478	67.9217	65.4825	64.4046	93.5976			66.3345	75.8016	67.6984	73.822	76.5872	85.316
-0.35594	70.8197	40.7133	76.6426	72.8007	71.2842	96.735			73.5284	79.9454	70.6256	75.9836	82.4448	89.0973
-0.34585	79.1904	48.6606	79.8096	78.7801	77.2562	98.4425			80.4951	80.6636	76.2313	80.0389	86.7396	93.3056
-0.33576	82.5508	55.845	81.7848	87.2582	86.4834	102.15			86.9779	84.1615	82.0557	85.304	93.1561	96.8734
-0.32567	84.1095	69.3432	89.6834	94.5108	89.8445	106.606			94.0153	89.4381	90.713	91.6091	101.369	102.814
-0.31558	87.9704	86.2298	96.3739	102.756	98.4751	112.391			100.867	96.8569	100.607	97.6842	107.584	108.136
-0.30549	95.0714	104.496	107.909	109.329	106.635	115.252			109.461	111.8	113.815	101.295	111.786	111.736
-0.2954	99.7865	115.706	115.771	115.246	115.272	115.702			114.043	114.126	113.708	106.697	113.995	113.703
-0.2853	108.984	114.203	111.002	115.722	115.751	114.013			110.136	105.864	106.763	114.047	114.016	113.166
-0.27521	114.404	108.681	102.513	115.48	114.06	110.652			98.9393	85.962	94.9657	112.952	113.161	113.44
-0.26512	115.835	99.7705	88.0212	114.799	110.693	104.949			83.9993	61.915	74.5226	106.113	112.438	112.266
-0.25503	108.22	89.0832	71.0702	112.389	104.958	96.2561			73.6827	44.0947	52.0177	96.0855	110.971	110.905
-0.24494	92.7752	110.492	51.3558	108.522	96.3064	84.1208			68.1642	29.5893	38.0452	84.8078	108.302	109.553
-0.23485	69.4931	88.7049	68.1781	102.553	84.1701	69.4737			62.3121	19.2907	25.0585	75.5744	105.742	105.327
-0.22476	50.2071	70.8319	59.0449	87.3968	57.0108	54.1502			57.8579	16.7179	16.9274	69.4063	96.9604	99.5496
-0.21467	58.3428	55.682	48.6819	85.2053	41.7164	39.0336			53.6469	13.0759	11.412	63.1856	87.1684	94.528
-0.20458	41.3689	44.2603	39.5014	68.8193	26.5911	26.8331			50.4854	10.5401	7.71799	57.7986	78.0139	89.078
-0.19448	34.2329	47.3839	42.4365	55.0533	14.4001	16.704			47.2796	6.93939	4.58477	52.3541	68.2726	83.5069
-0.18439	23.3807	39.6825	37.0952	46.8181	10.7485	9.55559			44.2906	4.78383	1.78051	47.4066	59.9888	77.8387
-0.1743	15.8973	33.5812	32.1649	43.2543	5.0348	0.269054			40.5788	2.9968	0.967518	42.6335	52.4461	73.2623
-0.16421	29.3738	27.6653	28.3419	38.0904	5.01466	0.246627			37.6543	1.55178	-1.83592	37.5029	44.701	68.0445
-0.15412	21.6011	23.3761	23.7627	34.1611	5.51305	0.285037			34.5833	0.26432	-2.66957	33.8405	38.8043	61.3675
-0.14403	17.5332	18.6154	20.7778	30.4518	6.04136	0.283941			31.0055	-0.741374	-2.81411	31.144	34.6777	54.7414
-0.13394	14.5944	8.24043	12.7651	12.902	7.41028	0.317186			28.239	-1.46768	-2.48237	28.2814	29.9912	48.3049
-0.12385	11.8746	5.82954	11.0461	11.0368	8.51928	0.317328			24.6642	-1.98897	-2.11945	25.4424	25.7975	42.6231
-0.11376	9.9974	5.30696	9.02888	19.2928	9.30707	0.298453			23.0952	-2.29447	-1.70553	22.3592	21.5095	36.9369
-0.10366	7.73376	4.23594	8.55108	10.5432	5.08753	0.346057			20.0315	-2.40892	-1.5713	16.6662	18.5819	32.3118
-0.09357	7.06118	3.4663	7.93909	10.0555	2.76683	0.366262			16.8181	-2.21392	-0.269476	15.376	15.2802	27.5716
-0.08348	4.82453	2.43302	6.37755	9.62466	0.259718	0.355687			14.4671	-2.55092	-0.0271165	13.1404	11.3933	23.0169
-0.07339	4.27382	1.93482	5.3356	8.39369	-0.365763	0.396695			12.4532	-2.86266	0.0033389	10.8036	7.60109	18.2187
-0.0633	3.29896	1.1632	4.06072	8.65592	5.08526	0.372442			9.82483	-3.17191	0.951249	8.7087	4.48808	15.0562
-0.05321	2.13677	0.507788	2.68411	9.05531	2.75142	0.368778			7.69021	-3.39097	0.88696	6.19245	2.0608	11.4405
-0.04312	1.704	0.109138	1.80916	14.1355	0.259533	0.387948			6.29321	-3.1656	1.85166	4.1565	-0.181851	7.63785
-0.03303	1.79707	0.088319	1.20003	14.2765	-0.36693	0.429139			4.59605	-2.46896	1.94639	3.14314	-1.30167	4.64374
-0.02293	1.73711	0.0870862	0.0428342	12.9428	-0.774791	0.431493			3.67704	-1.38234	1.81167	2.27405	-3.01799	1.74756
-0.01284	0.519998	0.0946235	0.0781447	8.44061	-0.799608	0.41757			2.24278	-0.422813	2.09624	1.68779	-4.10045	-0.16807
-0.00275	0.113058	0.0883284	0.172227	9.63583	-1.03279	0.492066			1.72589	0.0129169	2.80479	0.667755	-5.16844	-2.06818
0.00734	0.0550607	0.0250592	0.21403	10.3418	-1.18833	0.472937			1.09096	0.0259862	2.69446	0.927848	-5.30397	-3.29526
0.01743	0.0323373	0.0417405	1.27071	9.80871	0.261233	0.500428			0.646004	-0.318354	2.7965	0.328317	-5.44494	-3.82473
0.02752	0.159182	0.145265	0.401595	9.10161	-0.36738	0.516888			0.487413	-0.623418	2.69261	0.115087	-5.43007	-4.90385
0.03761	0.742274	0.426287	1.16771	8.22773	-0.777975	0.499809			1.02621	-0.981742	2.54491	0.0671967	-5.50684	-3.95699
0.0477	0.782909	0.65507	0.480956	9.18807	-0.802106	0.525321			1.17711	-0.737503	3.0261	1.26009	-4.60244	-3.89548
0.05779	1.30177	0.716481	1.67151	8.41417	-1.03663	0.519984			1.47276	-0.553977	3.03658	1.8031	-3.69376	-2.51499
0.06789	1.42002	0.736244	1.59495	8.4336	-1.18801	0.544389			1.98603	-0.498002	3.21656	2.21302	-3.29872	-1.79611
0.07798	1.55822	0.693878	0.614119	6.69313	-1.17419	0.550904			1.87436	-0.0972518	3.041	2.64039	-1.55166	0.212
0.08807	2.26455	0.444687	2.06931	7.05528	-1.10976	0.258906			2.47368	0.71186	3.96581	3.18525	-1.10175	1.36532
0.09816	2.36576	0.259334	1.35336	7.48115	-0.945387	0.268952			3.19435	1.6961	3.65194	3.97616	-0.127072	3.04761
0.10825	0.378011	0.122121	0.96495	5.0368	-0.944077	0.258662			3.25558	2.51886	4.23028	3.22017	0.341559	4.46769
0.11834	0.160361	0.0574223	1.36579	7.43214	-0.595463	0.270282			3.7177	3.99817	4.56092	4.45892	1.5075	6.86729
0.12843	-0.167284	0.0645207	1.31197	7.4281	-0.525844	0.315775			4.62137	5.4257	4.84866	6.28386	3.52465	7.91175
0.13852	-0.109081	0.0682661	0.642364	6.38966	-0.606325	0.291928			5.36703	6.24711	5.68453	6.73958	4.0913	8.87055
0.14862	0.285173	0.200362	0.665499	6.59455	-0.402568	0.291582			5.59169	6.91538	5.51184	5.63818	5.96777	11.9046
0.15871	-0.0669822	0.025162	0.526177	6.08094	-0.26371	0.348005			6.51388	7.54455	5.7761	10.6901	6.16957	13.75
0.1688	0.53358	0.983128	0.591371	8.36705	-0.00582542	0.323508			7.01611	7.48199	5.87011	10.1658	7.26892	13.8439
0.17889	1.2559	1.4615	0.558299	8.85029	0.20176	0.346341			8.06377	8.41826	5.77155	8.27351	8.07511	14.2974
0.18898	1.92146	1.84311	0.677947	8.66225	-0.286756	0.350116			8.81929	8.35391	5.85208	16.9535	8.30732	13.9971
0.19907	2.32633	1.91156	0.313812	10.3815	1.39239	0.413216			9.46048	8.6559	5.21409	8.01446	8.17064	14.7751
0.20916	3.14571	2.67669	0.0469661	11.9436	2.18272	0.425465			10.2182	8.37817	4.9383	9.64159	8.83382	14.0592
0.21925	4.10997	3.44755	0.34818	12.4765	3.48337	0.422725			10.1326	7.4477	4.51416	8.85493	8.97674	13.4351
0.22934	6.47618	4.09504	0.461168	11.1192	4.16633	0.451211			10.6613	6.74499	3.49276	8.98366	8.66725	12.5085
0.23944	6.34179	4.71482	2.12642	8.69393	5.6228	0.451941			11.3012	7.06422	3.69444	9.48073	8.07684	12.3345
0.24953	7.38752	5.44114	4.32408	4.51464	0.606642	0.465479			11.0415	7.99637	1.89808	7.46736	8.01386	12.9548
0.25962	7.42559	5.2238	6.20465	4.21306	0.595411	0.441184			12.4386	9.44456	2.15545	5.42118	5.81869	11.7255
0.26971	8.28022	5.86174	5.0521	4.66335	0.544006	0.498561			10.8033	4.42706	0.396818	6.87919	5.05235	11.388
0.2798	9.59832	6.19725	8.79726	7.41583	0.552811	0.497201			10.605	4.50077	0.32864	6.51535	4.50666	9.90539
0.28989	10.0827	6.22884	11.0906	7.51932	0.433856	0.4697			10.3211	5.38935	-0.605344	3.75767	3.1802	8.24019
0.29998	12.339	7.06242	11.6972	3.65713	0.358299	0.499089			9.70457	7.27627	-1.57219	3.31889	2.17641	7.81153
0.31007	12.4458	7.30988	11.7272	2.88231	-0.171599	0.526377			9.28103	-3.47578	-2.08123	5.09179	1.11683	6.11868
0.32016	14.1679	7.75688	12.1358	3.10366	-0.0921215	0.539407			8.5457	-5.05978	-4.38669	1.56854	0.687792	5.84964
0.33026	14.8145	8.16064	12.128	2.62065	0.145973	0.559835			7.96292	-7.06326	-4.53918	0.392674	-1.08173	4.71273
0.34035	17.0306	8.59088	12.0969	2.60504	0.413707	0.56085			6.8074	-8.26996	-4.7266	1.79256	-1.95931	4.43279
0.35044	17.6097	8.87447	10.0046	2.29627	0.145851	0.604851			5.65352	-8.76012	-4.34927	1.64393	-3.48501	3.59507
0.36053	18.2721	9.32684	9.81293	1.82732	0.102534	0.587508			4.02307	-9.42337	-4.50778	0.993736	-3.5866	3.01312
0.37062	17.6059	9.07544	8.87079	1.71305	0.116406	0.580516			3.11148	-8.23257	-3.12705	1.76275	-4.95553	1.53093
0.38071	18.2477	8.98449	8.12045	0.979248	0.00979777	0.621321			1.71676	-5.90999	-3.1825	2.64486	-5.80562	1.65204
0.3908	16.4855	8.06367	7.09364	0.480676	-0.0122856	0.620104			0.844692	-3.17374	-1.94629	0.886882	-6.35691	1.78429
0.40089	15.8167	7.21878	6.57919	0.180331	0.0369182	0.65206			-0.0836462	7.00911	0.0344023	2.5297	-6.35352	1.41845
0.41099	13.555	6.27001	5.04392	0.376318	0.0654208	0.677836			-0.26939	4.08101	1.67124	2.08605	-6.2089	0.167173
0.42108	11.7538	4.7568	4.07541	0.42492	-0.000939049	0.657215			-0.252637	1.61255	3.1868	0.518277	-6.67707	0.537102
0.43117	9.732	3.6854	3.59678	0.396735	-0.0171794	0.655743			-0.571895	-0.901585	5.01372	3.72715	-6.97518	0.91382
0.44126	7.33358	3.10276	2.39829	0.324661	0.126675	0.656078			-0.248858	-3.00503	5.50278	3.89745	-6.57983	0.0598499
0.45135	3.00661	1.89218	1.1363	0.347209	0.0692396	0.565355			1.054	-4.86055	4.37807	3.13346	-6.27128	-0.658129
0.46144	2.08759	0.750114	0.904241	0.330529	0.090033	0.49643			-0.551785	-6.20476	1.98238	5.72904	-5.13988	-0.577813
0.47153	1.61674	1.01152	0.625457	0.454923	0.0243255	0.522997			-0.260235	-7.79	-0.43178	5.03609	-3.21807	1.68632
0.48162	0.950733	0.136373	0.467917	0.606879	-0.0160122	0.467265			-0.346172	-9.55974	-2.65582	7.34841	-1.44012	0.866376
0.49172	0.765626	0.00296078	0.0753255	0.737362	0.0443408	0.390383			-1.08904	-10.4444	-3.47121	8.62031	0.534771	2.88108
0.50181	3.29554	0.00379204	0.0555206	1.71091	0.0869104	0.192386			-2.74553	-10.799	-3.68426	6.91752	2.54326	6.61146
Max Current	115.835	115.706	115.771	115.722	115.751	115.702		Max Current	114.043	114.126	113.815	114.047	114.016	113.703	Average
Found	8.34857	7.06612	7.71019	7.21887	7.50698	7.02358		Unspiked	-9.49868	-8.66959	-11.7636	-9.45505	-9.76917	-12.8855	-10.3403
Average	7.47905
RSD	0.0670115							Spiked Concentration		20
								Recovery	0.892363	0.786786	0.97369	0.833696	0.863807	0.995454	0.890966

## Sheet: Healthy-Stigma-H
V	µA	µA	µA	µA	µA	µA
	SPE mod 1	SPE mod 2	SPE mod 3	SPE mod 4	SPE mod 5	SPE mod 6			Unspiked 1	Unspiked 2	Unspiked 3	Unspiked 4	Unspiked 5	Unspiked 6
-0.79995	2.20783	1.00382	1.08672	0.716423	-0.564795	-1.50745			-3.53703	-1.59537	-6.3074	0	-1.9248	0
-0.78986	0.402975	0.43032	0.994896	0.68211	0	-1.14944			-0.799164	0	-4.33862	-4.55693	-1.66622	0
-0.77977	0.734976	0.201998	0.442757	1.0062	-1.62842	0			-0.702014	0.650269	-3.73102	-5.20956	-1.9248	0
-0.76968	1.42447	0.339895	0.427917	0.165165	-1.86163	0			-1.06495	0.492911	-3.61927	-5.65986	-2.29664	0
-0.75959	1.13782	0.367759	0.614796	0.185978	-2.02255	0			-1.00988	0.114917	-3.15474	-4.79034	-2.4312	7.08794
-0.7495	0.84051	0.225096	0.828037	0.214442	-1.71182	-5.7885			-1.22683	0.103251	-2.44955	-5.38914	-2.82265	2.74758
-0.73941	1.76231	0.87546	0.23513	0.069446	-1.9258	-2.32617			-0.836986	-0.279218	-1.83898	-4.10443	0.078852	0.943656
-0.72932	6.43723	3.48416	0.016107	0.059956	-1.46671	-2.32774			-0.599242	-0.350312	-1.36433	-4.28413	-1.13345	-0.722292
-0.71923	6.47438	3.54435	0.270585	0.085059	-1.53093	-1.92497			0.0241416	-0.281087	-0.8646	-3.1355	-1.72932	-1.27219
-0.70913	6.17998	3.36453	0.208068	0.080938	-1.12046	-1.95924			-0.0677304	-0.619536	-0.427704	-2.88924	-0.855156	-0.927192
-0.69904	5.80866	3.1455	1.24276	0.080717	-1.03247	-1.53628			0.210622	-0.493867	-0.105264	-2.05245	0.658332	-1.48529
-0.68895	5.85795	3.49238	1.51432	0.075348	-0.733439	-1.16827			0.375746	-1.02199	-0.023248	-0.998673	0.96684	-1.18082
-0.67886	6.08741	4.06194	2.01453	0.113971	-0.356873	-1.1987			0.502358	-0.763244	0.017824	-1.02556	0.41718	-1.81436
-0.66877	6.01878	4.18795	1.98556	0.0455975	-0.36648	-1.06642			0.599062	-0.741038	0	-1.2021	-0.13752	-1.02655
-0.65868	6.18522	4.32643	2.94529	0.0449995	-0.429564	-1.11421			0.740592	-0.83985	0.052552	-0.781847	-0.686568	-0.814128
-0.64859	5.98328	5.31098	3.43472	0.483867	-0.279391	-1.27693			0.799157	-0.378775	-0.021672	-0.320433	-1.3866	0.784356
-0.6385	5.80099	5.85564	4.3507	0.504751	-0.114512	-0.990692			0.780898	0	-0.084096	0	-1.38593	0.77928
-0.6284	5.46301	6.73845	4.59081	0.989449	0	-1.17813			0.558014	0.595045	-0.16252	0.176732	0	1.92923
-0.61831	5.33924	7.588	5.27593	0.995456	0.063154	-1.26771			0.68328	1.78773	0.144072	0.401531	-0.254964	1.44373
-0.60822	4.82989	7.32682	5.40655	3.92765	0.143489	-1.06851			0.550505	2.24936	0.011912	0.113364	-0.48078	1.70442
-0.59813	4.57251	8.35105	5.94758	5.00223	0.0405106	-0.966182			0.235829	3.49297	-0.052048	0.432369	0.485412	2.34896
-0.58804	4.22881	9.22521	5.84277	3.56632	0.154513	-1.09791			0.0189648	4.85382	9.01104	-0.130985	0.096444	2.02196
-0.57795	3.99654	10.1357	5.21368	5.2059	-0.0468078	-1.43449			-0.0925056	6.23484	5.24779	-0.64787	1.70408	1.54595
-0.56786	3.90091	11.0429	5.30437	6.6663	-0.231517	-1.20485			-0.226231	7.5391	0.168296	-0.742135	1.58418	1.35461
-0.55777	2.80265	12.1512	5.14151	4.75661	-0.265203	-1.28887			-0.716926	9.23771	-0.036088	-0.413117	2.0759	1.67262
-0.54768	2.85987	12.1183	4.80371	3.80243	-0.147628	-1.08023			-0.66983	10.855	0	-0.219819	1.64434	1.54585
-0.53758	2.41422	13.2981	4.99503	4.59885	-0.0785486	-0.71443			-0.487066	12.4848	0.134024	-1.09044	0.946956	1.20277
-0.52749	1.5403	14.1461	4.76522	4.32578	-0.38967	0			-0.228017	14.5966	0.381168	-1.5373	0.806664	1.47029
-0.5174	1.33656	15.2648	4.70489	4.78044	-0.549351	0.591692			-0.159437	16.1479	0.69992	-1.37393	-0.8169	1.18921
-0.50731	1.06699	15.6157	4.74511	4.84744	-0.490968	1.31041			0	17.5146	0.951944	-1.5301	-1.58165	1.18624
-0.49722	0.846081	16.686	4.41396	3.19392	-0.54678	2.31503			0.391925	19.3575	1.75078	-1.25698	-1.33956	2.48478
-0.48713	0.488079	17.5488	4.11556	4.6159	-0.449181	3.52125			0.947736	21.1061	3.34769	0	-0.947928	2.73792
-0.47704	0.772074	18.335	3.15944	3.59913	0	4.55177			1.86913	23.0431	6.77032	1.87026	-0.7647	3.56459
-0.46695	1.31549	19.1643	3.31988	2.57516	0.66834	5.77508			2.74365	24.5966	12.6757	6.76236	0.032988	4.77899
-0.45686	1.95118	19.9892	2.7211	1.63793	2.41652	7.14383			4.66075	26.619	19.8597	11.3158	0.42054	6.76679
-0.44676	1.94941	20.7088	2.06443	0.470451	4.04368	9.11083			8.09515	28.7275	27.1465	19.4275	2.4053	9.31094
-0.43667	2.91251	21.4549	1.79147	0.358384	6.94239	12.1671			13.3858	30.5418	33.7247	27.9205	3.62362	11.2101
-0.42658	3.21346	22.2566	1.45104	1.50828	9.97736	13.663			19.028	32.6285	40.0602	34.1793	5.4194	13.0369
-0.41649	4.18119	23.0763	1.31617	3.33568	12.214	15.2481			24.7463	35.0784	45.8653	37.0757	7.79003	16.9577
-0.4064	5.06363	23.3868	0.937013	5.81582	13.249	16.9189			30.6062	37.9864	51.477	41.2497	13.5942	20.1841
-0.39631	6.03208	24.4705	1.01428	6.58232	14.7405	18.4221			36.3991	42.4856	55.8717	47.8096	23.3347	24.2802
-0.38622	8.27995	25.1504	1.78801	5.60869	17.0847	20.9108			42.3963	49.0483	59.421	53.9497	32.9606	28.8367
-0.37612	10.2787	26.8172	1.67207	6.69326	19.2789	23.1775			47.8442	55.6817	63.8726	57.7969	42.1315	35.026
-0.36603	14.6114	28.0021	2.80813	5.89243	20.6537	23.8662			52.9445	62.1958	68.097	60.8302	50.1673	41.0468
-0.35594	16.1839	30.2054	4.07576	7.68243	21.7376	25.5078			57.7621	68.7764	69.1489	66.0179	57.5703	46.092
-0.34585	19.7023	30.7312	5.94389	8.50406	23.5915	25.894			62.1588	74.5697	72.875	71.6707	63.4913	55.0963
-0.33576	21.5673	31.4537	9.15827	7.17055	25.6115	27.9069			67.7693	80.7111	78.3827	79.4548	70.4551	66.0658
-0.32567	24.6402	31.9703	13.2606	7.50099	28.3931	31.8441			81.689	87.4808	85.2961	88.6124	78.1223	77.9896
-0.31558	27.2835	32.7483	12.3791	8.61831	31.6656	37.7006			96.4078	95.1608	98.5502	100.25	88.3418	90.4575
-0.30549	30.9789	33.5051	12.7394	11.0916	35.8242	42.4151			100.592	99.7723	100.894	100.394	97.5666	101.271
-0.2954	33.5954	35.1157	19.2328	16.7054	35.8758	42.5127			97.7892	96.7633	93.2931	94.2453	104.11	106.652
-0.2853	38.2075	36.8919	25.6133	25.7066	33.6785	40.2207			90.5893	86.7971	75.4791	84.214	104.256	107.176
-0.27521	41.4713	36.2189	28.9272	33.4145	30.0938	36.8572			79.9446	73.5642	54.2123	66.1908	100.36	104.018
-0.26512	40.0286	33.2155	28.8113	31.2969	23.6532	32.0051			68.7205	65.3049	38.0245	46.1227	90.5655	101.517
-0.25503	37.0027	28.7198	26.3617	23.2568	16.4819	25.8244			59.0291	59.2709	25.4307	33.678	78.9133	97.2845
-0.24494	31.506	24.9681	22.0733	18.8751	12.0348	20.295			50.4578	54.7006	16.5444	22.1451	67.2516	95.4593
-0.23485	24.6269	22.3966	18.8093	18.1833	7.91352	16.4871			42.8686	51.6877	14.4383	15.0488	56.2517	88.4999
-0.22476	16.3522	20.485	14.5333	16.3972	5.37766	13.5703			36.7346	48.904	11.207	10.1452	46.9211	80.945
-0.21467	20.1524	18.5822	18.8311	12.7443	3.62537	12.1182			31.7138	45.8715	9.15314	6.86118	38.4123	75.9515
-0.20458	17.0353	16.3969	15.0362	13.0178	2.45184	10.64			26.8465	43.1587	6.23414	4.07208	31.0588	69.337
-0.19448	14.0196	15.482	11.9667	7.73221	1.45515	8.9655			22.7441	40.5735	4.29479	1.57787	25.3594	60.8925
-0.18439	26.9256	13.5822	15.5044	5.98686	0.563852	7.42195			19.268	37.2604	2.68558	0.857718	19.1187	52.1822
-0.1743	22.7962	12.0289	13.2265	4.26627	0.306511	6.50027			15.5964	34.6384	1.38729	-1.63857	15.537	44.1826
-0.16421	19.2154	14.709	11.89	3.07458	-0.585543	5.61868			12.8183	31.5689	0.231032	-2.38171	11.4068	36.4824
-0.15412	16.2767	12.9779	10.0697	1.64648	-0.851102	4.35975			10.5218	28.5234	-0.68124	-2.50679	9.25075	29.4603
-0.14403	14.371	10.6851	9.37593	1.97893	-0.895799	3.6285			8.02022	25.5948	-1.32824	-2.2141	6.36666	23.0978
-0.13394	12.5117	9.67235	8.2406	1.54417	-0.791203	3.3371			6.13151	22.6849	-1.79713	-1.89057	4.2688	19.3644
-0.12385	10.9715	7.71097	7.70959	1.32025	-0.675594	2.5732			2.94056	20.0764	-2.12711	-1.55192	2.4476	14.6736
-0.11376	9.55507	8.23806	6.87696	1.88033	-0.554583	1.41545			0.220133	16.9157	-2.28555	-1.40245	0.727968	10.3988
-0.10366	8.38344	6.83241	5.41899	0.256366	-0.501163	0.934507			1.44791	14.5257	-2.18059	-0.338538	-0.387744	7.11556
-0.09357	7.60055	4.9051	5.3132	1.49196	-0.120981	0.380968			0	12.5246	-2.30155	-0.053023	-1.06759	3.8165
-0.08348	5.92355	3.71426	4.20762	2.6216	-0.0189488	0			-0.508219	10.4384	-2.58177	0	-1.64503	2.47121
-0.07339	5.47936	3.45552	3.54334	1.07178	0	-0.130242			-0.288166	8.16908	-2.85749	0.736007	-2.61809	-0.111984
-0.0633	3.98456	2.24174	3.03771	2.40568	0.263013	-0.343504			-0.420458	6.66183	-3.06202	0.687956	-2.79888	-1.3879
-0.05321	3.6724	1.65191	1.90882	3.00784	0.245838	-0.557392			-0.55296	5.15698	-2.85383	1.17585	-3.02328	-2.0568
-0.04312	2.78314	1.54145	1.81003	5.4642	0.420191	-0.940572			-0.379836	3.84123	-2.22679	0.921519	-3.1171	-2.0504
-0.03303	3.37082	1.52295	1.36406	7.25274	0.3293	-0.999236			-0.432288	3.09219	-1.25289	1.06232	-3.24046	-1.09769
-0.02293	2.84047	0.914084	0.379918	6.70995	0.379616	-0.0748335			-0.686196	2.05423	-0.387432	0.875874	-3.55525	-0.518376
-0.01284	2.98646	0.503415	0.280728	5.11027	0.312993	-0.482926			-0.930607	1.57863	0	1.49959	-3.54758	-0.438624
-0.00275	3.40622	0.571648	0.355026	5.56011	0.535876	-0.490203			0.46715	0.998414	0.018056	1.09754	-3.38117	0
0.00734	3.30877	0.301249	0.535822	6.40239	0.392205	-0.429205			-1.20847	0.590074	-0.29132	0.991678	-3.72292	0.312408
0.01743	3.32743	0.291978	0.562639	6.21498	0.354377	-0.467715			-0.435348	0.440482	-0.694176	0.646238	-3.55216	1.52929
0.02752	3.36744	0.291445	0.639436	5.37201	0.230935	-0.608776			0.528314	0.447651	-1.19988	0.454257	-3.03253	1.54424
0.03761	4.15181	0.65016	0.809543	5.3325	0.162328	-0.439638			-0.575676	0.413618	-1.56314	0.441566	-2.82923	1.82333
0.0477	3.90466	0.44081	0.940457	4.95028	0.157797	-0.294584			0	0.329332	-1.77066	0.437623	-1.59072	1.25305
0.05779	4.61801	0.563042	1.01917	4.81249	0.156382	-0.256862			0.273427	0.0927976	-1.81289	0.283892	-0.990612	1.69249
0.06789	4.85819	0.893958	1.0497	5.35813	0.101452	0			0.592546	-0.208145	-1.68913	0	-0.518484	1.63102
0.07798	5.08987	0.766609	1.16957	4.16356	0	-0.183998			-0.192434	-0.204728	-1.3405	0.719125	0	0.948084
0.08807	5.07468	0.82198	1.45011	4.67336	0.256979	-0.228182			-0.296748	-0.187909	-0.898952	0.197072	0.740508	0.71046
0.09816	4.42331	0.864597	1.5176	5.03279	0.0704262	-0.37619			0.152172	-0.259413	-0.496056	0.650445	1.02499	0.201912
0.10825	4.95364	1.03019	1.62296	4.1447	0.232435	-0.455861			0.414871	-0.314126	0	0.580388	1.1872	0.882192
0.11834	4.64997	1.12332	1.80833	5.51277	0.207399	-0.402245			0.704938	-0.147175	0.386152	0.895645	2.06708	1.8406
0.12843	4.67183	1.47207	2.25876	4.8253	0.32006	-0.560955			0.35105	-0.218591	0.666392	1.39794	2.31	1.76509
0.13852	5.07887	1.71397	1.93131	4.48687	0.499551	-0.658773			0.0455976	-0.416377	0.823776	1.51202	2.75416	1.32318
0.14862	5.4813	2.4148	2.06146	4.47917	0.540316	-0.753602			0.616572	-0.158658	1.04496	1.78201	2.55421	0
0.15871	4.9493	2.14266	1.67889	3.84021	0.6368	-1.00454			0.574265	-0.376578	0.39576	2.0049	3.054	-0.363732
0.1688	5.52856	2.61644	1.76754	4.74741	0.716451	-0.994518			0.404662	-0.0125633	0.564432	1.42053	3.40633	-0.570192
0.17889	5.44186	3.12342	1.869	4.53703	0.507621	-1.2975			0.18666	0	0.011952	1.50302	2.93242	-1.04628
0.18898	5.75183	3.2311	1.83811	3.67101	0.537103	-1.08062			0	0.337267	0.30736	1.12137	1.9672	-0.826668
0.19907	5.89483	3.34511	1.7746	4.22351	0.40072	-1.5804			0.872597	0.517723	-0.087072	1.0023	2.01929	-1.12614
0.20916	6.002	3.85052	1.70858	4.72027	0.358173	-1.46962			0.609415	0.533623	-0.558552	0.759067	1.90898	-0.78708
0.21925	6.70163	3.98907	1.66705	4.68876	0.27125	0			1.03812	0.847932	-0.733792	0	0.787344	-0.823704
0.22934	6.59945	4.36158	1.99175	3.74483	0	-1.05065			1.39221	1.35695	0	0.0238935	0	-0.078324
0.23944	6.46889	4.48554	2.86951	2.23146	0.0085436	0.0851865			1.58815	1.38606	1.53609	-1.40009	-0.628848	0.434832
0.24953	6.81182	4.71265	3.60561	0.030693	-0.500323	-0.564599			1.60959	1.96947	3.52712	-1.46804	-1.93129	0.681552
0.25962	6.1288	4.31546	4.25604	0.0530205	-0.524605	0.137025			1.71498	1.95987	-0.733792	-2.58799	-1.71493	1.63204
0.26971	6.52346	4.80098	4.69536	0.366158	-0.924815	0.367622			1.4784	2.48477	0	-2.51682	-1.99432	1.47114
0.2798	6.1403	4.63631	5.62495	1.75201	-0.899384	-0.041972			1.56758	2.49112	1.53609	-3.28714	-3.60672	1.16423
0.28989	6.23444	4.7802	6.54059	1.97696	-1.17465	0.390092			1.21566	2.63237	3.52712	-3.58666	-4.19088	0.683724
0.29998	6.79281	5.11296	6.40464	0.153218	-1.28169	0.256112			1.22646	2.33289	-5.78262	-3.96175	-4.40815	0
0.31007	6.96177	5.03437	6.53691	0.202131	-1.41573	0.541842			1.03903	2.71683	-7.04177	-5.5184	-5.26909	-0.512172
0.32016	7.35782	5.43505	6.60302	0.221787	-1.972	0.0873565			0.840902	2.54425	-8.6077	-5.63922	-5.41999	-1.62524
0.33026	8.30474	5.5501	6.36661	0.263263	-2.01517	0.292467			0.823162	2.28284	-9.39891	-5.61813	-6.03066	-2.73017
0.34035	8.83221	5.94594	6.40963	0.272779	-2.00764	0.657727			0.429775	2.02971	-10.003	-5.25256	-6.25776	-3.80675
0.35044	9.96366	5.98792	5.36749	0.296537	-1.877	0.268803			0.0101808	1.5111	-9.93342	-5.2787	-6.09294	-5.82354
0.36053	10.2881	6.21897	5.25252	0.326306	-1.88634	0.196115			-0.490802	1.39908	-8.2257	-4.00802	-5.02364	-6.98236
0.37062	10.4042	5.95659	4.61715	0.342778	-1.43226	0.435148			-1.06286	0.75336	-6.3074	-3.85249	-4.731	-9.43523
0.38071	10.6347	5.79826	4.39773	0.381518	-1.37668	-0.009142			-1.21569	0.247061	-3.44814	-2.3754	-4.53528	-11.3818
0.3908	10.1893	5.45797	3.79275	0.385398	-0.848851	-0.562142			-1.55339	-0.396083	5.90011	-0.316939	-2.91558	-12.6033
0.40089	9.58575	5.23974	3.63774	0.416533	-0.113261	0.679283			-2.54107	-0.788758	3.33426	1.03508	-1.04171	-14.2711
0.41099	8.48813	4.39775	2.81812	0.458068	0.369886	-0.573359			-2.39379	-0.828054	0.882912	2.43886	1.42361	-15.7671
0.42108	6.93644	3.59967	2.16784	0.458055	0.87153	-0.761884			-2.87288	-1.54661	-0.963304	3.7173	3.64859	-15.885
0.43117	6.13008	2.80769	1.69812	0.459303	1.32837	-0.706699			-3.01272	-1.60927	-2.91441	4.87982	5.30008	-17.3762
0.44126	4.72154	1.94825	1.3415	0.454597	1.74379	-1.55785			-3.14235	-1.76603	-4.60362	3.51881	6.88709	-18.0414
0.45135	2.96926	1.21898	0.269339	0.463385	1.25744	-1.24356			-3.52387	-2.10425	-5.78262	1.69695	8.92392	-17.8604
0.46144	1.54731	0.874306	0.187936	0.445822	0.606406	-1.49227			-3.94126	-2.23425	-7.04177	-0.391238	9.05358	-20.1827
0.47153	1.55687	0.685587	0.193851	0.435402	-0.139807	-1.63795			-4.24557	-2.33812	-8.6077	-2.54782	6.94764	-19.6368
0.48162	0.839943	0.44811	0.178829	0.422065	-0.91046	-1.92226			-4.83492	-2.50186	-9.39891	-3.45932	4.29492	-17.7903
0.49172	0.569511	0.377191	0.168266	0.404625	-1.23619	-1.84251			-4.67395	-2.52803	-10.003	-3.67214	1.43906	-17.3944
0.50181	0.000853411	0.0682623	0.153818	0.386562	-1.31224	-1.80597			-4.77574	-2.4061	-9.93342	-3.54558	-0.600564	-15.0605
Max Current	41.4713	36.8919	28.9272	33.4145	35.8758	42.5127		Max Current	100.592	99.7723	100.894	100.394	104.256	107.176	Average
Found	67.1837	71.4177	78.7816	74.6328	72.3572	66.2209		Unspiked	12.5226	13.2807	12.2441	12.7056	9.13557	6.43522	11.054
Average	71.7657
RSD	0.0652539							Spiked Concentration		50
								Recovery	1.09322	1.16274	1.33075	1.23854	1.26443	1.19571	1.21423

## Sheet: Healthy-Stigma-L
V	µA	µA	µA	µA	µA	µA
	SPE mod 1	SPE mod 2	SPE mod 3	SPE mod 4	SPE mod 5	SPE mod 6
-0.79995	6.83069	13.0386	1.55652	2.15952	0.837692	0.382038			-1.66622	0.124998	0.982344	0.977832	-2.99013	0.707664
-0.78986	0.80641	6.20331	1.82577	1.38339	0.0701289	0.0202124			-1.9248	0.0236975	1.60273	0.0839171	-2.29049	0.109545
-0.77977	0.738738	2.18981	0.146663	4.42537	0.722493	0.006957			-1.66622	0.103598	0.982344	0.844799	-2.99013	0.0640341
-0.76968	0.140316	0.215545	0.126137	2.07513	1.33235	0.488466			-1.9248	0.659538	1.60273	1.5522	-2.29049	0.408944
-0.75959	0.036993	0.122727	0.19547	0.699776	1.00608	0.295209			-2.29664	0.600677	1.22418	1.17271	-1.89122	0.0270711
-0.7495	0.116347	0.159742	0.353188	0.109248	0.699588	3.48302			-2.4312	6.49728	0	0.815346	-1.73642	0.00438826
-0.73941	0.151382	0.215743	0.081059	0.015144	0.757854	4.59062			-2.82265	2.51862	-0.412008	0.886998	-1.62883	0.015057
-0.72932	0.213598	0.198352	0.170896	0.140832	0.430119	4.42994			0.078852	0.865018	-0.006672	0.49687	-1.37105	0.000129675
-0.71923	0.197714	0.265001	0.287639	0.18944	-1.42135	3.80245			-1.13345	-0.662101	-0.90348	0.76523	-1.1931	-2.2501
-0.70913	0.060478	0.256168	0.525096	0.18296	-0.950265	3.35796			-1.72932	-1.16618	-1.38068	0.002835	-0.825418	-1.07598
-0.69904	0.040282	0.252098	2.93229	0.164864	-0.535194	2.46247			-0.855156	-0.849926	-0.787944	-2.56475	0	-0.269871
-0.68895	0.182831	0.193556	2.87674	0.174688	-0.077481	2.0792			0.658332	-1.36151	-1.02431	-4.64511	-0.576862	-0.584031
-0.67886	0.616869	0.573166	3.94349	0.164592	-0.110205	1.09568			0.96684	-1.08242	-0.797784	-3.37881	-0.244926	-0.604601
-0.66877	0.881111	0.792517	4.08806	0.118064	0.258426	0			0.41718	-1.66317	-0.949332	-3.97784	-0.958496	0
-0.65868	2.97966	1.84022	4.54411	0.15364	0.994257	-0.243081			-0.13752	-0.941006	-0.821904	-2.59118	-0.967175	0.472259
-0.64859	2.0276	4.35726	5.47507	0.103384	0.718947	-1.21663			-0.686568	-0.746284	0.23922	-2.64605	-0.373593	-0.118608
-0.6385	2.21489	5.28839	6.05008	0.07832	0.296919	-1.94817			-1.3866	0.718993	-0.311916	-1.94738	-0.563563	1.00339
-0.6284	2.53269	6.23101	6.5223	0.197608	0.589788	-2.10022			-1.38593	0.71434	7.55298	-2.13783	-0.070939	2.43622
-0.61831	2.63211	7.56923	6.78193	0.07968	0.081765	-1.81723			0	1.76846	0.421104	0	0.713625	4.02
-0.60822	2.67812	13.0182	7.24541	0.622704	0.112986	-2.204			-0.254964	1.32342	0.878808	0.906098	1.50538	5.28025
-0.59813	3.56371	18.254	7.72866	0.864368	-0.043236	-1.81111			-0.48078	1.56239	0	2.75382	1.87149	6.98137
-0.58804	3.87703	18.2059	7.54172	0.731096	-0.315495	-1.1236			0.485412	2.15322	0.567216	4.00634	3.37359	8.80871
-0.57795	4.02623	22.6273	7.16892	0.117792	0	-0.78795			0.096444	1.85347	1.54618	5.8089	3.72271	10.2876
-0.56786	4.434	27.5258	7.66334	0.200824	1.27911	0.468261			1.70408	1.41712	1.68658	7.90662	5.90493	13.265
-0.55777	4.84231	32.5949	7.71669	0.536576	2.57758	1.96055			1.58418	1.24172	2.51326	10.1658	6.63411	15.2613
-0.54768	4.58146	37.0653	6.51041	0.454288	3.73341	3.32288			2.0759	1.53324	0.222288	13.3518	9.32634	17.8119
-0.53758	5.06185	28.1434	8.08461	0.261376	4.58575	5.3856			1.64434	1.41703	6.98053	15.8953	11.264	20.6006
-0.52749	5.21694	30.7854	7.27231	0.147752	7.50854	7.06797			0.946956	1.10254	11.9321	18.4014	13.723	23.6191
-0.5174	5.83141	33.915	7.34903	0.65404	9.64438	8.99896			0.806664	1.34776	13.7958	21.7914	16.5547	26.5492
-0.50731	6.14393	35.3205	8.05802	1.45764	11.3067	11.0931			-0.8169	1.09011	16.6087	24.6921	18.8963	29.2279
-0.49722	6.54416	37.3746	8.24165	1.38086	13.759	13.2648			-1.58165	1.08738	18.6672	27.7364	21.8803	33.5037
-0.48713	6.09291	40.5683	6.64628	1.72233	16.5259	15.4288			-1.33956	2.27772	19.9618	30.923	25.0727	37.0469
-0.47704	7.4797	42.3498	5.07477	1.91553	19.7577	17.4991			-0.947928	2.50976	19.0001	34.2483	28.0374	39.8512
-0.46695	10.4259	44.3306	5.40078	2.58834	22.5024	19.7863			-0.7647	3.26754	18.9672	37.3257	30.9103	43.1451
-0.45686	15.8102	46.2715	3.99585	3.00377	25.2335	22.9244			0.032988	4.38074	21.5646	40.6643	33.8285	46.1462
-0.44676	16.3459	48.6406	2.33197	2.75172	28.5774	25.9483			0.42054	6.20289	23.4329	44.0036	36.782	49.6206
-0.43667	21.2615	50.4276	1.48301	3.20853	31.7414	28.8517			2.4053	8.53503	26.323	46.7047	40.6207	52.7857
-0.42658	23.3226	52.0482	2.08947	4.60647	35.0365	31.7886			3.62362	10.2759	27.1956	50.169	44.0544	55.9429
-0.41649	21.0791	53.8675	1.53165	5.97474	37.8265	34.9138			5.4194	11.9505	29.6132	52.9862	47.3604	59.3923
-0.4064	24.7727	54.9085	2.81281	9.52842	41.0601	38.3763			7.79003	15.5445	31.6528	56.1776	50.8171	63.2817
-0.39631	28.8669	56.7264	6.56695	11.8173	44.8897	41.3762			13.5942	18.5021	33.3105	58.0804	53.8459	65.7479
-0.38622	33.5119	58.565	12.9667	14.6828	48.2033	45.1809			23.3347	22.2569	36.2821	60.9874	57.7242	70.0283
-0.37612	39.1592	61.3223	24.1012	19.4461	51.4746	48.0301			32.9606	26.4337	37.5837	63.4934	61.8746	74.1029
-0.36603	28.2803	63.7775	35.9546	22.0308	54.8557	51.9918			42.1315	32.1072	39.551	65.5948	67.7143	78.5847
-0.35594	31.0544	67.5298	24.2233	20.6446	58.0268	55.1434			50.1673	37.6263	41.1143	68.0542	73.2417	82.0732
-0.34585	37.2187	69.0767	28.7724	22.2351	61.6188	58.2776			57.5703	42.251	42.6967	71.6354	77.4508	85.9522
-0.33576	43.3302	70.4789	33.7966	21.7805	63.8858	61.3896			63.4913	50.5049	45.356	76.5915	83.6122	88.6665
-0.32567	50.4825	72.0945	41.1742	23.1792	65.9305	64.3096			70.4551	60.5603	62.5025	82.4073	91.0084	93.2985
-0.31558	55.5642	72.8043	35.8739	20.9843	68.3868	66.715			78.1223	71.4905	73.2621	87.6776	96.779	97.2139
-0.30549	61.7306	72.8945	34.5412	27.1736	68.3952	68.7571			88.3418	82.9194	84.4428	90.7348	100.49	99.153
-0.2954	66.2808	73.1701	49.8807	38.3327	69.9175	69.6329			97.5666	92.832	98.1718	95.4123	102.846	99.9414
-0.2853	74.3436	76.255	64.1273	55.513	70.4122	70.4533			104.11	97.7641	99.9627	101.32	102.985	98.7039
-0.27521	80.1448	77.5488	72.4905	70.306	71.3023	70.7315			104.256	98.245	96.6219	99.6439	102.183	97.6598
-0.26512	77.4758	75.066	75.0539	65.9836	71.3181	69.1861			100.36	95.3499	102.202	92.5508	101.715	96.4756
-0.25503	72.0393	66.8275	73.0741	50.4121	71.2458	68.6832			90.5655	93.0575	96.6785	82.3396	100.436	93.9073
-0.24494	62.2328	57.3256	66.6519	41.8122	71.7193	69.0579			78.9133	89.1774	80.8992	71.8148	98.1939	91.8
-0.23485	50.6583	50.5205	58.7717	40.2672	73.0495	68.8669			67.2516	87.5043	58.692	63.1459	95.836	87.8274
-0.22476	36.5537	46.0427	47.6613	36.0888	70.9534	67.6237			56.2517	81.1249	48.1524	57.6057	87.9401	83.9913
-0.21467	28.3959	41.221	38.2103	27.8594	68.1206	65.482			46.9211	74.1996	38.4143	52.1286	79.3441	80.4365
-0.20458	41.1298	36.4738	28.8363	22.1108	63.124	62.9139			38.4123	69.6222	32.2422	47.604	71.0394	76.3822
-0.19448	34.0547	33.6371	28.7738	15.9891	55.9551	59.2764			31.0588	63.5589	27.926	42.879	62.166	72.5943
-0.18439	28.5354	28.7727	21.205	11.5045	50.2626	55.8382			25.3594	55.8181	24.823	38.9736	54.424	68.5999
-0.1743	24.7621	36.8982	16.9771	9.1345	44.4556	50.8359			19.1187	47.8337	21.8602	34.99	47.5233	65.1637
-0.16421	21.3528	32.5885	11.294	5.56901	39.4803	46.3439			15.537	40.5007	17.9702	30.5415	40.1723	61.3496
-0.15412	24.3808	37.2374	7.13757	2.65559	35.3367	42.9894			11.4068	33.4422	14.6393	27.7969	35.2172	55.9122
-0.14403	23.4658	30.8097	3.94462	0.948288	32.0179	38.8521			9.25075	27.0053	13.1387	25.6054	30.9375	50.0837
-0.13394	18.4057	26.3834	2.67201	0.342424	28.0935	34.4057			6.36666	21.173	10.2686	22.9399	26.6161	44.3136
-0.12385	17.2149	29.952	0.668052	0.253152	25.1491	30.2809			4.2688	17.7507	8.58024	20.6922	22.9557	39.217
-0.11376	12.3255	22.9729	0.746581	0.745144	21.2738	25.8326			2.4476	13.4508	5.72546	18.3486	19.0949	34.0092
-0.10366	10.9319	17.8274	0.182776	0.196192	18.3699	22.0133			0.727968	9.53227	4.68006	13.6074	16.4523	29.7647
-0.09357	10.8768	10.994	0.267949	1.51419	15.4801	18.1781			-0.387744	6.52259	2.4579	12.3417	13.4519	25.3956
-0.08348	6.92573	6.69394	0.465817	3.27322	12.6042	15.1176			-1.06759	3.49846	0.545424	10.7139	10.0866	21.2003
-0.07339	6.86191	3.60188	0.535623	0.72028	9.89425	12.0301			-1.64503	2.26527	0	8.59695	6.77784	16.2431
-0.0633	3.72208	2.24052	0.181544	1.64484	7.82353	9.38439			-2.61809	-0.102652	-0.88728	7.00659	4.08852	12.9901
-0.05321	5.11266	1.64106	0.143209	2.2303	6.54748	6.69911			-2.79888	-1.27224	-2.12411	5.17448	1.86856	9.57808
-0.04312	2.41537	2.08284	0.062425	1.47473	4.79263	4.60306			-3.02328	-1.8854	-2.02088	3.7377	-0.17501	5.84217
-0.03303	3.83067	1.9974	0.154627	4.03944	2.87335	2.13459			-3.1171	-1.87954	-2.92931	2.81993	-1.19199	2.70331
-0.02293	1.91762	1.51524	0.052811	3.58856	1.42186	1.52142			-3.24046	-1.00621	-3.58204	2.03418	-2.76146	0
-0.01284	1.26816	0.515042	0.078925	4.29507	0.115074	-0.117027			-3.55525	-0.475178	-3.99228	1.50682	-3.74582	-2.12693
-0.00275	11.9972	1.91512	1.48145	3.55294	-0.103482	-0.711477			-3.54758	-0.402072	-3.74412	0.593534	-4.72394	-4.31444
0.00734	11.5553	1.5132	1.91381	2.9995	-0.524574	-1.86369			-3.38117	0	-3.69764	0.8274	-4.84363	-6.12443
0.01743	11.9696	1.82461	2.37049	3.0039	-0.861075	-2.45841			-3.72292	0.286374	-3.4414	0.289411	-4.96729	-6.95908
0.02752	11.9868	1.42007	2.50096	1.47808	-0.188478	-2.64801			-3.55216	1.40185	-2.98634	-0.0047565	-4.95715	-8.38862
0.03761	13.814	1.87787	3.16778	2.04716	-0.595422	-3.06212			-3.03253	1.41556	-2.76568	-0.439394	-5.38684	-8.11667
0.0477	11.4334	1.76089	4.75104	0.755544	-0.521586	-2.57487			-2.82923	1.67138	-1.94123	0.133235	-4.83703	-8.33287
0.05779	15.4715	10.9266	5.58676	1.33214	-0.156708	-3.09134			-1.59072	1.14863	-1.8021	0.175445	-4.16864	-7.51353
0.06789	16.7586	12.3108	5.05162	3.25535	0	-2.52865			-0.990612	1.55145	-0.654168	0.324282	-3.95536	-7.22721
0.07798	15.9616	11.7241	5.5372	3.40524	0.399033	-2.47513			-0.518484	1.4951	0	0.19277	-2.49355	-6.10507
0.08807	16.0731	13.4155	6.40329	5.11063	0.888102	-2.12162			0	0.869077	0.153204	0.0339465	-2.63867	-4.94627
0.09816	16.1533	14.4265	3.27921	2.87751	0.683595	-2.25957			0.740508	0.651255	1.28878	-0.0284655	-2.11398	-4.07891
0.10825	18.2301	7.48976	3.85398	3.93673	0.90252	-1.76136			1.02499	0.185086	1.06369	-1.5295	-1.78197	-3.22142
0.11834	17.9179	6.43844	3.99457	4.64905	1.08082	-1.25667			1.1872	0.808676	1.81864	-1.02274	-1.50328	-1.313
0.12843	19.6784	8.02773	7.82865	3.9122	0.751275	-1.53526			2.06708	1.68721	2.05966	-0.299156	0	-0.849797
0.13852	21.0181	8.26209	4.36831	4.42378	0.875088	-1.31116			2.31	1.618	1.99786	-0.513933	0.015554	0
0.14862	8.34549	8.73389	4.99877	4.69988	0.6687	-1.05566			2.75416	1.21291	2.05772	-2.17769	1.40605	2.14964
0.15871	8.37536	7.63082	4.20851	3.73393	0.300501	-0.916434			2.55421	0	2.23667	1.98517	1.18952	3.00258
0.1688	9.3357	8.84231	4.55072	3.37805	0.254547	-0.726453			3.054	-0.333421	2.74184	1.24222	1.80178	3.37224
0.17889	9.5333	9.20119	2.36145	2.71851	0.066168	0			3.40633	-0.522676	1.87235	-0.702775	1.97298	3.45122
0.18898	9.97514	8.9407	2.59608	1.09326	0.219465	-0.482481			2.93242	-0.95909	1.53986	6.61798	1.71466	3.12674
0.19907	10.4495	0.54186	2.49306	0.781656	0.407601	-0.410301			1.9672	-0.757779	1.95545	-1.44972	1.4702	3.82944
0.20916	10.651	2.25017	2.41931	0.713192	0.638388	-0.41787			2.01929	-1.0323	0.773796	0	1.96076	3.27966
0.21925	11.5645	1.20482	2.17073	1.38654	0.129861	0.142686			1.90898	-0.72149	0.121692	-0.530754	2.06183	2.75841
0.22934	11.637	1.77837	1.85791	1.30094	0	0.15741			0.787344	-0.755062	0	-0.22828	1.92741	1.99273
0.23944	11.5469	2.11344	2.03711	1.0439	-0.854019	0.11295			0	-0.071797	-1.93736	0.147956	1.71202	1.95199
0.24953	11.8417	2.87103	2.3725	0.592584	-0.226953	0.175824			-0.628848	0.398596	-1.84838	-0.930909	1.7147	2.82957
0.25962	12.6465	3.32684	2.23597	0.591968	0.438687	0.350253			-1.93129	0.624756	-2.4936	-2.3074	0.379698	2.19437
0.26971	13.8379	4.67942	2.33808	0.586312	0.491796	0.167013			-1.71493	1.49603	-3.43684	-0.526859	0	2.40099
0.2798	12.6624	5.59767	2.62667	0.606704	0.865674	-0.207918			-1.99432	1.34855	-4.88286	-0.566559	-0.268147	1.48687
0.28989	13.9524	5.53004	2.34677	0.60008	1.22456	0.027144			-3.60672	1.06721	-5.75406	-2.41934	-0.993795	0.416136
0.29998	15.1784	7.4825	2.42102	0.805984	1.23692	-0.2367			-4.19088	0.626747	-6.6842	-2.6313	-1.60603	0
0.31007	13.9752	8.05041	2.09235	0.891232	1.20282	-0.194364			-4.40815	0	-8.08627	-0.685062	-2.53068	-0.657489
0.32016	13.2708	8.66632	1.93996	1.24384	1.73768	0			-5.26909	-0.469491	-9.10188	-3.3446	-2.62672	-0.494634
0.33026	15.0185	8.52392	1.52776	1.64446	2.50992	-0.131319			-5.41999	-1.48981	-11.0006	-4.34716	-3.60691	-0.626766
0.34035	13.5318	8.85229	1.18718	2.08415	1.27958	0.522459			-6.03066	-2.50265	-11.8532	-2.78952	-4.04178	-0.462893
0.35044	15.4129	9.78781	0.689909	2.64157	1.04502	0.188262			-6.25776	-3.48952	-12.7138	-2.1179	-5.07526	-0.653741
0.36053	13.9898	8.37581	0.40645	3.07293	0.519984	0.769185			-6.09294	-5.33825	-14.2176	-2.45178	-4.99256	-0.610795
0.37062	13.1769	8.85882	0.331859	3.26973	0.637767	0.973431			-5.02364	-6.40049	-15.0726	-1.35916	-5.64605	-0.984365
0.38071	12.518	9.42013	0.375166	3.97753	-0.360432	1.42484			-4.731	-8.64896	-16.1255	-0.111825	-6.18386	-0.725193
0.3908	10.7436	9.28103	0.4675	4.4429	-0.878976	1.78855			-4.53528	-10.4333	-17.15	-1.00182	-6.45957	-0.632468
0.40089	8.76744	9.24372	0.550605	4.36821	-1.53246	1.89538			-2.91558	-11.553	-18.3527	0.95677	-6.32981	-0.431162
0.41099	7.55608	7.29332	0.628155	4.48971	-2.28847	1.8862			-1.04171	-13.0818	-18.4427	1.17102	-6.08273	-0.307052
0.42108	6.73285	5.89135	0.688743	4.61175	-2.96304	2.38704			1.42361	-14.4532	-19.3312	0.155033	-6.14224	-0.134537
0.43117	7.21821	5.11955	0.712987	4.52827	-4.1656	2.5845			3.64859	-14.5613	-20.5822	3.34765	-6.36632	-0.717171
0.44126	6.62449	3.80806	0.676852	4.4703	-5.55356	3.10591			5.30008	-15.9282	-20.908	3.49876	-6.03911	-0.546242
0.45135	5.70126	2.83038	0.812988	4.49999	-6.1469	2.97783			6.88709	-16.538	-21.1518	2.80884	-5.72205	-1.02548
0.46144	3.21004	0.562826	0.780054	4.10554	-6.87281	3.30143			8.92392	-16.372	-21.3047	5.14302	-4.6926	-1.04981
0.47153	3.59315	0.176682	0.753753	3.58573	-6.90878	2.46875			9.05358	-18.5008	-20.7156	4.52492	-2.94416	0.658277
0.48162	2.48007	0.582527	0.675818	3.01448	-7.02303	2.86791			6.94764	-18.0004	-20.0155	6.60416	-1.31713	0.741846
0.49172	1.49287	0.205832	0.644215	2.35718	-7.34987	2.75417			4.29492	-16.3078	-19.622	7.20043	0.479424	2.63992
0.50181	0.00429	0.161447	0.581713	1.95605	-7.06813	2.7797			1.43906	-15.9449	-18.8888	5.52788	2.31364	6.08689
Max Current	80.1448	77.5488	75.0539	70.306	73.0495	70.7315		Max Current	104.256	98.245	102.202	101.32	102.985	99.9414	Average
Found	31.4276	33.8278	36.1345	40.5242	37.9877	40.1308		Unspiked	9.13557	14.6928	11.0341	11.8495	10.3103	13.1244	11.6911
Average	36.6721
RSD	0.0978763							Spiked Concentration		20
								Recovery	1.1146	0.956746	1.25502	1.43374	1.38387	1.35032	1.24905

## Sheet: Infected-Phytol-H
V	µA	µA	µA	µA	µA	µA
	SPE mod 1	SPE mod 2	SPE mod 3	SPE mod 4	SPE mod 5	SPE mod 6			Unspiked 1	Unspiked 2	Unspiked 3	Unspiked 4	Unspiked 5	Unspiked 6
-0.79995	0.406377	0.301069	0.136884	0.44802	3.13382	2.44105			-457.099	-360.331	-2.28383	-314.091	-202.441	-185.294
-0.78986	65.1673	5.85902	0.051425	0.12162	2.52009	1.91037			-16.1512	-37.9	-6.25963	-50.1444	-17.6608	-41.8901
-0.77977	52.473	22.784	1.05531	0.25239	1.47143	13.515			1.69358	-0.9515	-8.40069	-21.2019	-2.61226	-18.3785
-0.76968	77.6522	29.7425	4.98135	0.97003	4.20655	20.1083			-3.43767	7.25167	-4.402	-12.5573	-6.77691	-9.07678
-0.75959	82.5797	42.2211	6.04483	1.1903	6.7332	21.2596			-6.78902	7.00609	2.37624	-13.3537	-14.4614	-6.28959
-0.7495	95.8981	38.3882	6.13825	0.65008	7.45719	20.829			-2.89332	5.13045	-1.76691	-2.89925	-13.1744	-1.75865
-0.73941	68.3605	42.5181	7.93065	4.20252	6.47396	19.4968			-2.97027	7.15053	2.46915	-2.50126	-21.1704	0.693972
-0.72932	46.2747	37.5773	15.0991	11.9265	6.10095	17.9323			-0.472976	7.00422	5.3246	-3.84685	-11.8685	0.453796
-0.71923	42.7747	38.8691	15.1622	13.714	6.53399	17.0028			0.270312	5.11508	1.2939	-13.5427	-5.63446	0.716456
-0.70913	30.1327	38.0062	14.5177	14.01	6.37467	15.5833			6.06617	3.02236	-8.45726	-2.89774	0.0005	3.6565
-0.69904	7.21819	37.464	12.8098	13.6535	7.03628	14.5326			3.02781	2.55773	-4.44679	-2.46187	-8.62672	4.97108
-0.68895	0.026303	39.4835	12.6165	13.5372	7.69508	13.4042			6.22115	-0.876645	0.0356701	-3.12983	-14.622	6.20041
-0.67886	3.28706	38.0018	12.5093	14.0302	8.28596	12.8379			15.9588	-6.47892	-3.87283	-1.93252	-17.0085	8.06351
-0.66877	4.62219	37.2888	11.3747	13.9847	8.5241	12.322			19.0066	-12.0821	2.01249	-0.312265	-17.2554	13.1992
-0.65868	1.86136	36.6721	11.3316	14.7219	10.4122	11.5541			19.4225	0.0613655	4.20764	1.53206	-13.121	11.922
-0.64859	9.54866	27.9868	11.4919	14.6706	11.278	13.0958			23.6269	2.55609	1.2906	2.51637	-8.63547	9.60728
-0.6385	9.06537	24.5279	11.0617	14.8648	13.3803	12.8131			25.2928	8.44382	0.757136	3.91898	-6.10784	5.29147
-0.6284	10.4865	20.6512	9.39667	15.0534	13.5197	14.0066			26.8859	7.02068	-0.356093	3.34966	1.52454	3.71605
-0.61831	10.1128	20.8757	9.202	14.589	15.119	13.991			27.9256	6.18153	1.03004	3.95205	0.88335	5.48888
-0.60822	7.41107	18.3662	9.98468	14.9567	14.7313	19.3677			25.9423	-0.119035	3.39206	3.80387	6.86785	3.74857
-0.59813	1.97719	22.6896	9.59218	14.6629	15.3557	22.0839			28.7172	-6.16864	3.55618	4.7068	10.0173	3.0186
-0.58804	4.3694	28.7121	8.77362	14.4384	15.3514	19.707			29.3171	-9.83749	2.92656	3.55237	1.78703	3.94344
-0.57795	7.75387	30.209	8.78698	14.6422	13.955	23.6607			29.4031	-8.75007	2.8442	4.35951	1.30368	1.27098
-0.56786	7.4436	25.7832	9.17827	15.2403	14.1596	27.4938			31.1721	-4.17004	3.02191	3.72232	7.6166	2.09909
-0.55777	9.32878	20.4316	7.9646	14.8819	13.9326	24.7686			31.1949	-2.23031	3.09554	3.44959	10.522	1.45294
-0.54768	11.2657	19.0647	8.66124	15.2022	14.1751	23.3296			30.6088	6.55123	0.91008	2.38066	7.565	-0.1371
-0.53758	11.906	19.7245	8.26312	15.6904	14.4235	26.3232			28.9575	11.4354	6.27047	2.42702	2.80636	1.00549
-0.52749	14.2174	23.2004	7.1	14.54	14.6207	26.5918			28.9203	13.291	12.8518	3.03743	-2.32616	0.316656
-0.5174	11.1482	19.8394	7.13396	14.8998	14.9277	28.4178			27.658	13.9989	35.3014	1.13089	-9.17843	0.996408
-0.50731	7.1139	18.4477	7.10076	14.6514	15.2878	29.2351			26.3582	15.4252	21.7039	0.209181	-8.47282	0.929616
-0.49722	10.3714	21.2936	6.46552	14.1398	15.498	26.8146			24.6037	19.7764	22.1112	0.378043	-10.4985	1.16669
-0.48713	9.24868	22.0738	6.416	14.04	16.1494	30.6913			24.234	22.0632	22.5256	-0.932064	-14.5184	3.52128
-0.47704	10.5146	23.2099	6.93554	14.4298	16.4676	29.8258			23.8788	25.9144	15.6823	-2.60466	-17.003	3.98061
-0.46695	12.9463	23.5092	7.42488	14.9089	17.3842	28.3966			23.0346	27.3126	43.1715	-3.16345	-17.7241	7.35643
-0.45686	15.7661	26.9528	6.81597	14.0255	17.9155	27.2681			21.6414	28.5898	13.9091	-2.89785	-17.9803	10.8958
-0.44676	15.369	26.6809	6.7637	13.0766	18.2071	25.6896			21.6147	32.382	24.5446	-2.48862	-13.9562	13.0083
-0.43667	14.7264	25.0617	7.34436	13.0532	19.1402	26.5962			18.3821	31.0114	24.0498	-1.43185	-11.612	15.1983
-0.42658	9.32544	19.266	7.78745	12.5628	19.5549	30.7167			15.9621	36.4392	25.8122	0.750111	-11.9946	18.7812
-0.41649	9.31767	21.4281	8.08109	12.2485	20.3242	36.0982			15.1551	41.6887	29.2679	2.94367	-10.3273	20.6623
-0.4064	12.8941	24.9531	8.27435	11.7487	21.0405	40.8317			13.5981	44.3903	32.5729	4.86412	-8.00155	22.82
-0.39631	15.3816	26.5676	8.78091	12.0738	22.8364	43.2191			12.107	47.8685	37.4763	7.99489	-3.07233	28.4366
-0.38622	18.3816	29.5393	11.5868	15.2548	25.6184	40.1109			11.4825	54.0936	42.1149	12.5458	-2.53139	30.5037
-0.37612	20.0602	30.9893	14.0716	19.6737	26.1837	40.9138			11.5026	57.0711	45.4028	16.1711	-0.01706	33.2162
-0.36603	20.2576	27.0566	17.767	24.3099	29.1761	39.4749			10.5699	62.7643	50.2662	22.0995	2.28068	36.5655
-0.35594	18.3529	26.3774	22.293	27.5089	32.2659	42.2003			11.6432	65.5048	53.5148	26.4586	5.24217	40.01
-0.34585	23.987	15.449	27.1766	27.4175	35.3313	43.9797			12.8631	68.2759	56.717	31.3689	6.06487	41.9475
-0.33576	26.9174	23.134	31.6067	27.8359	38.0578	43.0531			14.5117	70.7477	62.1692	36.511	6.32326	49.4854
-0.32567	30.0762	19.5677	35.0915	30.3099	41.9506	41.8482			18.2302	72.5254	65.6057	43.1262	10.4109	54.2863
-0.31558	31.3788	22.1124	38.1058	33.0277	45.3307	40.9995			20.0215	76.6291	65.6125	49.3966	13.0117	56.6898
-0.30549	33.4336	24.8123	41.0899	35.9056	46.7024	39.9832			29.186	81.6784	67.5649	54.9481	20.0642	60.1801
-0.2954	34.4774	28.1928	43.9666	38.553	46.0421	38.338			39.8371	85.345	68.9745	60.0563	23.9867	64.7739
-0.2853	37.2366	30.5653	46.1933	41.3076	47.0129	42.4891			54.5855	88.2998	69.5006	65.2376	26.0964	66.8677
-0.27521	39.4236	48.2657	48.8676	44.5346	49.8312	40.7355			70.1814	91.1665	71.5182	67.2721	33.3043	70.2396
-0.26512	46.0984	53.9026	52.1736	48.5232	52.6643	43.0889			79.6751	92.2697	79.3977	70.5465	39.6371	71.9316
-0.25503	51.673	61.3823	56.263	53.9379	56.3206	46.2055			84.6143	94.2656	91.0919	77.7008	45.7208	77.3535
-0.24494	60.0604	55.9942	60.3794	59.0253	57.926	47.2809			90.2674	93.4591	89.6711	85.2706	57.9813	87.3625
-0.23485	52.5058	49.5461	62.3074	61.6163	56.8161	51.6584			88.8715	91.8582	92.3858	90.2005	78.8742	90.945
-0.22476	43.7779	47.3239	60.9894	60.0393	53.6977	58.7474			84.3485	92.4209	93.3531	93.2918	88.608	85.4657
-0.21467	39.228	45.4034	55.7895	54.9148	48.5728	53.2778			79.5923	92.138	91.2842	91.5474	73.2062	66.7495
-0.20458	38.2288	40.9003	49.7912	48.5087	44.5651	45.4941			76.9296	86.3549	88.471	85.7357	64.8188	53.8445
-0.19448	36.7001	43.7454	43.7364	43.2146	40.4356	36.7147			75.7791	81.0327	85.4392	77.9745	60.6468	46.0886
-0.18439	30.9071	47.2095	37.9626	39.005	37.0917	32.1665			73.9522	78.4266	83.8966	71.8383	58.9618	38.8741
-0.1743	26.797	44.0922	32.1208	34.8037	34.404	29.635			76.134	75.9419	81.9288	63.7987	54.7124	33.1671
-0.16421	13.8631	39.058	27.4264	32.3574	32.2961	27.3297			76.6295	75.8949	78.5234	54.929	50.1441	28.0365
-0.15412	12.9159	33.4774	24.2393	28.8694	29.4688	25.4468			79.1352	72.9826	74.5694	47.3278	43.5253	23.1001
-0.14403	19.01	36.4197	20.8969	27.3326	26.4952	25.9219			75.3579	67.8453	70.3071	40.5079	37.8276	18.0282
-0.13394	21.8755	33.5333	18.6617	26.2545	24.2488	23.4476			68.8777	62.7579	66.1177	34.7481	36.0635	13.4169
-0.12385	20.2735	34.3009	16.3041	25.5882	21.7892	21.0445			57.5433	59.7447	61.6876	29.8973	30.1561	11.2405
-0.11376	19.536	36.3265	15.1122	25.2472	20.155	18.78			49.6387	57.0195	57.2947	24.7289	27.4753	7.37465
-0.10366	20.4579	34.5618	12.7632	24.0768	17.4326	14.5336			41.1366	53.9547	52.7965	19.3991	23.5619	6.43668
-0.09357	19.7562	38.0919	10.7636	23.2167	16.3476	14.0359			31.9799	49.6647	48.6403	15.5195	19.8832	5.76128
-0.08348	21.9057	37.3496	8.725	21.7926	13.7257	13.1894			23.6989	46.3982	44.132	10.9054	13.7311	3.74763
-0.07339	22.1288	37.3557	7.02981	21.1095	11.381	11.8815			20.4899	41.5246	39.4996	7.89996	9.85938	3.1982
-0.0633	21.8983	37.149	5.37646	19.3616	8.06847	12.4093			15.3789	37.9466	35.6894	4.29037	7.58597	2.59735
-0.05321	20.2206	38.0591	3.29832	17.828	4.49119	12.3264			10.4645	35.3621	31.5367	2.60372	5.45411	1.3083
-0.04312	17.894	23.8862	2.27418	16.5197	3.05884	18.5816			7.56504	31.7086	29.0193	-0.252365	3.86746	1.97778
-0.03303	14.8553	22.3336	2.22279	16.3117	3.10859	17.8961			5.32487	28.3423	26.5851	-1.27744	0.0051164	1.99316
-0.02293	17.8306	24.1976	2.13002	15.6201	0.0208444	14.8145			1.56489	25.2213	21.8181	-1.81798	-2.18829	-0.391764
-0.01284	18.9181	20.2726	2.21606	15.4031	0.0167034	8.8905			-1.07574	21.6922	20.0743	-1.36337	-4.26302	-0.038568
-0.00275	27.1639	23.9427	2.25865	14.5489	0.0178268	10.5462			-3.3383	19.75	16.9716	-1.1862	-2.23169	1.40099
0.00734	27.7347	26.1732	2.03623	14.0338	0.0186386	12.3563			-4.48111	18.3176	16.0325	0.126566	-5.01576	2.85373
0.01743	29.0978	27.52	2.62205	13.7	0.0129478	11.8257			-6.62483	14.4672	14.5025	-0.467543	-4.62062	2.19985
0.02752	32.621	28.3083	3.33175	13.3432	0.0161048	11.1119			-8.4494	10.9636	13.4709	1.20265	-2.90441	3.454
0.03761	32.8564	24.1073	3.63191	13.4976	0.0143418	10.2179			-6.58725	10.8385	12.0564	0.402591	-4.38683	3.04308
0.0477	34.0128	20.0235	4.12821	13.0119	0.815843	11.2056			-6.42855	11.0808	13.2235	1.31211	-4.34734	3.45001
0.05779	28.2418	21.3399	5.40993	12.6402	1.42313	10.3514			-5.91718	11.0252	13.4035	1.8129	-3.11484	6.42535
0.06789	29.4384	17.0701	5.62507	12.2929	0.014186	10.3753			-4.76316	9.00652	13.2437	2.27166	-1.83191	4.78262
0.07798	30.9063	17.6234	5.41714	11.4292	0.0010496	8.5781			-4.05059	7.99995	12.4334	2.72334	-0.10722	8.59082
0.08807	29.2324	11.3996	5.00257	10.9976	0.010865	8.96522			-2.69878	8.66754	9.74354	3.43033	0.75828	5.7077
0.09816	31.848	14.5198	4.7738	9.95889	0.008446	9.41765			0.346724	9.35722	8.03612	4.119	0.62878	5.71434
0.10825	38.0896	13.9356	4.44884	9.00447	0.0151782	6.78448			2.44714	9.69888	5.99539	5.10049	0.86898	8.30917
0.11834	38.7085	15.813	4.32721	8.02706	0.0189666	9.37542			2.79269	12.7233	5.58238	5.71721	3.1375	7.82972
0.12843	38.3626	15.8427	3.94058	7.59603	0.0212134	8.77128			5.9288	15.4077	3.92571	6.69125	2.50292	7.38396
0.13852	35.5815	15.7577	4.23217	7.04818	0.0222466	7.52393			8.36648	16.7881	3.83545	7.39556	4.87934	8.71236
0.14862	36.2552	16.2275	5.13506	7.071	0.0203606	6.96093			10.6713	18.1901	1.97437	8.58633	4.98936	10.1685
0.15871	35.9341	15.8115	4.55549	5.66815	0.0261744	6.38804			12.2948	19.2818	1.55685	8.35893	4.66713	10.1411
0.1688	27.1992	14.8558	6.1567	5.88528	0.0231076	8.31981			15.6376	21.7363	1.10158	8.27348	5.69433	10.5124
0.17889	30.894	14.5956	5.79437	5.13131	0.0209018	9.80181			21.2326	24.8855	4.29871	8.3231	5.20054	11.5921
0.18898	30.0815	14.5239	6.37253	4.32383	0.0211232	9.23535			24.5714	26.0888	5.32985	9.12398	7.23043	12.1428
0.19907	30.8149	15.7729	6.91045	1.67823	0.000624625	11.4464			26.9806	26.3544	6.01111	8.77021	7.21296	11.4822
0.20916	32.1839	14.0742	7.30188	2.09623	1.49018	13.0452			30.074	26.6436	7.32397	8.28282	7.39394	13.1913
0.21925	32.675	13.6457	8.29267	2.91892	2.27028	13.0305			30.9291	25.6817	9.01351	8.65202	8.62481	12.7834
0.22934	35.5195	15.1344	8.4069	3.03396	5.56347	11.2777			32.2362	24.4522	10.8715	8.27338	7.75591	13.811
0.23944	35.0791	16.4824	9.00098	3.46876	7.92401	8.35695			34.006	23.5985	15.0217	8.56576	6.34013	15.208
0.24953	34.0866	16.9815	8.9515	3.82376	10.5177	2.61524			32.5174	21.8328	12.5157	7.55914	4.88407	14.6265
0.25962	28.5657	16.7424	7.91684	3.04834	13.113	1.49451			34.9602	19.1295	12.5745	7.78949	6.13919	13.6327
0.26971	30.5668	15.7445	8.50597	3.66593	14.544	1.14236			31.2629	18.4859	9.58953	7.78786	5.02266	14.5431
0.2798	29.7388	15.8602	8.5505	3.73854	16.908	4.63759			28.6201	17.5657	8.37941	7.12722	4.96662	14.2859
0.28989	29.6585	14.7977	8.7157	3.94389	19.8097	5.12866			27.0283	15.3611	7.38855	7.31014	4.06499	16.9539
0.29998	24.1074	15.1328	9.83692	4.73066	20.2667	0.0208722			24.9002	13.8598	4.23768	5.89628	3.42579	19.0063
0.31007	25.2076	13.9584	10.2416	5.18229	21.1944	0.023951			23.3403	12.688	4.04685	5.18481	3.77238	17.9533
0.32016	22.3259	14.6003	11.3515	6.01655	21.9111	0.0285778			18.6256	11.8686	2.38817	4.85567	3.43923	17.3003
0.33026	18.983	13.1098	12.7567	6.79026	21.6567	0.0282682			17.6749	11.7152	2.60941	3.4708	3.16665	17.2444
0.34035	21.3828	13.6464	13.4347	8.00132	21.1335	0.0307966			13.5986	10.8824	2.22302	2.67649	2.81342	6.07121
0.35044	29.1009	11.9779	14.0479	8.741	18.9057	0.0354492			9.60243	11.6808	2.81098	1.32933	2.6746	5.77608
0.36053	32.0981	12.3419	15.4919	9.83184	18.1794	0.0334196			4.64215	9.11687	3.19697	-0.948622	2.40317	5.04
0.37062	30.6592	10.5294	15.8078	10.0078	16.4337	0.033239			1.90246	6.5114	3.85267	-2.21406	1.79747	3.99119
0.38071	28.8994	10.778	15.7011	10.24	15.588	0.0335572			-2.2904	6.17638	5.44586	-3.83122	1.43098	3.68568
0.3908	28.5323	8.82829	15.2561	9.97122	13.8647	0.028896			-4.476	4.45525	2.70184	-5.37944	1.33063	3.78726
0.40089	25.7874	9.2177	15.1568	9.75696	13.1889	0.0290508			-5.9596	2.6487	1.20281	-6.68993	1.19334	2.91992
0.41099	16.7856	8.60481	14.2209	8.87843	10.6008	0.0291454			-8.03981	1.08934	1.8928	-8.40335	1.10102	1.3578
0.42108	18.7409	8.89449	12.4048	7.5486	8.51326	0.025284			-8.53423	2.08663	1.80835	-10.1502	0.77074	1.5793
0.43117	16.5814	4.95511	11.4011	6.6694	6.92265	0.0257226			-7.94839	-1.31793	3.20112	-11.4491	1.24604	2.89132
0.44126	14.9177	5.78373	9.79053	5.30243	6.11318	0.0127108			-7.27776	-2.72958	-0.371135	-12.9607	-0.06587	1.6753
0.45135	10.9474	5.70002	6.80123	3.85435	1.2542	0.014147			-4.35103	-4.09811	1.47213	-12.6282	0.316399	2.05832
0.46144	16.973	20.2408	5.77355	2.88061	0.54193	0.019952			-7.35991	-5.76286	0.116248	-13.6817	0.360775	0.57414
0.47153	22.982	15.9077	4.82099	2.34883	1.32126	0.869744			-4.30021	-6.68024	0.060751	-14.3521	0.612234	1.59368
0.48162	21.0322	15.2894	2.8162	1.5592	0.000119211	4.26859			-4.4263	-9.03691	0.202477	-14.6086	0.528304	0.497796
0.49172	9.13361	9.20064	1.46922	1.2813	1.69584	6.67891			-4.49327	-10.5774	1.83019	-14.184	0.57136	0.745424
0.50181	0	1.07755	0.007854	0	2.52113	9.07733			-7.11662	-9.249	1.77375	-13.1608	0.464987	0.628248
Max Current	60.0604	61.3823	62.3074	61.6163	57.926	58.7474		Max Current	90.2674	94.2656	93.3531	93.2918	88.608	90.945	Average
Found	21.2595	20.5228	20.0073	20.3924	22.4491	21.9913		Unspiked	4.4246	2.19632	2.70485	2.739	5.34939	4.04696	3.57686
Average	21.1037
RSD	0.0457837							Spiked Concentration		20
								Recovery	0.841746	0.916325	0.865122	0.88267	0.854986	0.897218	0.876344

## Sheet: Infected-Phytol-L
V	µA	µA	µA	µA	µA	µA
	SPE mod 1	SPE mod 2	SPE mod 3	SPE mod 4	SPE mod 5	SPE mod 6			Unspiked 1	Unspiked 2	Unspiked 3	Unspiked 4	Unspiked 5	Unspiked 6
-0.79995	4.17034	2.43135	10.7176	17.2874	10.2617	9.61695			-815.938	-216.43	-758.675	-494.432	-367.893	-3.40909
-0.78986	9.38987	5.02621	10.843	9.7267	8.13926	6.16052			-53.966	-48.851	-169.866	-17.4425	-38.9518	-5.7996
-0.77977	4.98901	5.56697	7.70141	18.7507	5.64298	7.99659			-2.60806	-21.4323	-54.3932	-5.06972	-0.363658	-7.41862
-0.76968	8.62572	4.02986	5.85804	19.8914	12.5654	11.4004			1.15539	-11.067	-21.5792	-8.76439	3.30758	-3.796
-0.75959	8.46826	3.15081	2.57084	12.296	12.6208	14.0306			-0.552839	-7.35265	-10.0719	-10.4278	-1.51453	0.0300477
-0.7495	9.98795	10.0261	5.17947	14.7228	10.6566	13.873			0.335685	-2.0453	-2.32886	-10.0921	-6.60392	-3.45476
-0.73941	9.96432	9.77089	5.36865	7.55096	7.52587	14.2253			1.08425	0.812333	2.07585	-9.8184	3.26037	1.77647
-0.72932	8.42604	9.00162	1.47124	7.39863	9.61942	11.9101			1.83485	0.543376	0.899238	-9.39086	2.22101	3.69441
-0.71923	7.09924	2.95839	2.01859	4.59499	7.73147	12.3571			2.32524	0.834806	-1.23786	-6.54081	-1.93646	1.13931
-0.70913	3.48775	6.49184	5.82722	8.54107	6.35851	10.5868			3.91738	1.9733	0.285911	-9.39109	-7.44018	1.67095
-0.69904	4.6529	6.3704	4.09383	6.04246	6.95508	6.3055			1.2454	1.59057	-1.06621	-6.44131	-12.3287	2.3633
-0.68895	1.83045	10.0743	6.88228	10.2228	5.49702	4.70296			2.5813	2.02198	-1.02718	-2.85216	0.0029781	4.53442
-0.67886	2.86078	10.0524	3.91949	8.60323	6.63422	3.04103			6.73434	1.58617	0.0230648	1.29971	-7.43705	2.77269
-0.66877	1.88032	10.7366	5.79319	6.97576	6.57166	3.53279			9.0121	5.39108	-1.5042	2.24743	-12.2757	9.41803
-0.65868	2.52717	16.9183	7.63882	9.09567	4.45455	4.41636			5.02651	3.85826	-4.73519	4.20307	0.250009	11.391
-0.64859	3.6329	19.0179	5.13231	9.43851	3.44416	1.17006			6.74613	3.98284	-2.83967	3.89017	2.19756	6.66675
-0.6385	3.0205	14.9819	9.07541	9.66681	5.4547	4.44013			8.4212	1.47097	-2.06955	5.77017	-2.15051	3.29566
-0.6284	3.07841	11.6525	4.76516	11.4149	6.48682	5.64766			9.44349	0.0024192	-3.71627	5.60199	2.52233	2.18783
-0.61831	1.816	11.3236	3.9423	7.85423	2.954	5.02732			9.69243	2.27115	-4.98493	-1.98267	-1.72292	1.62287
-0.60822	4.41908	9.08656	5.52783	11.7183	5.1471	2.77139			10.6773	0.243516	-2.80048	1.23341	-6.5212	3.03493
-0.59813	4.31358	16.1757	5.28816	7.27502	3.16605	6.29416			11.9713	-1.13432	-4.46125	2.34484	-5.01969	3.66227
-0.58804	4.67961	8.56631	2.48942	6.45903	7.65049	3.91257			13.2453	0.511531	-2.95874	4.08412	-8.94181	2.7984
-0.57795	3.69893	10.7723	5.49956	10.9849	4.47284	3.18892			12.5639	-1.42065	-0.319662	3.25905	-9.41397	1.20209
-0.56786	6.91456	14.0367	2.29905	9.36901	3.59445	6.30591			14.9994	2.23199	0.606021	4.97983	-11.2317	0.154358
-0.55777	5.68062	6.42395	2.27463	8.89815	4.19744	6.42026			16.0203	2.85891	-0.417358	5.389	-11.2393	-1.07555
-0.54768	7.74094	0.962505	3.71144	13.9012	5.9508	9.74382			16.6025	1.60034	-3.10869	5.62285	-3.84302	-2.44989
-0.53758	7.92497	8.21992	5.92335	14.9534	10.7459	9.61006			14.4946	3.68374	0.692171	5.71392	-0.768982	-0.793245
-0.52749	10.2364	3.65373	5.29161	11.3834	8.21473	11.1341			15.3925	4.06395	-1.20273	6.02882	0.395734	4.77825
-0.5174	10.0507	8.06798	3.99291	9.78172	9.0665	14.0034			14.3563	4.87014	3.0315	5.66203	2.00704	-1.83016
-0.50731	12.7281	7.60473	8.02062	12.2426	10.98	15.4755			13.4176	5.25034	3.38999	4.9557	2.57544	-3.35411
-0.49722	13.6796	2.71933	8.18489	16.6231	11.0139	16.1969			13.227	6.14291	1.99604	4.91214	6.82422	-2.26263
-0.48713	14.7249	1.75248	12.0264	17.8982	15.3165	17.6194			12.085	10.2162	5.70343	4.51562	8.65312	3.1627
-0.47704	14.2448	2.48807	11.4465	16.628	13.1427	19.3887			12.4485	11.6724	5.92714	3.9338	11.209	-3.42994
-0.46695	19.7931	0.00306	13.604	21.1571	12.1595	22.3387			10.2695	13.8789	7.36392	2.99393	13.6022	-3.76201
-0.45686	17.731	2.00583	16.033	25.127	13.5483	24.1185			8.8874	16.9353	10.2517	2.45991	17.0216	-2.06086
-0.44676	21.2061	6.82519	17.6674	21.4914	17.1201	26.7829			8.97112	19.8276	14.1527	1.12415	21.1618	9.09832
-0.43667	22.5489	11.0131	23.2645	26.4111	16.682	31.2267			6.27614	22.3094	14.035	0.142649	21.7423	8.30836
-0.42658	24.4738	9.86794	28.5259	30.6867	16.7628	33.5045			3.73166	27.3695	16.191	-0.922611	24.9264	10.4985
-0.41649	29.18	13.1605	29.7645	36.6106	17.282	37.4218			2.01908	30.533	19.3652	-2.33375	28.7871	13.6403
-0.4064	28.3811	9.33066	30.2919	39.2451	16.5229	40.9268			1.89116	32.8401	19.1337	-2.8548	32.0291	18.115
-0.39631	30.4283	13.6342	32.4959	40.6607	18.0457	44.0227			-1.01532	39.1527	24.5829	-3.59378	36.0152	21.8939
-0.38622	34.7717	17.0615	36.9279	37.4333	21.1762	45.4522			-1.65453	41.9863	26.8541	-4.62452	41.3924	26.4978
-0.37612	37.7386	21.9633	38.9763	42.5474	25.051	46.5389			-0.204355	44.9193	33.2086	-4.422	44.9366	30.3091
-0.36603	42.5417	24.3005	36.6158	48.558	29.3808	52.3753			-1.68744	49.2556	35.0414	-4.10869	49.5351	34.6098
-0.35594	43.3021	21.6782	40.426	48.8633	34.9921	57.0212			-1.47417	52.5227	40.152	-5.74446	54.0598	39.2025
-0.34585	46.5059	31.5098	41.6237	49.122	40.9338	58.1975			-1.16213	54.1619	44.1954	-4.86631	58.1488	42.8413
-0.33576	48.9352	33.7483	41.0464	52.2829	47.8668	61.4434			0.569744	61.1413	48.5169	-3.22362	62.5706	50.2626
-0.32567	53.6394	37.1858	46.2137	53.8746	49.3976	64.5932			1.06606	64.2386	53.0445	-2.14864	67.4802	54.6703
-0.31558	55.8435	41.4804	48.6032	57.9341	54.9285	68.3795			1.8199	65.0946	58.7279	0.969553	72.4781	57.3191
-0.30549	59.7869	47.8975	54.7965	60.9084	59.011	68.7446			3.53158	67.2485	63.9894	4.62174	77.0563	60.2845
-0.2954	66.4713	48.8029	59.2074	58.6608	62.6018	72.195			6.40398	70.5918	69.3739	13.9663	81.3848	63.7629
-0.2853	70.7436	54.7162	57.7191	64.203	66.9076	76.5054			8.06685	72.1254	74.585	27.494	83.5625	65.232
-0.27521	74.8029	58.7866	60.0388	68.3744	73.831	78.6747			12.41	73.8541	82.2922	46.0232	86.8553	70.4585
-0.26512	75.7925	62.8162	68.5129	70.63	79.2193	79.582			20.9013	75.1312	84.0619	64.9128	89.1427	78.2062
-0.25503	76.607	74.3384	71.4439	75.7988	83.6372	83.1954			35.7448	79.6041	89.1232	78.1003	90.4783	89.9229
-0.24494	77.8084	79.7623	73.5478	79.2373	81.7809	83.1299			68.5489	89.209	90.8785	87.8425	91.2221	89.6352
-0.23485	81.319	81.7789	78.735	83.4618	80.1542	83.2809			89.8845	92.6951	90.1786	91.2009	91.0779	92.1927
-0.22476	78.6024	84.5277	81.4063	84.223	79.348	80.3729			88.6598	88.344	91.1056	92.3282	92.3398	91.8047
-0.21467	69.3319	82.8874	82.3779	83.8892	75.5086	76.5928			83.0228	68.1426	89.1748	90.8746	91.8354	88.6775
-0.20458	63.4047	79.1579	80.6514	76.5582	71.0353	74.5046			76.5276	54.2775	89.2035	88.9739	86.7862	85.0214
-0.19448	62.5206	73.1503	78.6663	68.2167	66.0986	69.7902			76.9165	46.8791	86.0459	85.5182	82.6178	80.7057
-0.18439	60.3254	70.9818	76.6481	65.7482	62.1831	67.7653			77.3316	40.4197	83.1611	84.4719	80.1771	77.8421
-0.1743	53.8523	72.0161	69.7374	63.839	58.4758	64.3388			79.7547	34.999	81.4149	82.7066	77.6837	75.1676
-0.16421	51.2103	64.8896	64.6522	60.4445	52.2241	59.5405			82.7639	30.5935	79.9359	76.3685	77.9832	70.9545
-0.15412	50.2375	63.2176	57.3516	61.658	46.5703	54.5614			83.5706	25.9679	80.46	64.8199	74.5155	66.5878
-0.14403	47.0991	63.8641	46.9827	55.3496	41.0069	51.7156			78.0554	20.4972	71.0352	52.2552	69.8843	62.4953
-0.13394	44.3015	59.3615	40.8799	52.0608	37.4539	43.1822			64.9223	15.3674	59.3601	42.0568	64.7764	58.6031
-0.12385	38.8029	59.95	32.8281	48.5541	31.3926	42.363			52.5638	13.0418	48.869	33.7147	61.5088	54.514
-0.11376	35.7758	55.9453	29.1616	44.9127	26.663	34.7833			42.4591	8.68122	34.5067	24.8632	58.4364	50.4862
-0.10366	34.4989	50.4268	23.5505	39.8083	21.1669	32.5806			35.8023	7.67766	15.2089	20.2222	55.0883	46.6126
-0.09357	30.8564	50.8509	16.2365	38.6636	17.4282	27.181			25.9406	6.99866	3.44322	15.3211	50.4255	42.5546
-0.08348	28.3806	50.5687	13.746	32.3765	16.0146	22.6596			15.2443	4.37157	3.61163	11.1033	47.6176	38.8649
-0.07339	25.4674	44.5428	13.1735	32.9325	11.8754	21.8369			12.9858	2.88936	0.007095	7.28159	42.4643	35.5209
-0.0633	25.0207	49.9632	11.559	27.9557	8.68323	16.5129			9.0724	1.64071	-5.48302	5.35423	38.6568	32.1442
-0.05321	22.6304	49.9732	8.73902	25.4885	7.2882	18.58			8.61633	0.0149246	-9.69472	1.15468	36.0081	28.6161
-0.04312	21.4312	48.3091	7.95769	18.5413	3.05838	9.95468			6.71639	0.421189	-6.94831	-1.17903	32.2934	25.1677
-0.03303	16.8764	49.915	4.38106	21.1746	2.76247	10.4649			3.96513	-0.165943	-4.00308	-3.60534	28.8534	22.0992
-0.02293	15.1474	47.1468	3.94087	16.1098	2.76497	7.8465			2.72581	-3.00793	-2.46145	-4.82914	25.6901	19.0093
-0.01284	12.2032	48.0621	5.93007	14.4706	3.57471	4.75728			0.716664	-3.17164	2.47173	-7.14475	22.0966	16.1147
-0.00275	11.9197	47.563	3.68628	14.443	2.58879	5.03945			-1.15322	-2.17982	0.980895	-9.1078	20.0975	13.8679
0.00734	12.5452	45.8341	0.973026	9.16433	3.25953	2.72483			0.461234	-1.58502	5.22551	-8.71794	18.6538	12.6443
0.01743	10.8256	43.3908	5.95223	16.1012	4.20104	3.65104			-0.10273	-2.8915	7.44257	-9.10936	14.7238	10.9108
0.02752	7.95851	43.0764	5.83492	16.8213	3.80899	1.82441			0.00674797	-1.92049	8.12154	-9.59908	10.6453	9.50943
0.03761	8.75651	40.4345	5.35808	21.1087	4.25921	3.61816			0.444464	-3.07336	11.0339	-10.2824	10.2227	8.74346
0.0477	6.71482	45.5364	8.22089	19.8655	5.12389	4.67174			-0.215314	-2.13909	12.5635	-9.60982	8.51584	8.29989
0.05779	6.94208	44.1194	6.01194	21.3326	2.28293	3.98308			-1.31956	1.1964	10.7747	-9.48343	7.16744	8.95499
0.06789	6.20636	45.8225	4.0655	18.3661	3.22749	3.36272			-0.470442	-1.17904	11.8723	-8.07471	4.93157	8.01106
0.07798	6.98794	40.1763	8.603	17.8618	2.96954	6.71841			0.417392	2.46736	10.4476	-5.67515	3.14509	7.65801
0.08807	5.64833	41.7517	9.06237	18.205	5.08891	2.66162			0.74474	-0.158634	6.99995	-6.18999	2.97829	4.74799
0.09816	5.31799	44.638	5.91856	21.0545	5.92944	5.74208			1.93601	-0.54313	10.6178	-4.16444	2.35482	3.07517
0.10825	4.98312	41.798	8.86468	19.9517	5.71221	4.32947			2.84101	2.28526	8.56603	-3.13463	1.50297	1.57822
0.11834	5.53482	43.6403	10.0297	25.4021	7.38602	8.16711			1.5726	2.52617	7.31703	-1.3539	2.21645	0.10945
0.12843	6.37242	45.9026	10.0083	22.2432	6.75583	11.253			3.5189	2.60025	8.54726	-0.557453	1.8052	-0.50917
0.13852	6.75595	44.1832	9.96063	18.2875	5.14562	12.6275			4.7472	4.8153	8.18294	1.48262	2.01214	-1.53154
0.14862	2.3228	44.4517	9.98179	19.9627	5.25612	10.6837			6.02764	6.16209	8.47872	6.28471	2.07546	-1.30995
0.15871	6.14893	48.0792	11.5198	21.7591	7.97735	8.92974			5.05581	5.31775	8.69258	8.0462	2.30597	-0.486529
0.1688	5.46011	41.5368	11.0851	21.023	8.38023	12.762			6.03065	7.123	8.84304	10.1059	2.93329	-0.680092
0.17889	10.5319	43.4308	10.741	20.2039	7.67963	7.86423			8.33541	8.87678	9.07076	12.0126	4.16356	0.541099
0.18898	10.322	46.3775	14.4351	20.5782	7.06942	7.00484			10.0881	10.201	10.7724	8.43076	3.99731	1.54456
0.19907	11.9552	45.5623	15.7839	20.7494	8.71365	10.4128			8.52808	9.37528	8.77176	9.12905	4.48871	2.92308
0.20916	11.7169	45.218	15.848	21.9084	9.97908	8.68099			9.28723	11.77	12.2257	9.79718	4.356	4.45559
0.21925	12.8452	43.3255	17.2229	24.7768	6.88525	12.325			10.8777	10.8125	11.5082	9.16905	4.85092	6.43809
0.22934	13.6363	42.1205	14.1713	23.4639	8.46184	11.0097			11.4501	11.4496	10.0532	7.43327	5.19515	8.58254
0.23944	12.7976	41.8746	16.2148	21.3363	8.77619	10.8019			11.0491	12.5779	12.0622	5.28765	5.71274	11.4445
0.24953	14.2098	46.1874	15.7733	23.202	9.12388	10.3459			12.3803	11.3132	10.7884	8.4689	6.58513	9.5851
0.25962	15.4634	46.0618	13.5627	21.9386	9.67187	8.5071			11.136	9.87638	11.6591	8.66045	5.7703	7.82373
0.26971	15.5091	43.4858	18.2676	21.4648	12.3223	8.02587			10.2965	11.3678	7.35407	7.07567	5.72877	6.36713
0.2798	13.063	43.8238	15.8025	19.8315	11.6763	9.19931			8.89956	10.7611	9.08917	6.89285	7.14495	5.27927
0.28989	16.16	39.0096	16.1291	25.0926	13.7908	9.22179			7.41369	13.4784	7.70111	6.91456	7.2337	4.08007
0.29998	15.0475	37.8372	14.6962	24.2356	10.7434	11.5815			7.797	15.3819	7.84501	8.60628	6.48105	3.60955
0.31007	12.3312	36.8885	15.5695	23.1433	13.5727	10.3971			7.11188	15.0339	5.15559	7.22569	6.67267	2.65752
0.32016	13.8416	36.9268	11.4868	29.328	13.0341	13.5532			6.45094	14.6634	2.58879	5.00901	6.14793	2.70728
0.33026	11.5912	36.9636	14.4157	29.5912	13.1595	10.6476			4.50603	15.7006	2.44249	2.8138	6.14782	1.841
0.34035	11.9866	34.0358	13.4829	29.6206	11.1674	11.1221			4.18576	2.87949	0.580672	1.92372	6.01862	1.75176
0.35044	13.9064	31.0544	13.3648	31.1324	7.68046	9.12948			3.94098	3.713	1.28097	-1.35968	5.77184	1.68631
0.36053	11.9976	30.825	17.169	29.137	9.43508	7.99574			3.60296	2.74438	-3.70819	-3.01586	5.58971	1.79061
0.37062	11.3147	28.0019	15.7605	29.7809	5.9214	8.76556			2.4133	2.10983	-5.36962	-4.33972	4.74931	1.32914
0.38071	9.73544	24.2289	12.6432	29.9148	7.78885	7.51951			3.12631	2.25376	-5.95273	-7.79552	3.46637	3.39415
0.3908	8.9341	25.1404	12.7305	24.2279	8.3998	10.029			0.528793	1.70687	-8.84708	-9.24947	3.00948	2.53789
0.40089	9.08988	19.4536	10.7204	27.6045	8.58554	7.54045			0.744487	1.25572	-12.5109	-10.4972	1.76574	1.77007
0.41099	7.05485	15.5167	10.4467	25.0491	10.4236	10.2496			1.07512	1.36209	-12.6768	-11.597	0.299873	0.406119
0.42108	8.43235	20.4138	15.1312	21.3561	7.85427	9.34365			1.43376	1.71776	-12.3923	-13.2997	-0.0330696	0.760599
0.43117	9.05946	11.9042	12.9912	17.4304	6.20322	5.2129			1.86615	1.12687	-11.0722	-13.1331	-1.92527	1.72692
0.44126	7.36642	13.1485	10.6278	15.4595	7.34913	10.1543			2.36465	1.32539	-12.3346	-11.1425	-3.56202	0.358728
0.45135	6.19651	10.42	12.3471	13.3386	7.86791	6.26441			3.931	2.08782	-9.90785	-11.3464	-5.08056	0.300841
0.46144	2.09378	11.9536	11.2389	7.6234	3.84311	12.6649			2.67882	0.165158	-8.17331	-9.72277	-6.65438	0.484871
0.47153	2.74998	12.2219	8.04738	6.19335	1.7824	11.4574			3.17727	0.488068	-9.99567	-7.67612	-6.92506	1.13652
0.48162	1.9422	13.3665	5.63265	6.86779	1.75157	12.1535			3.24662	0.503786	-9.38129	-5.45234	-9.22319	-0.513001
0.49172	4.18832	12.1029	3.59473	0.021375	1.80291	9.01902			2.68419	0.848092	-6.96004	-1.61286	-10.7888	0.119665
0.50181	4.06187	15.9032	7.13914	3.1711	4.80144	8.97803			-0.118323	1.185	-4.0087	0.863086	-10.5659	-0.0257763
Max Current	81.319	84.5277	82.3779	84.223	83.6372	83.2809		Max Current	89.8845	92.6951	91.1056	92.3282	92.3398	92.1927	Average
Found	9.41173	7.62343	8.82156	7.79327	8.1197	8.31827		Unspiked	4.63798	3.07156	3.95742	3.27607	3.26961	3.35155	3.59403
Average	8.34799
RSD	0.0802054							Spiked Concentration		6
								Recovery	0.795625	0.758644	0.81069	0.752867	0.808347	0.827787	0.792327

## Sheet: Infected-Quino-H
V	µA	µA	µA	µA	µA	µA
	SPE mod 1	SPE mod 2	SPE mod 3	SPE mod 4	SPE mod 5	SPE mod 6			Unspiked 1	Unspiked 2	Unspiked 3	Unspiked 4	Unspiked 5	Unspiked 6
-0.79995	0.256063	0.279706	0.258973	0.160125	1.53375	1.21616			0.0558997	4.49658	0.00193445	-1.31463	-3.84279	-1.49824
-0.78986	0.0523422	3.87287	0.10538	0.069825	4.36875	2.72057			-0.525475	3.49647	-0.445099	-2.01023	-3.91836	-1.49095
-0.77977	3.09218	6.58034	0.0989929	2.38502	2.06699	1.67327			1.50092	2.408	-0.686347	-1.78604	-0.061306	0.0662159
-0.76968	5.33091	14.9795	4.60585	3.76176	1.33672	3.00354			1.19806	0.00192553	-0.504182	-1.52517	0.715971	0.0043392
-0.75959	5.67991	22.2955	5.99385	3.1009	3.64124	3.64391			0.547095	-0.0247162	0.0329837	-2.10807	-0.065092	-0.666632
-0.7495	6.80635	18.7606	4.70157	3.55432	3.18173	3.62736			1.52387	-0.030378	-0.173774	-2.59822	-0.338025	-0.953482
-0.73941	6.83628	21.8596	6.86575	6.4456	2.68903	2.91634			1.56479	-0.0246404	-0.484098	-2.8309	-0.501461	-0.994387
-0.72932	7.72159	17.7482	16.4952	15.1275	1.3768	2.08403			2.19238	-0.027821	-0.361709	0.108843	-0.455156	-1.0486
-0.71923	8.34738	19.0359	16.0595	15.7847	1.08369	2.01072			1.5305	-0.0403162	-0.687216	-1.0596	0.0678934	-1.21549
-0.70913	8.52319	20.1683	15.489	15.5491	0.0054752	2.16026			2.67144	0.159793	-0.554531	-1.84522	0.0584336	0.623443
-0.69904	8.80573	21.1813	15.0794	15.032	0.000775159	1.31422			0.405004	0.204116	-0.566135	-0.645744	-0.0477862	2.15772
-0.68895	9.35533	23.8051	15.6246	14.3398	0.009145	0.813168			1.39616	0.463544	-0.44645	1.53245	0.249078	3.43894
-0.67886	10.0788	24.0275	16.9572	15.1309	0.827322	1.03006			4.40041	0.195312	-0.221343	2.40794	0.458685	5.631
-0.66877	10.5866	23.9107	16.899	14.8055	2.15372	1.77281			5.9384	-0.0243453	0.089721	1.85876	0.66381	8.31132
-0.65868	12.0111	24.5644	17.7707	15.2946	5.79831	2.94607			6.11943	-0.0185903	0.707235	1.47071	0.915611	9.05636
-0.64859	13.2037	19.9	17.8557	14.5855	7.23561	6.10888			8.65642	-0.0224515	1.80088	1.17119	1.30978	8.32254
-0.6385	13.5049	18.7093	17.6849	14.642	10.8111	8.09575			10.2493	-0.032067	3.32159	0.572387	1.4853	7.50044
-0.6284	13.4095	17.2405	18.334	14.1243	11.7238	11.5492			12.0161	-0.0336199	4.54002	0.480979	1.68406	6.12776
-0.61831	14.5377	19.4096	17.806	13.0083	14.8629	13.337			13.4848	0.138187	6.30882	1.70559	1.60168	4.5823
-0.60822	14.6724	20.2328	17.9304	12.096	15.5196	23.9096			15.8661	-0.003354	8.37556	1.01046	1.67906	6.17006
-0.59813	14.9062	23.7226	17.5249	11.3102	16.961	30.1036			17.4443	0.800954	9.54373	0.972656	1.88186	5.64472
-0.58804	14.8185	28.4721	18.6446	10.7863	17.8152	27.0356			20.0922	0.300202	11.8322	2.02129	1.3364	2.81731
-0.57795	26.9903	29.5152	18.6842	10.3101	18.0442	36.0211			22.6135	0.596866	15.3092	1.36985	1.38853	3.46561
-0.56786	22.7527	28.7751	19.869	8.51215	20.0258	22.0655			25.6522	2.56092	18.1141	3.08475	1.52866	2.50822
-0.55777	16.7842	20.2179	19.3922	6.4255	22.102	24.9717			27.7944	2.95796	20.7521	3.45974	1.48826	3.37785
-0.54768	17.2872	20.6621	19.1216	11.9875	25.9481	28.6204			30.5745	3.61969	23.6877	3.61307	1.18208	3.67082
-0.53758	17.5814	21.2687	19.6606	14.0965	29.6916	31.4605			33.3348	4.0359	28.1037	3.19823	1.4733	2.20836
-0.52749	18.3977	24.0239	19.2367	15.8447	32.3379	34.3991			36.0722	5.59347	30.7339	2.46854	1.47356	1.59027
-0.5174	18.4936	22.7818	17.9643	20.7377	36.4754	37.3766			39.7888	6.39773	35.0238	2.10603	2.15332	1.63959
-0.50731	19.1541	23.1382	17.4435	22.8942	40.0627	40.3632			43.8304	7.8643	39.7572	0.49936	2.2548	2.13659
-0.49722	19.5566	26.2295	16.8924	25.9949	44.5732	42.3612			47.5677	9.6239	44.2711	-0.356203	2.21157	0.912154
-0.48713	20.1881	28.11	17.1735	30.4891	49.3708	45.1978			52.3403	12.049	49.1961	-0.305914	3.08688	0.206275
-0.47704	22.4812	29.9765	17.829	35.9771	53.144	47.3293			56.3449	15.1108	53.1524	0.204246	3.648	0.0524095
-0.46695	27.1253	31.7302	18.7034	39.7035	57.5177	50.3081			61.1567	18.0059	58.4744	0.638351	4.95268	0.910454
-0.45686	32.1469	35.0495	18.6684	45.8443	61.7734	52.2691			64.8688	20.951	62.6175	1.57092	5.73	1.0054
-0.44676	39.013	35.4306	18.2647	49.5888	64.3992	54.4809			69.5447	24.8915	67.358	1.63546	7.90236	2.8076
-0.43667	46.1188	34.7428	19.8209	54.8027	69.328	57.7011			73.6835	28.7226	72.2888	3.79641	11.7474	6.40816
-0.42658	52.2477	31.4887	21.0085	61.0604	6.35275	59.6749			78.2608	34.143	77.2904	5.33164	17.8334	10.809
-0.41649	58.3106	33.2364	22.0677	66.1283	6.88352	62.3872			82.9246	39.9258	82.0938	7.05834	24.483	14.7531
-0.4064	63.731	36.33	23.1015	71.1128	7.72878	65.5358			87.1644	45.7652	86.2784	9.67414	30.5249	19.9366
-0.39631	69.1827	37.7201	24.4977	77.6007	9.98642	68.9599			91.7813	59.7875	91.4899	15.9535	37.0164	25.3103
-0.38622	73.8822	40.3215	31.9274	83.4955	89.4743	74.0117			95.2043	74.0904	95.1879	26.0914	43.7164	30.9589
-0.37612	78.3086	41.5186	39.0246	89.9692	93.8935	81.3995			98.5742	88.7815	98.4485	36.39	50.4468	36.9951
-0.36603	82.9084	86.1153	48.9864	95.4775	97.4617	88.3306			101.711	96.0442	101.646	46.4279	56.5135	43.9564
-0.35594	87.138	91.761	46.1485	98.9636	101.905	95.5552			104.418	98.5788	103.831	54.5996	62.0699	51.9589
-0.34585	88.5989	95.9105	55.4148	98.9728	105.426	102.466			106.925	99.8066	106.356	62.6643	67.1926	63.9625
-0.33576	93.0213	101.931	67.4521	99.9481	107.481	108.285			109.072	102.802	107.84	68.8339	71.8519	80.6925
-0.32567	99.9028	108.904	80.8552	104.161	109.909	113.233			111.2	106.344	109.577	76.1773	78.3081	99.9484
-0.31558	107.782	115.201	95.5633	109.508	112.623	115.581			112.216	111.733	110.708	84.7007	93.9105	105.531
-0.30549	121.26	119.491	110.121	117.099	115.761	117.616			113.882	114.721	112.304	95.9307	110.721	108.125
-0.2954	123.86	122.722	121.952	122.655	116.504	122.04			112.35	114.888	110.883	106.108	115.065	112.3
-0.2853	117.183	122.277	122.182	120.095	119.787	119.24			113.874	113.427	113.039	113.911	111.77	114.628
-0.27521	101.546	121.803	118.569	104.515	122.884	110.43			115.392	110.047	114.426	114.813	103.675	113.997
-0.26512	81.4175	122.182	113.878	93.3563	116.397	97.7716			105.063	104.097	104.174	111.624	91.3708	106.77
-0.25503	65.2748	121.51	110.739	93.5943	111.424	89.6572			96.9605	95.7765	97.2041	102.325	78.6275	107.606
-0.24494	51.3718	120.343	106.41	91.088	105.194	82.8095			91.4499	83.4348	90.5455	90.123	67.4416	102.997
-0.23485	40.3113	117.254	98.6662	85.3909	97.1523	77.6855			83.5012	68.7225	83.2198	77.9429	57.7365	97.6186
-0.22476	34.9108	108.896	89.2943	78.6231	88.8472	73.2094			75.2157	53.5326	75.6902	65.9948	49.0323	91.6415
-0.21467	35.508	98.5102	78.6166	71.9922	80.486	68.8243			67.5267	38.7236	68.9536	55.7788	41.7413	86.8988
-0.20458	29.2708	88.3864	67.7502	66.7596	73.6123	64.4705			62.3961	26.5563	63.545	46.2927	35.99	79.9021
-0.19448	22.1286	78.853	57.4445	59.2248	67.196	59.887			56.8994	16.3182	58.1479	38.1599	30.4949	76.3966
-0.18439	15.3217	70.3989	48.8216	54.905	60.8519	55.4027			51.58	9.3353	52.851	31.4059	26.0388	63.0077
-0.1743	11.243	62.5596	40.8319	49.8907	55.5513	49.635			47.1301	0.268699	48.387	24.3082	22.1366	50.0143
-0.16421	9.65304	54.2759	62.315	43.0787	49.7416	45.4299			41.8462	0.246218	43.0235	20.238	18.2917	36.1938
-0.15412	7.22875	48.4818	53.3367	37.2862	45.1325	41.6172			37.7905	0.28087	38.5939	15.2021	14.7008	26.4519
-0.14403	5.97304	43.2232	45.9408	33.3816	39.7826	37.4052			32.9011	0.290111	33.8286	12.6513	12.6888	17.7054
-0.13394	5.07679	37.6251	40.6006	16.2997	35.587	10.886			29.2551	0.313175	29.6686	9.60385	9.88831	11.1291
-0.12385	4.91238	33.0467	34.525	13.7465	31.6287	9.0543			25.0855	0.314589	25.7945	6.99647	7.59792	7.73045
-0.11376	4.86444	49.3931	30.1742	12.5545	48.8977	26.8219			21.6517	0.360711	21.0528	4.60528	3.91036	5.05857
-0.10366	5.02724	33.9306	24.7209	10.2917	25.8474	22.8013			18.9155	0.465699	17.8422	2.27411	0.808123	1.83813
-0.09357	5.16562	34.6329	20.9581	8.57455	24.7057	20.8156			16.0886	0.555701	15.6444	1.23836	2.1793	-0.665356
-0.08348	5.06236	33.6371	16.4544	6.1251	20.2402	20.0364			12.7011	0.35183	12.2633	0.0688411	0.355991	-0.271453
-0.07339	4.92822	32.4714	14.0781	4.99609	17.4542	17.4713			10.1516	0.393929	9.3562	-0.564125	-0.395962	0.470246
-0.0633	5.07703	31.0991	10.8311	3.15055	14.296	18.0386			7.8695	0.364936	7.29133	-1.90349	-0.298212	0.976406
-0.05321	4.30865	30.6542	7.72672	1.40653	10.5986	18.8437			5.37591	0.37012	5.19993	-2.58282	-0.451501	1.58241
-0.04312	4.63204	17.5937	5.23552	0.753848	8.30368	28.0541			4.14364	0.383126	4.12522	-3.22088	-0.585661	1.9285
-0.03303	6.98858	14.8187	4.5123	0.578813	6.68602	28.35			2.57015	0.424748	3.1553	-3.34098	-0.385785	2.25791
-0.02293	10.8779	17.6372	3.63348	0.555282	2.33273	26.0242			1.25463	0.427106	1.60111	-3.43524	-0.455488	2.91096
-0.01284	14.4952	14.6588	3.20833	1.2989	2.02228	17.8868			0.110281	0.414066	1.23732	-3.78921	-0.747242	3.29718
-0.00275	18.4682	17.459	1.83269	2.24315	2.42682	20.1206			-0.133593	0.486032	0.998268	-3.77205	-1.03827	3.68366
0.00734	21.7714	17.6643	1.32004	2.28242	2.29916	21.4751			-0.0829503	0.461399	1.3961	-3.61542	0.545922	4.57018
0.01743	20.7509	17.5509	1.08281	2.05931	2.43786	20.502			-0.115487	0.492164	1.59198	-3.99237	-1.34763	4.51862
0.02752	23.0612	17.4296	1.29155	3.349	2.0389	19.2029			-0.0636899	0.646747	1.93202	-3.65475	-0.456672	4.97371
0.03761	25.4241	14.0661	1.93873	4.75055	1.92851	17.5823			0.458997	0.831772	2.01513	-2.71717	1.01322	5.6084
0.0477	27.4737	10.9366	2.02852	4.84486	0.0035754	19.3646			0.534966	1.47784	2.42279	-1.92361	0.0874625	5.54995
0.05779	29.4036	11.1686	2.88072	5.67718	1.61517	17.8183			1.83445	1.87843	3.3937	-0.146274	0.916068	5.44278
0.06789	33.2202	8.1495	3.3127	6.03807	1.93306	17.8593			1.84614	1.99609	3.00393	0.774655	1.37037	6.09282
0.07798	35.1624	7.82618	3.56905	5.74095	0.816017	14.6313			2.44233	2.26114	3.55376	1.7874	1.86909	7.80498
0.08807	37.5232	2.91869	4.87226	5.22787	0.001947	15.3193			3.712	2.38232	4.39442	3.07148	1.59966	7.71251
0.09816	39.7271	4.83488	5.04697	4.69724	0.009794	16.5307			4.00726	2.86839	4.28981	4.73134	1.89306	8.24333
0.10825	41.3693	4.34558	1.03394	4.67467	0.013275	12.5684			3.20228	3.22249	3.39395	5.91881	2.5134	8.94454
0.11834	43.3802	5.70963	0.500293	4.23029	0.0160598	16.7778			3.20757	4.12931	3.30485	6.7547	3.66725	9.17081
0.12843	44.3556	7.25297	0.747353	3.92015	0.0086494	16.1537			6.02235	5.13938	5.42149	8.63589	4.37476	9.81584
0.13852	45.3401	7.53858	1.05483	4.01676	0.01298	14.2318			5.37884	5.60862	4.23404	9.59252	4.54196	9.99479
0.14862	45.9411	9.32367	2.46972	4.56392	0.0114814	12.9931			4.80393	6.08344	2.9018	10.8122	4.5305	10.6065
0.15871	46.7803	8.93648	1.83896	3.98113	0.0100536	12.149			5.50316	6.50969	2.95177	10.985	5.62023	10.4688
0.1688	46.2382	10.8787	3.78345	5.319	0.0164846	15.9719			6.47059	7.12246	3.06283	11.8259	6.02004	10.9054
0.17889	46.7151	11.8444	4.0466	5.05499	0.448022	16.9876			7.53177	7.86929	4.08148	12.4723	6.453	10.6412
0.18898	46.4306	12.1242	4.94683	5.43071	0.521525	16.2695			7.74989	8.4075	3.57266	12.4824	6.71717	11.6671
0.19907	46.4746	11.7814	5.03102	5.94698	0.0104312	19.6415			10.0918	8.446	5.49361	11.4781	6.63722	11.9894
0.20916	45.3825	12.4795	6.17018	6.12684	1.71309	22.7682			9.28514	8.61361	3.97002	11.5584	7.75238	12.4846
0.21925	43.7039	13.1053	7.85046	7.15695	0.00107636	23.2016			8.15016	8.2126	2.75132	11.248	7.47792	13.1492
0.22934	42.0167	13.921	10.7765	6.86428	3.4826	21.3494			8.40438	7.75428	2.65541	9.8266	7.80261	14.1108
0.23944	41.7315	14.9536	10.2398	7.4371	8.46462	16.7687			8.75557	7.27602	3.11561	9.00894	7.86731	9.49044
0.24953	41.2216	15.1002	10.5516	7.8985	14.3987	8.79266			8.92264	6.53662	3.36856	7.59823	8.00891	8.91987
0.25962	41.1394	13.6453	9.667	5.81704	18.1754	9.05222			10.1607	5.76669	4.24225	5.68121	7.29084	9.03636
0.26971	34.6605	12.6953	11.3294	7.34474	15.7184	10.8718			5.53993	5.55439	0.572629	5.40406	7.0456	8.40678
0.2798	33.4852	11.4437	11.4711	6.99826	25.3118	16.6945			7.41553	4.83773	3.09685	4.78649	6.5374	7.96391
0.28989	32.991	10.189	12.3003	6.77068	30.1433	17.5436			7.48227	4.01544	3.37816	2.33867	6.09304	7.37735
0.29998	33.1701	9.58671	13.4758	7.53265	31.4776	10.2914			7.55471	3.72999	3.56678	1.51023	5.35631	7.37304
0.31007	23.8477	8.1719	14.4188	8.03565	32.1221	9.48759			6.04074	3.37223	2.02088	0.935663	5.33556	6.39668
0.32016	19.9152	7.32376	15.4604	8.41922	32.9064	10.2771			5.04332	3.20193	1.55713	-0.541498	4.80496	5.9202
0.33026	15.4141	6.72663	17.3737	9.55938	32.4294	9.02141			4.67066	2.97004	1.54122	-0.765014	3.85848	5.0087
0.34035	11.4098	6.25987	19.3359	11.3757	32.5511	9.01758			3.83676	2.65961	1.32444	-1.76384	3.46008	7.35479
0.35044	6.79818	5.33511	20.0925	12.489	27.474	8.46698			2.90027	2.87424	1.18843	-2.83743	2.63223	6.35183
0.36053	4.07825	4.57512	21.3508	14.1387	27.2177	7.38472			1.91199	2.13866	1.08513	-2.92158	1.93316	4.8768
0.37062	3.11484	4.67201	20.7927	14.4097	24.9758	6.70328			1.23906	1.44588	1.11938	-2.19714	0.715301	3.34181
0.38071	2.70924	4.75567	20.7324	14.758	23.5357	5.01311			0.469889	1.67067	0.776376	-2.42758	-0.180091	2.58457
0.3908	3.65465	4.13618	20.5779	14.3447	21.3158	3.69888			0.186705	1.23849	0.366127	-2.92443	-0.634476	1.26387
0.40089	13.5541	4.01739	20.1933	14.0141	19.6973	2.73498			-0.0459936	1.06729	0.0115226	-1.72836	-1.12485	0.928349
0.41099	8.79328	3.18453	18.1377	12.6869	15.4705	1.86584			0.294221	1.02044	0.247082	-0.316703	-2.37454	-0.687226
0.42108	3.7674	2.71511	15.6172	10.678	13.5559	2.14238			0.501599	1.24906	0.337788	1.92947	-2.62957	0.136925
0.43117	2.09119	2.07617	13.4389	9.36483	11.2054	1.79754			1.27336	0.802591	1.07701	4.00195	-3.23375	1.59067
0.44126	1.65811	1.199	11.457	7.34182	9.33071	0.718595			1.31046	0.868442	-0.106546	5.78599	-3.34986	0.108979
0.45135	1.07194	0.0054624	8.0167	5.20746	4.72605	1.16135			3.82262	0.798808	1.43915	7.50767	-3.54657	-0.319421
0.46144	3.26933	11.8983	4.80292	3.81752	2.90568	0.455959			3.14276	0.70198	1.60684	9.67123	-3.97713	0.269952
0.47153	3.65695	8.85631	3.80733	3.08194	3.329	0.0104622			2.99689	0.545123	0.960669	9.81481	-4.41323	-0.0812544
0.48162	4.00066	10.3917	4.37244	1.99183	1.47108	1.45879			2.86709	0.463687	1.00933	7.53917	-4.79842	1.90478
0.49172	0.447719	8.60195	5.32107	1.64603	0.947044	1.11446			1.52084	0.385028	0.393088	5.24691	-5.44321	-0.529799
0.50181	0.0202637	9.7726	10.7589	0.008001	0.320122	1.50793			0.066763	0.500799	0.515705	2.3537	-5.27671	-1.05543
Max Current	123.86	122.722	122.182	122.655	122.884	122.04		Max Current	115.392	114.888	114.426	114.813	115.065	114.628	Average
Found	88.253	76.9238	71.5489	76.2578	78.5293	70.1271		Unspiked	3.93489	-1.08418	-5.68195	-1.82573	0.682497	-3.67189	-1.2744
Average	76.94
RSD	0.083517							Spiked Concentration		80
								Recovery	1.05398	0.975099	0.965386	0.976044	0.973086	0.922488	0.97768

## Sheet: Infected-Quino-L
V	µA	µA	µA	µA	µA	µA
	SPE mod 1	SPE mod 2	SPE mod 3	SPE mod 4	SPE mod 5	SPE mod 6			Unspiked 1	Unspiked 2	Unspiked 3	Unspiked 4	Unspiked 5	Unspiked 6
-0.79995	8.12856	1.83012	11.9978	10.5111	8.71539	1.0447			-8.26864	-1.29764	-1.19458	0.430257	2.32051	1.98084
-0.78986	1.96398	2.46422	2.5329	1.91726	2.61623	1.80801			-6.81868	0.117457	0.112021	0.0252237	0.0854689	0.10582
-0.77977	8.22923	3.76094	0.428432	7.51424	4.8123	1.11443			-2.4573	-5.04969	-5.1449	0.0089244	2.19133	1.36393
-0.76968	8.23845	5.28702	7.15517	7.75581	5.92154	1.37899			-2.22455	-5.80714	-5.81418	0.545886	1.51551	0.39555
-0.75959	7.95488	9.81743	8.9568	8.15548	4.97085	3.14783			-2.80825	-6.34323	-5.82551	0.328504	0.711882	-0.404876
-0.7495	7.61271	9.50043	7.9697	8.87226	3.81813	3.90514			-1.14725	-5.37424	-4.89391	4.57941	-0.861673	-0.000441581
-0.73941	5.23772	11.2029	9.2167	10.3319	3.69274	3.16516			-0.441868	-6.04112	-5.99203	2.39604	-2.144	-0.943173
-0.72932	4.6389	8.49661	14.9851	16.8002	0.000310464	4.15479			0.902718	-4.60051	-4.36845	-0.640303	-2.89101	-1.46148
-0.71923	2.46941	9.75018	13.7436	17.1756	0.205138	3.84171			0.787678	-4.80945	-4.85424	-2.44466	-3.94765	-0.82979
-0.70913	0.00888929	10.4581	12.0859	17.3825	0.0483219	3.50026			2.36347	-3.32284	-3.54852	-1.22296	-4.99284	0.76129
-0.69904	0.000342563	11.1864	9.31232	15.1916	0.544985	4.16339			0.603533	-3.0013	-3.1945	-0.0803397	-5.7664	2.42075
-0.68895	0.0170925	12.8319	9.29914	14.0627	0.285754	3.69877			1.77932	-1.80783	-2.31868	0.0986407	-6.14706	3.2424
-0.67886	1.13887	12.7607	10.4728	12.7463	0.495139	3.93474			4.72606	-0.8911	-1.11667	0.646537	-6.30739	4.96465
-0.66877	1.56211	12.2837	11.2277	14.552	1.21932	3.26749			6.03122	-1.14004	-1.15273	1.37146	-7.04488	7.43114
-0.65868	3.66315	12.6727	12.6348	14.7483	3.11591	2.94782			5.58563	-1.33209	-1.3547	2.16256	-6.55142	6.88237
-0.64859	5.10286	9.55607	13.3242	15.6153	3.83021	5.39136			7.15595	-0.861501	-0.882932	1.76817	-6.81075	13.2011
-0.6385	6.44158	9.50033	13.6599	13.9181	5.62478	6.35397			7.45479	-0.349696	-0.0854536	3.16687	-6.06875	3.8225
-0.6284	8.12547	7.3173	15.1344	12.7688	6.13438	9.23835			7.93764	0.00449497	0.229768	4.75681	-5.9415	4.03931
-0.61831	9.84837	8.58088	15.3098	10.4813	7.70539	10.9707			8.11036	0.369151	0.946069	6.2532	-5.32857	3.13969
-0.60822	12.166	8.58381	16.4033	11.1544	8.0516	17.2166			8.97019	0.487856	1.35211	7.29834	-5.04423	3.5964
-0.59813	13.7876	11.1123	16.0163	11.3156	8.73582	21.1068			9.24056	0.133162	0.986065	9.44711	-2.87912	4.98401
-0.58804	16.2139	12.1725	17.0392	10.7925	9.19516	18.9548			9.57538	0.488598	1.31149	11.562	-2.81174	4.72427
-0.57795	25.4505	15.1462	16.806	11.8033	9.3703	24.1454			18.8604	0.380828	1.0101	13.0078	-0.309149	5.2948
-0.56786	25.5595	14.6207	18.6337	12.295	11.1698	17.8112			15.4371	1.63648	0.763102	16.3641	1.69662	2.84572
-0.55777	43.3028	6.05626	17.3254	10.9438	12.0213	17.6191			9.73377	2.09155	0.898088	19.187	3.98378	9.62258
-0.54768	49.6548	4.59349	16.4589	13.1148	14.3003	19.6599			9.30059	2.94846	1.13598	21.6884	5.76902	14.9513
-0.53758	55.4749	6.03115	16.7229	14.4435	15.6774	21.4335			8.64989	3.75266	2.23985	24.9531	8.67236	16.9982
-0.52749	52.0231	6.87402	16.2269	16.313	17.398	23.0493			8.84057	2.91043	1.10841	28.3805	11.5563	19.2795
-0.5174	50.8713	6.22079	15.6583	17.6281	20.6764	25.1132			8.95053	2.28272	0.917433	31.524	14.6304	21.3225
-0.50731	50.6401	5.37821	15.1117	16.299	21.7906	26.84			8.84648	2.71363	1.22855	34.7575	18.4187	22.6282
-0.49722	48.2519	5.35509	14.3613	17.6024	24.1769	28.3016			8.56185	2.51309	1.16613	39.6266	22.5893	21.1471
-0.48713	51.7023	4.89372	15.4439	20.9601	28.1474	29.9489			9.51136	3.08015	1.57969	43.4615	25.519	20.4341
-0.47704	54.8115	8.67399	16.0222	26.6149	33.4744	31.4846			11.5007	4.85156	3.09997	46.7323	29.4922	22.8961
-0.46695	58.5682	9.21905	17.2599	27.9209	35.0465	32.8856			15.1096	6.77361	5.48981	50.7382	33.7663	25.9336
-0.45686	61.7557	14.3873	17.7096	30.2781	41.4306	34.4567			21.3463	11.6359	11.2015	54.2154	37.3552	29.1058
-0.44676	64.2951	13.7477	18.2757	32.273	44.6908	35.587			29.4496	16.6714	16.6068	57.8365	41.9993	29.6379
-0.43667	68.1159	17.1099	19.1586	35.1256	48.8101	36.8625			36.63	25.2574	25.7573	61.4671	45.3533	31.7005
-0.42658	72.0601	17.2087	21.3329	39.0339	25.0979	38.0418			43.3063	35.4562	35.2303	65.2682	49.2293	33.9167
-0.41649	76.6422	22.6946	23.2955	41.4633	48.1074	39.2662			50.0748	42.9738	42.2418	68.9922	53.9392	35.4753
-0.4064	79.8546	46.3034	44.2984	46.0835	53.8121	41.0717			56.0745	45.9739	45.0545	73.4904	57.5325	38.5192
-0.39631	84.7129	56.8987	53.7658	52.3226	63.9379	43.7839			61.855	50.5031	49.9476	76.3419	59.6831	39.9061
-0.38622	86.5814	67.173	62.5827	60.9983	77.1849	47.0743			66.299	58.1798	57.2456	80.8574	64.4667	41.9973
-0.37612	89.683	63.911	74.7629	42.6291	62.4151	51.2846			70.0996	64.9223	63.9545	85.3928	67.9576	43.6606
-0.36603	92.109	71.4955	86.372	56.325	73.9637	72.1037			74.9581	69.5493	68.3187	90.6545	72.4983	45.3369
-0.35594	94.7822	77.9036	73.0254	44.6084	81.952	78.6678			79.6453	72.4344	71.2748	94.0776	78.2035	48.1618
-0.34585	97.7662	82.1044	79.903	52.1911	85.0938	84.1265			80.6062	77.8317	76.9219	98.5849	82.4839	66.3534
-0.33576	100.13	86.361	83.1077	58.9396	86.9223	91.7227			84.8275	83.5639	82.7994	101.445	86.7251	78.4259
-0.32567	105.055	92.4464	84.8015	71.4004	94.0773	98.2403			91.1541	91.5133	91.5282	106.578	92.2686	91.2521
-0.31558	106.535	98.4388	88.5141	86.6586	100.076	105.588			98.1586	101.547	101.51	111.263	96.2777	106.952
-0.30549	107.726	110.538	94.5505	104.689	110.219	111.337			112.771	114.826	114.832	113.684	101.384	110.426
-0.2954	108.34	116.977	99.2726	115.431	117.156	116.106			114.888	114.72	114.72	114.786	108.968	111.587
-0.2853	112.356	116.851	107.945	115.149	112.925	116.929			106.022	107.994	107.719	114.128	114.845	114.813
-0.27521	116.97	107.515	114.158	110.46	105.517	116.592			86.3577	96.621	95.8108	113.682	112.891	110.425
-0.26512	110.93	91.4753	117.254	103.732	92.404	115.716			62.74	75.983	75.1852	113.349	103.358	93.7926
-0.25503	56.0804	77.5984	113.995	95.5799	77.7259	113.591			43.8794	53.5866	52.4784	111.704	92.0133	71.7118
-0.24494	105.385	62.2287	104.767	116.917	60.0663	110.653			31.2348	39.1191	38.384	109.706	81.7849	61.5111
-0.23485	40.4201	59.4794	87.6018	98.4384	76.0731	106.15			20.739	25.7552	25.2816	105.563	72.2023	51.2615
-0.22476	35.2121	76.1844	70.8054	83.7895	68.554	94.0314			17.3004	17.5532	17.0776	101.171	65.2309	43.0159
-0.21467	33.1669	65.8622	74.3182	71.4213	59.7185	93.2056			12.6343	11.9944	11.5122	96.9775	58.4101	37.2158
-0.20458	27.449	56.5903	58.2395	61.4256	51.6082	78.8966			10.5419	8.06092	7.79216	91.9991	52.7479	32.8225
-0.19448	21.9632	47.8866	50.3783	64.6015	54.0696	66.4644			7.12464	4.58503	4.62377	87.4907	46.6485	28.1453
-0.18439	17.0548	41.601	39.7063	57.526	48.9682	58.9697			4.85044	1.78249	1.79671	82.3376	41.8115	22.6163
-0.1743	13.4253	35.1288	31.449	51.6047	44.1125	55.8837			2.99243	0.97102	0.980408	78.0716	37.8248	18.1963
-0.16421	11.3805	30.0093	41.5849	44.8324	40.2918	51.2328			1.51139	-1.83536	-1.85008	73.5368	34.5279	15.4697
-0.15412	9.00044	27.6397	33.6343	39.2809	35.6352	47.7688			0.511809	-2.67017	-2.69446	66.7278	29.1071	11.6082
-0.14403	6.5091	24.1859	29.1188	32.9196	32.027	43.6598			-0.731037	-2.80496	-2.83855	59.8217	25.3271	9.50638
-0.13394	3.26564	17.3642	25.3041	19.7612	23.8246	25.4855			-1.02666	-2.48334	-2.50487	53.3202	21.4125	6.29082
-0.12385	3.1586	14.9735	21.5328	14.6791	21.197	23.1409			-1.94432	-2.12133	-2.13371	47.1728	18.7178	5.02628
-0.11376	3.1346	23.4886	18.9094	13.0813	17.988	31.6909			-1.06365	-1.67336	-1.72075	40.7606	15.0367	2.62857
-0.10366	3.22059	15.0954	15.9584	9.94504	16.09	21.2755			-0.870053	-1.45116	-1.5854	35.4959	12.3981	0.583926
-0.09357	19.4797	16.8559	14.4276	8.01013	14.4371	19.5178			-1.35588	-0.180474	-0.267183	30.6193	9.51211	0.00789626
-0.08348	16.3767	16.3455	11.4749	5.15184	11.3031	18.1501			-1.66641	-0.0535951	-0.025149	25.4138	6.60533	-0.936994
-0.07339	13.7568	16.3478	9.98723	3.29644	8.47401	15.4209			-1.7164	0.0101612	0.0017185	19.7725	5.39628	-1.6432
-0.0633	12.1345	16.2502	8.08535	4.29678	6.0178	14.3532			-2.17315	0.834381	0.962311	15.7322	3.06088	-1.13829
-0.05321	10.062	16.6994	6.11488	5.10478	4.24888	14.0393			-2.8775	0.783378	0.899807	11.3679	1.26435	-2.01183
-0.04312	9.53311	9.87396	5.62143	4.76224	3.85258	18.9032			-2.42304	1.33019	1.87301	6.67865	0.69215	-2.44287
-0.03303	9.82971	8.86005	5.49976	5.13466	2.16589	19.1531			-2.00424	1.04408	1.97054	3.09497	-0.155165	-2.44815
-0.02293	11.5042	10.527	4.55135	5.23061	0.156984	17.9698			-1.05067	1.20619	1.83336	0.0112868	-1.27062	-2.14318
-0.01284	13.5872	8.76884	2.48302	5.7546	0.249975	12.9585			-0.408903	0.993133	2.12921	-2.41644	-1.19951	-1.68128
-0.00275	15.922	10.4162	1.49458	5.24682	0.459697	14.0857			0.00750039	1.69817	2.8431	-4.91613	-1.23171	-0.908724
0.00734	18.7142	10.5224	0.511156	4.16946	0.550658	14.9983			0.0244306	1.24075	2.72932	-6.98768	-1.62735	0.351782
0.01743	19.3811	10.6493	0.78611	3.87367	2.29142	14.4485			-0.310962	1.11884	2.83482	-7.9406	-1.5435	0.981569
0.02752	22.0036	11.6016	1.54617	4.36892	0.901732	13.0555			-0.748458	0.871926	2.73172	-9.46158	-1.00669	2.3477
0.03761	17.0653	9.51297	1.25241	4.92855	2.13745	12.7027			-0.772058	0.851979	2.5853	-8.73152	-0.921013	3.17949
0.0477	15.7257	7.78461	1.77208	5.49061	1.04007	13.9025			-0.980316	1.45568	3.07792	-8.43702	0.317878	4.71179
0.05779	17.4365	8.68138	2.97904	5.27824	2.86547	12.6101			-0.835294	1.85021	3.08648	-7.01735	0.895458	5.91659
0.06789	17.5302	6.34443	2.32797	6.96944	3.63448	11.169			-0.122718	1.77193	3.27345	-6.45766	1.27286	6.50813
0.07798	18.676	8.2904	2.31785	7.20781	1.24758	10.8189			0.224055	1.707	3.0905	-4.61024	1.28925	8.54611
0.08807	19.4632	4.2337	3.73849	7.22224	4.6593	11.6457			1.1868	2.92129	4.02617	-2.59042	1.9288	8.19706
0.09816	21.1284	17.155	3.27895	7.02392	4.15612	12.592			2.35132	2.80337	3.71632	-0.759468	2.94983	9.77365
0.10825	20.5385	18.0693	1.60278	6.50062	3.06002	10.2083			2.91807	3.66964	4.29711	1.11076	2.96723	10.5382
0.11834	20.3921	20.4662	1.40465	7.00104	4.34684	13.4389			3.97098	4.47535	4.63884	3.94112	3.93035	10.8221
0.12843	21.8759	21.6457	0.0045663	7.8475	4.50148	13.4324			5.09518	5.79452	4.92306	5.46446	3.71476	11.4588
0.13852	21.3227	22.5343	0.47762	7.59438	4.1553	12.0114			6.20245	6.84309	5.77182	7.11037	4.30869	11.6837
0.14862	19.888	23.0668	1.06184	6.74781	3.74755	12.2708			6.81021	7.44221	5.5945	10.2938	4.4678	12.9538
0.15871	20.0675	24.5435	0.608304	6.72545	3.85934	11.9855			7.67564	8.11352	5.86002	11.6844	5.14155	12.9922
0.1688	20.0395	24.5616	1.2886	7.68908	4.11302	14.1228			7.69319	8.99847	5.95741	12.4	5.58893	12.3181
0.17889	20.4542	21.8808	1.93124	8.46847	4.09622	15.149			8.51072	9.05338	5.85615	12.749	6.66296	13.1492
0.18898	19.7904	21.5125	4.08927	7.97477	3.9898	14.6452			8.63938	9.67531	5.94071	12.9069	7.22909	11.9511
0.19907	20.8561	20.394	3.2289	8.16416	3.7292	16.2561			9.22812	9.22131	5.29136	13.7381	6.56429	11.2696
0.20916	19.865	19.9636	5.1823	8.32869	2.94149	17.7043			9.34619	9.24249	5.01832	13.1264	6.78841	11.0175
0.21925	18.6787	18.8924	7.22869	9.25157	3.57176	17.6995			8.73854	8.57807	4.58902	12.3427	7.1722	8.89697
0.22934	18.4552	18.0838	9.94439	10.2952	3.58557	16.2301			8.72754	7.24307	3.55259	11.2601	6.73832	8.89154
0.23944	18.227	19.017	10.0527	10.7545	3.48961	13.5706			9.61043	6.79181	3.7617	11.2903	6.78028	8.07195
0.24953	18.173	19.3738	11.156	12.0729	6.3375	8.542			10.9921	4.44819	1.94286	11.5081	7.10893	6.72281
0.25962	18.1699	20.5655	11.2215	12.1277	8.61401	7.6774			13.8922	3.63339	2.2065	10.2733	6.32991	4.62355
0.26971	14.4081	17.8698	11.8892	13.3058	7.23572	8.69839			7.68594	2.11026	0.427298	10.0094	5.70233	3.10516
0.2798	15.0762	17.2126	12.7476	13.9924	11.6033	11.7694			7.73316	1.47874	0.35787	8.65146	5.57117	1.60705
0.28989	15.0182	18.9058	13.3962	14.2158	14.1559	11.9834			9.11343	-0.174192	-0.58649	6.74639	5.53439	-0.411742
0.29998	15.3373	19.0705	15.2624	15.508	14.815	7.73376			10.5174	-0.820192	-1.56189	6.07258	5.42021	-1.46542
0.31007	11.6368	14.4284	14.754	15.0617	14.8506	6.76742			0.321962	-1.62752	-2.08194	4.94636	4.6756	-4.51008
0.32016	10.2041	12.4183	16.1736	14.8271	15.2959	7.007			-2.16548	-3.5556	-4.41108	4.57633	5.06319	-5.88337
0.33026	9.00978	10.6134	16.937	15.1583	15.2841	6.22165			-4.25134	-3.93371	-4.5668	4.37127	3.90271	-7.84117
0.34035	7.69139	9.90241	17.5132	15.7141	15.2473	6.67662			-5.96084	-4.22313	-4.75328	4.23244	3.36087	-9.9111
0.35044	6.08566	9.45705	18.0421	15.3528	12.9522	6.195			-7.47499	-3.64337	-4.37185	3.14066	2.27109	-11.48
0.36053	5.56114	1.12605	18.6295	16.0975	14.6538	4.6545			-8.44301	-4.38229	-4.53355	2.92011	2.11551	-13.2626
0.37062	5.04827	1.36141	18.0412	15.0824	11.6829	5.0092			-7.36255	-3.63475	-3.14426	2.05938	0.0744411	-15.4749
0.38071	4.6215	1.08927	18.6106	14.5983	10.836	3.95937			-5.96058	-3.27646	-3.20498	1.86401	0.918604	-16.92
0.3908	4.62897	0.0522624	17.0454	13.384	9.6583	1.43155			-3.17477	-2.04064	-1.95658	1.22419	-0.678363	-16.9842
0.40089	7.44845	0.0512928	16.4513	10.6214	9.06053	0.471848			6.73825	0.0664016	0.0393291	0.939303	-2.23702	-18.5433
0.41099	5.716	0.0542016	14.4044	8.84931	7.22793	2.32845			4.18986	1.51705	1.69623	0.414804	-4.26454	-21.3185
0.42108	3.96319	0.0509664	12.7436	7.00471	6.02561	0.945887			1.59048	3.34488	3.21928	0.181885	-5.31641	-21.4794
0.43117	3.2612	0.139709	10.8411	5.65414	6.09218	0.891578			0.0396641	4.3406	5.06075	-0.809264	-5.59628	-20.6725
0.44126	2.71719	0.1392	8.51576	4.89576	3.87097	0.758716			-1.69231	5.71118	5.55052	-0.614691	-6.41971	-21.9309
0.45135	2.83615	0.149395	4.02125	3.23778	2.09013	0.802442			-2.08329	4.2028	4.41626	-1.16049	-6.87526	-21.5101
0.46144	3.43311	7.17048	2.96513	1.51316	1.7351	0.766586			-4.57734	2.12802	1.99881	-1.18793	-7.03397	-20.6548
0.47153	5.06209	5.37266	2.39721	2.75366	1.28727	0.991385			-5.51409	-0.397734	-0.439141	0.756011	-7.14058	-19.8065
0.48162	4.32751	4.95928	1.5349	1.80518	1.00854	2.8716			-7.19021	-2.85748	-2.67669	0.852957	-7.39398	-19.9841
0.49172	1.30218	3.1205	2.97193	1.00166	0.857677	1.45504			-8.59798	-3.88528	-3.50127	3.61459	-7.12058	-19.5605
0.50181	0.286647	3.3406	7.42208	0.022525	0.180002	4.43438			-10.8422	-3.81381	-3.7166	7.7054	-7.38031	-17.8038
Max Current	116.97	116.977	117.254	116.917	117.156	116.929		Max Current	114.888	114.826	114.832	114.786	114.845	114.813	Average
Found	19.6443	19.7184	22.4778	19.1176	21.4964	19.2351		Unspiked	-1.08523	-1.7014	-1.63746	-2.10243	-1.50682	-1.83494	-1.64471
Average	20.2816
RSD	0.0678634							Spiked Concentration		20
								Recovery	1.03648	1.07099	1.20576	1.061	1.15016	1.0535	1.09632

[truncated: 23 more sheets: Infected-Stigma-H, Infected-Stigma-L, Recovery Summary, Phytol-DPV-Bare, Phytol-DPV-Modified, Phytol-CA-Bare, Phytol-CA-Modified, Quino-DPV-Bare, Quino-DPV-Modified, Quino-CA-Bare, Quino-CA-Modified, Stigma-DPV-Bare, Stigma-DPV-Modified, Stigma-CA-Bare, Stigma-CA-Mod, Stability, FTIR, ContactAngle, CV, Resistance …]
